# Supplementary material for: Genome-Wide MicroRNA Expression Analysis of Clear Cell Renal Cell Carcinoma by Next Generation Deep Sequencing
Source: PLoS One. 2012 Jun 20;7(6):e38298. doi: 10.1371/journal.pone.0038298 (PMC3380046; doi:10.1371/journal.pone.0038298)
Supplement: Table S1 — Clinical information and normalized reads of sequenced miRNAs in each sequenced sample. The expression level is presented as read count/million (DOC file). (XLSX) [file pone.0038298.s003.xlsx]

## Sheet: normalized reads_clinical info
Table S1. Clinical information and normalized reads of sequenced miRNAs in each sequenced sample
patient code	NRC 01	NRC 02	NRC 03	NRC 04	NRC 05	NRC 06	NRC 07	NRC 08	NRC 09	NRC 10	NRC 11	RCC 01	RCC 02	RCC 03	RCC 04	RCC 05	RCC 06	RCC 07	RCC 08	RCC 09	RCC 10	RCC 11	RCC 12	RCC 13	RCC 14	RCC 15	RCC 16	RCC 17	RCC 18	RCC 19	RCC 20	RCC 21	RCC 22
RCC stage												no recurrence	AJCC Stage IV	recurrence	recurrence	recurrence	AJCC Stage IV	AJCC Stage IV	no recurrence	no recurrence	no recurrence	no recurrence	recurrence	no recurrence	no recurrence	recurrence	recurrence	recurrence	recurrence	AJCC Stage IV	AJCC stage IV	AJCC stage IV	AJCC stage IV
fuhrman grade												fuhrman 2	fuhrman 3	fuhrman 3	fuhrman 3	fuhrman 4	fuhrman 4	fuhrman 3	fuhrman 3	fuhrman 3	fuhrman 4	fuhrman 2	fuhrman 3	fuhrman 3	fuhrman 2	fuhrman 4	fuhrman 2	fuhrman 4	fuhrman 2	fuhrman 3	fuhrman 4	fuhrman 3	fuhrman 3
overall survival												2426	1126	1943	3081	310	112	495	4294	4717	2090	2973	1985	1533	3171	2086	2392	2967	2617	385	323	258	71
Leibovich												0	6	3	1	10	8	3	3	4	7	2	5	4	1	8	0	8	2	9	9	6	9
age												48	61	78	64	61	74	52	52	56	61	63	64	74	57	73	51	70	43	55	61	na	50
sex												female	male	male	male	male	male	male	female	male	female	female	male	male	female	female	female	male	female	female	male	female	female
miR (reads/ million)
miR-145-5p	161782	93364.2	155142	111106	356113	120714	267289	205861	174844	227552	146878	81463.5	125768	81358	31490	140131	44129.3	141827	88573	149525	202757	179169	152742	89072.9	247923	113107	107121	1899.38	165167	1870.55	212680	230782	114642
miR-29a-3p	116386	115620	64399.3	61765.5	36305.4	52802.1	40117.4	38149.6	39846.1	39016.3	68411.5	69763.6	80829.3	79341	101846	50250.9	110496	46551.4	42737.7	63951.4	45465.1	30397.4	44238.8	37489.1	29470.8	36191.8	54790.9	75055.5	115203	107793	9313.44	16665.3	21998.4
miR-29c-3p	70734.1	82618.2	36696.4	43419.1	16017.1	24213.8	25447.6	25617.4	31572.1	27292.7	39578.1	63538.6	64128	47801.8	57676.5	24240.4	48172	45210.8	41858	22622.4	48847.4	20700.4	38922.4	31531.5	16318.1	57242	42465.9	6657.83	111775	12021	13348.9	25525.3	49031.9
miR-21-5p	46043.9	17350.8	23493.8	19330.2	74212.5	184393	19160.5	25986	22572.2	49614.5	27206.9	134942	209196	118984	384338	107861	236724	158423	221950	239486	117618	118927	71839.8	112322	75859.9	187568	224294	592273	135101	485045	40365.3	88684.5	21228.6
miR-451-3p	41799.5	23983.3	16762.8	44843.7	3737.32	7755.97	52392.1	17324	32660.8	16188	16462.1	56642.1	40991.1	129008	3981.45	90181.6	52819.2	40819.2	33267.5	7445.52	57882.5	61397.8	47296.4	58994.5	41627.4	31507	163121	79.9739	31410.8	1958.58	27727.9	84170.1	129475
miR-125a-5p	31311.5	55745	43912.7	78212.5	56593.7	70986	62152	100442	44418.6	36202.7	49287.8	25716.7	14428	16490	13040.8	33629.9	12017.5	35456.7	26048.5	37813.5	33904.8	26779.9	27876.5	40395.2	18105.4	12479.6	11338.1	3485.53	13391.6	13575.3	24435.8	38941.9	13604.2
miR-30a-5p	30687.8	44594.9	14288.7	16311.2	17618.8	21328.9	18142.6	25617.4	24169	21702.8	28685.5	19927.3	6885.05	25144.5	18149.8	6173.01	5340.41	7119.08	7193.18	10032.2	9950.19	13967.7	11280.1	22667.8	12061.2	4760.56	3477.96	4571.84	2466.91	12989.3	2155.79	4345.62	13297
miR-204-5p	29343.5	30355.5	65843.7	56183.1	13881.5	11090.1	39219.2	71691.9	84192.2	69629.2	63630.5	24676.2	3660.74	15913.7	10148	10042	1328.06	11002.2	8431.47	943.194	25309.9	50444.7	34969.6	52601	25459.5	668.784	113.034	13.329	7074.52	110.032	1614.19	3122.1	13114.3
miR-99a-5p	24426.9	24254.5	38879.9	42396.6	23491.7	24663	28800.7	25433.1	25257.7	27836.7	31642.8	20986	11568.4	4322.18	24487.4	11716.4	13161.5	11048.4	18086.5	22622.4	15232.2	13515.6	23482.9	17436.8	15076.5	7926.57	5673.42	2059.33	20973.7	7875.58	26071.3	25820.6	17033.4
miR-10b-5p	22795	27936.2	22043.8	18898.9	12279.8	8867.34	21316.1	23590.1	29757.6	23578.6	23411.7	9691.41	6461.66	5555.64	3316.58	8226.12	2580.3	9569.16	5119.5	6187.92	12151	13766.8	15742.5	10026.2	8759.36	7923.28	8964.44	3032.34	9712.94	3097.41	10810.8	12657.2	12764.4
miR-192-5p	22452	16946.6	45836.7	26046.6	3203.42	6550.01	19220.4	19167	28015.7	25604.5	24348.2	26854	10904	13967.5	12166	3513.09	50940.8	21033.7	2095.85	2572.35	8745.51	19293.6	29116.1	12787	19374.3	76836	17685.4	779.745	37040.9	5551.14	5299.21	5189.44	55388.8
miR-126-3p	21700.1	25112.7	25381.1	28556.8	34703.7	28659.3	21196.3	25064.5	29685	25285.6	30509.1	46660.3	13724.5	50263.6	4432.47	67095.5	11597.2	61529.2	27079.8	26137.9	51129.4	63709	54623.6	66986.3	63389.4	42364	17463.7	333.224	33658.5	1001.3	12764.8	20040.5	21127.5
miR-10a-5p	21090.3	28262.8	21665.8	25077.4	17618.8	14920.8	19519.8	31514.9	21048	19564.4	28685.5	2274.64	5907.99	4413.17	9755.32	5935.76	2716.78	5408.65	6431.72	7002.5	7100.66	12560.9	3828.88	12787	8813.94	2240.26	3221.46	6651.16	5249.52	4657.13	13444.5	6286.39	6967.34
miR-191-5p	20428.5	16215.8	47865	41718.2	15483.2	22322.1	25747	27091.8	27580.2	28211.8	33663.6	13557.1	7783.95	7218.79	14568.8	18843	31338.4	13591	17040.4	10632.4	13425.2	13867.3	23744.6	21505.4	22648.8	14708.3	10281.7	7530.87	17694.7	8070.88	102639	15441.7	31920.7
miR-130a-3p	19700.9	18762.5	26546.2	22891.9	14949.3	23882.7	15807.4	16955.4	21338.4	17407.3	16265	22068.8	9477.53	11788.7	15575.9	22219.2	22362.6	24870.6	11846.9	16563.1	14444.6	14771.6	18937.8	8427.78	14626.2	27663.9	14607.4	19773.5	40140.2	38016.2	25880.1	12446.2	34059.1
miR-23a-3p	18928.3	25400.6	22949.4	27393.7	26695.1	37290.1	19220.4	23037.2	24967.3	30143.9	31149.9	40326.4	38945.8	33131.6	20323.3	53736.7	23866.1	21912	38420.3	45201.9	48442	37230.6	48687.4	27317.6	43128.3	48776.8	41561.6	24358.7	17361.2	35268.2	33282	45186.1	71158.6
miR-140-3p	17823	12002.7	32778	25557.2	18686.6	16008.5	25866.7	16955.4	13644.9	17463.6	16610	18765.8	13190.4	10929.3	6263.78	56232.3	30939.7	32914.2	89497.1	17120.4	19819.3	19695.5	25562.6	17291.5	30016.5	24749.9	15768.2	2539.17	38593	3229.45	130059	23204.8	27760.5
miR-23b-3p	16728.1	25096.1	41368.1	41684.2	30432.5	35611.3	27184	33357.9	30556	29112.2	33910	25021	11014.8	14862.2	13196.3	30322.1	19983.8	17612.8	14937.1	19264	22715.2	33412	23992.5	35890.7	38926	24511.1	13703.2	6277.95	15677.4	6117.81	20007.4	18774.8	64276.8
miR-30d-5p	13956.3	20157.7	8068.25	9706.29	6406.83	9718.61	14370.4	14559.5	11467.6	12061.3	12765.5	8427.05	7894.69	9822.21	9001.02	3444.66	3726.37	4021.82	7012.06	8231.51	5988.65	4873.64	7685.32	8137.17	4434.26	2194.14	1747.67	393.205	969.121	2214.4	2463.76	2193.91	3775.27
miR-223-3p	13835	3460.19	4355.73	3930.01	13881.5	35800.4	7544.46	2580.17	4209.61	5477.29	4189.46	11137.3	8005.42	11460.1	10179.1	13983.9	17280	10539.9	9459.07	14319.4	8270.59	13766.8	10550.1	8573.09	11024.2	5394.75	5025.65	6.66449	15104.7	90.7768	4077.95	7298.96	3137.64
miR-100-5p	10515.7	7595.81	19992.9	14842.9	6940.74	10664.5	11795.7	13638	13427.2	12717.8	13110.6	6660.58	14480.1	9235.81	3829.81	6556.26	27334.7	9800.3	26917.1	15005.4	11629.8	6079.49	11789.7	3196.75	10273.8	3118.25	5229.98	293.238	3654.61	7561.98	8304.57	15019.8	6741.84
miR-30b-5p	8824.87	19133.5	4327.51	5713.29	9076.35	6691.89	7424.71	4791.74	7548.27	7259.29	8280.35	10308.5	10350.4	11318.5	9514.26	3946.53	2905.27	4900.15	7651.53	6845.3	6185.57	4471.69	7726.63	9590.24	4652.56	9239.43	7512.39	246.586	2282.57	7980.11	3270.85	2362.67	11761.3
miR-126-5p	8592.73	12622.8	7873.59	11426.6	5339.03	7353.98	9280.88	7371.91	12483.7	10035.5	14145.6	11766.4	4357.71	12390.2	1874.08	23492.1	3509.72	26673.4	7207.97	7145.41	20491.1	24267.7	23703.3	26445.8	22880.8	31742.5	26236.8	359.882	27497.5	709.71	2208.89	20757.7	32659.4
let-7b-5p	8364.05	13586.1	5512.36	7302.74	5339.03	7495.86	6227.17	3685.96	12048.2	14349.8	6949.58	5111.89	9842.3	9726.16	7496.32	6985.13	4348.16	5316.2	5182.34	6488.03	4934.55	2964.38	6927.8	7555.94	7736.07	3670.08	4343.1	639.791	2269.73	1837.54	6520.47	6455.15	2546.66
miR-1975-3p	8273.97	5608.27	1009.94	1594.29	7474.64	1631.59	7783.97	6081.83	7693.42	7371.84	5076.64	1839.07	22798.2	11495.5	3577.08	1569.49	3377.57	3467.09	1534	1786.35	2409.36	2009.75	2603.09	4068.58	2032.94	8985.75	15411.7	66618.2	6950.42	18301.2	7539.96	17931	2161.74
let-7g-5p	8163.1	9710.67	8161.34	11358.7	10678.1	9127.45	3652.48	6081.83	8128.9	8553.58	6210.26	8257.66	7686.24	6693.05	8950.48	8577.42	7409.41	6564.35	6113.83	7574.13	3903.63	4873.64	7726.63	9444.93	7244.89	3880.92	4221.37	2365.89	4831.45	3556.8	2867.31	2784.58	3071.54
miR-93-5p	8149.24	6438.72	9475.96	8504.51	3203.42	7353.98	8203.1	8293.4	10233.7	7315.56	9118.24	15214.7	10956.2	11758.3	7838.47	11981	9725.4	12157.9	11813.7	14876.7	8038.92	10350.2	9462.03	9590.24	11379	5916.93	4090.95	9183.67	2323.72	14529.8	2261.99	2531.43	4039.66
miR-660-5p	8111.12	9876.76	5309.25	7104.06	2135.61	4232.68	3772.23	5528.93	5298.3	3282.62	4928.78	1693.88	3191.75	3144.32	2126.81	1829.55	1564.21	2912.35	2243.71	1214.72	1482.68	1959.5	1143.16	3777.97	1418.96	1930.58	1712.89	566.482	3646.05	514.402	403.547	464.096	2663.3
miR-150-5p	7650.3	1898.95	2144.01	1230.85	3737.32	7117.52	2395.07	2027.28	2467.7	3095.05	2365.81	5238.93	4422.85	4145.25	6442.63	4854.46	4961.27	8136.09	2206.75	843.158	1390.02	1909.26	3732.47	2034.29	2414.96	3001.29	1625.95	0	3527.88	27.5081	679.658	2362.67	882.582
miR-107-3p	6375.25	6471.94	13831.7	26991.5	4271.22	2009.93	4790.13	14375.2	9217.59	7990.85	7196.02	3780.98	1159.45	1562.05	797.067	2085.04	1336.73	2034.02	3574.41	2072.17	1679.6	3115.11	3236.65	4504.5	6535.41	5304.15	1217.29	5331.59	4797.87	4448.06	1954.02	970.382	9832.81
miR-143-3p	5966.41	5060.18	5977.84	3896.09	11745.9	11775.8	1437.04	2211.57	2249.96	2307.22	1675.78	9092.5	11327.4	8295.55	1621.35	11679.9	2099.33	13221.2	10279.7	17320.5	5675.89	4873.64	4297.17	2470.21	5716.78	14782.4	8351.45	26.658	2034.04	151.295	8177.14	18985.7	11582.4
miR-455-3p	5450.15	4357.07	5441.84	4385.52	2669.51	5462.28	2874.08	2395.87	3193.5	4783.25	3450.15	5535.36	2709.73	7704.09	2095.7	3540.47	1763.53	3004.81	4505.9	3558.41	2976.95	4069.74	3567.2	13658.8	4843.57	1568.18	712.981	619.798	968.463	1006.8	573.461	1687.62	1780.72
miR-195-5p	5200.68	3410.36	6700.03	5378.92	3203.42	4965.71	2933.96	3133.06	3483.81	5533.57	3745.87	2952.19	3452.3	5429.26	2927.76	7199.56	2331.15	7442.68	15820.6	4144.34	18487.2	6431.19	11486.7	4795.12	6821.93	5065.3	7712.37	186.606	7495.22	387.865	541.603	1645.43	4132.97
miR-200a-3p	5023.98	8714.14	2826.71	3440.57	3737.32	5367.7	5149.39	4791.74	7185.37	4764.5	8378.92	2504.52	1934.59	3199.93	9428.72	866.867	2820.78	1895.34	1826.02	1257.59	1552.18	4069.74	2851	6829.41	2878.86	630.897	447.787	566.482	315.03	1799.03	1922.16	506.286	3040.44
miR-31-5p	4732.93	8979.88	4824.02	3212.82	6406.83	7117.52	2874.08	3133.06	1669.33	2269.7	4140.17	5747.09	9282.12	2158.56	28531.1	593.12	22782.9	1017.01	8035.96	6988.21	231.669	100.487	55.0919	726.533	627.618	2199.08	408.66	12076.1	1184.41	15426.6	25678.3	3544	2538.88
miR-34a-5p	4545.83	3216.59	823.751	1797.82	1601.71	4327.26	598.767	737.191	1233.85	2363.49	2316.53	7477.27	13724.5	24421.6	14253.9	4845.33	10290.9	3374.63	7211.66	12647.4	2061.86	3818.52	4186.98	6248.18	2728.77	4549.71	7668.9	6031.36	4200.4	10307.3	19784.4	9197.54	6356.92
miR-574-3p	4538.9	5071.25	9016.13	6624.31	2135.61	6573.66	5508.65	3133.06	4137.03	4595.67	6062.4	4174.2	2468.72	2477.04	1932.4	4649.15	5528.9	5408.65	6187.76	6316.54	2339.86	2914.13	5522.96	4068.58	6562.7	4549.71	3134.51	1832.73	5935.21	2423.47	9706.37	20842.1	4167.96
miR-200b-3p	4434.96	12157.7	1938.07	3862.16	2669.51	3121.31	6586.43	3685.96	4645.09	3488.96	5766.67	1185.72	2188.63	2937.06	11928.8	816.68	2300.82	1063.24	702.315	757.413	660.257	1557.55	798.832	1888.99	1459.89	217.437	199.983	219.928	98.7555	805.988	860.192	84.3811	1057.54
miR-20a-5p	4337.94	9145.97	2076.3	3818.55	4805.13	3144.95	3772.23	2948.77	3120.92	3507.72	3450.15	5928.58	11926.7	12415.5	9078.79	5917.51	3329.9	5870.93	2838.83	5201.86	3521.37	4823.39	6597.25	4940.42	3738.42	2017.88	4521.35	2479.19	1594.24	6126.06	106.197	1139.14	886.47
miR-320a-3p	3665.77	4274.02	3949.49	3833.09	5339.03	2672.03	5748.16	2395.87	5443.46	2982.5	3992.31	2552.92	2384.04	3265.64	3468.21	6291.63	3893.19	6286.98	3304.58	5301.89	2606.28	1406.82	3167.78	2034.29	2960.72	3470.76	8325.36	9910.1	2720.39	4442.56	4789.47	26664.4	3316.49
miR-30e-5p	3225.74	5098.93	1444.39	1623.37	2135.61	1631.59	2095.68	1290.08	2830.6	1950.82	3400.86	2625.51	2143.03	2825.84	2290.11	985.491	1226.24	1571.75	1652.29	1729.19	2154.52	2009.75	2203.67	1888.99	1705.48	1535.24	556.473	353.218	497.399	1108.58	371.688	759.43	2087.87
miR-30a-3p	3066.36	4628.35	2775.93	3057.75	2135.61	1158.67	3412.97	1842.98	4137.03	3076.29	3696.58	1954.01	482.019	2153.51	1465.83	1309.43	1011.75	1063.24	572.941	828.867	1042.51	1507.31	1528.8	2906.13	2223.95	800.564	434.745	539.824	589.241	1037.06	573.461	717.239	1356.92
miR-532-5p	2834.22	4262.95	6818.52	5533.99	2135.61	2057.22	4251.24	3501.66	3919.29	3113.8	4189.46	526.313	1126.88	1056.53	734.857	1076.74	1009.59	1479.29	1149.58	714.541	752.925	1105.36	661.102	3051.44	1418.96	1818.57	678.202	226.593	1280.86	321.845	4863.8	1054.76	3052.1
miR-27b-3p	2744.13	3255.35	5010.21	4792.57	3203.42	9056.51	3891.98	9767.78	7911.16	6715.31	8723.94	9933.39	1348.35	2547.81	2406.75	4416.46	3061.26	3097.26	2705.76	5144.69	6590.99	21956.5	11087.2	14821.3	12484.1	1612.66	708.634	126.625	584.304	225.567	148.675	379.715	2037.33
miR-106b-5p	2643.65	2474.73	1165.1	1434.38	1601.71	2317.33	778.397	1474.38	1524.17	1369.32	1281.48	6001.17	6246.7	6960.98	3425.44	3914.59	3013.59	4345.41	4302.6	4158.63	2641.03	2361.45	3222.87	4795.12	2210.31	1978.35	2443.27	1712.77	882.216	5751.95	392.927	1940.76	1224.73
miR-99b-5p	2626.33	3288.56	6223.27	5761.75	4271.22	3334.12	9280.88	4976.04	5733.78	5589.84	7787.47	2268.59	1713.12	2522.53	1290.86	3864.4	1557.71	4484.1	2849.92	2515.18	3289.7	2964.38	3649.84	5376.34	4038.58	4724.32	2799.76	1279.58	3711.89	4194.99	7391.28	5442.58	5688.18
let-7c-5p	2453.09	4506.55	1492.34	2631.31	2135.61	2790.26	2634.57	2027.28	5661.2	4970.83	3006.56	2099.2	2800.92	2188.89	2780.01	1834.11	1128.74	832.101	1404.63	3444.09	2038.69	1607.8	3002.51	2034.29	2537.76	681.962	926.006	139.954	745.604	657.444	1061.97	843.811	789.269
miR-342-3p	2013.06	1129.41	1390.79	1463.45	4271.22	2293.69	1616.67	1105.79	1451.59	2719.89	1725.07	3714.44	5621.38	3831.82	2052.93	2345.1	3730.7	1710.43	14127.6	2529.47	2351.44	3366.33	7161.94	2615.52	4529.76	2925.52	2243.28	339.889	2564.02	962.784	966.389	1392.29	929.238
miR-193b-3p	1992.27	2469.19	945.057	896.487	1067.81	709.388	2395.07	1290.08	870.954	825.346	985.756	677.552	7731.84	6829.54	692.087	816.68	2840.28	1340.61	1689.25	1071.81	1586.93	502.437	247.913	581.226	436.604	1115.19	1382.49	42599.4	2576.53	6093.05	2782.35	3333.05	1018.66
miR-19a-3p	1940.29	2447.05	654.487	697.806	3737.32	733.034	1736.42	921.489	1451.59	1463.11	1774.36	2310.94	3992.94	2780.35	2484.52	1158.86	892.596	2357.62	901.92	1329.05	2305.11	2361.45	2919.87	1598.37	1637.26	8835.85	4338.75	2632.47	1758.18	5135.77	1635.43	2531.43	11446.3
miR-24-1-3p	1919.51	1295.49	1627.75	838.337	2669.51	1773.47	1317.29	1290.08	508.056	769.072	887.18	2994.54	1400.46	1263.79	1489.15	1459.99	903.428	1802.88	1545.09	2415.15	868.759	1004.87	991.654	1017.15	1418.96	441.463	452.135	319.896	520.771	731.716	1072.59	421.905	276.05
let-7d-5p	1836.35	3011.75	1122.78	1938.35	2135.61	2009.93	119.753	921.489	508.056	1369.32	1182.91	2522.67	2657.62	3270.7	2072.37	1925.36	1280.4	1294.38	1452.68	3186.85	544.423	602.924	1225.79	2034.29	1364.39	2162.84	1695.5	1612.81	1019.82	1603.72	1231.88	1392.29	2122.86
miR-26b-5p	1829.42	2757.08	2318.92	2340.56	533.903	2577.44	2454.94	4976.04	5298.3	5139.65	3154.42	4150.01	2546.88	2143.4	1769.1	2929.1	1614.04	3374.63	2812.96	2472.31	6266.65	9898.01	9517.12	7410.64	5334.75	1536.89	1234.68	53.3159	269.273	387.865	106.197	675.049	1007
miR-15b-5p	1770.52	1694.11	1334.36	2049.81	1601.71	1915.35	1197.53	1474.38	1306.43	1444.35	1675.78	3061.08	3660.74	4837.8	1477.49	4042.34	3273.57	1340.61	3781.41	4072.88	3197.03	3165.35	3319.28	3342.05	2087.51	2083.77	1108.6	1306.24	1275.92	1581.72	350.449	379.715	1329.7
let-7e-5p	1562.63	3421.43	1797.02	2548.93	2669.51	2364.63	1676.55	2027.28	3266.08	2457.28	1429.35	973.981	2221.19	1961.41	1356.96	2536.73	671.613	1525.52	1057.17	3101.11	2050.27	803.899	1749.17	4359.2	1910.14	1215.67	1495.52	399.869	477.977	2134.63	913.291	928.192	1049.77
miR-484-5p	1559.17	1644.28	674.235	809.261	533.903	945.85	2694.45	921.489	1016.11	2007.09	1577.21	1869.32	3139.64	2451.76	1430.83	1569.49	842.767	2542.53	3090.18	1986.42	2154.52	1256.09	1859.35	2324.91	1992	444.758	504.304	686.442	585.291	547.412	53.0983	210.953	143.857
miR-532-3p	1500.26	2386.15	891.457	998.251	533.903	378.34	958.026	1105.79	1451.59	881.619	1527.92	84.694	403.854	480.242	299.386	132.311	162.487	416.05	203.302	185.781	115.835	351.706	192.822	1162.45	286.521	74.1263	47.8219	39.9869	207.387	35.7606	95.5769	42.1905	108.865
miR-423-3p	1257.73	1267.81	1261.02	1584.6	1601.71	1158.67	2993.83	2211.57	1451.59	1744.48	2316.53	1718.08	1335.32	1784.48	1244.2	1418.93	1492.72	2218.93	1741	1457.66	1876.52	1105.36	2258.77	2906.13	1678.2	2592.77	2256.33	1452.86	1563.96	3152.43	8070.94	7088.01	1520.22
miR-27a-3p	1247.33	1400.68	1540.3	1676.67	2135.61	4256.33	898.15	2580.17	2032.23	1631.93	2316.53	10078.6	3647.71	7102.52	2519.51	5274.2	5691.38	4900.15	4735.08	9303.32	4309.05	8491.18	7175.72	3923.28	5171.03	6798.21	3721.42	753.087	1873.06	2607.77	212.393	1687.62	3332.04
miR-424-5p	1236.94	1694.11	891.457	712.344	1067.81	496.571	958.026	1290.08	1161.27	1012.92	1182.91	1875.37	3204.77	2926.95	462.688	1428.05	1486.22	2773.67	2901.67	1400.5	1436.35	1658.04	468.281	2324.91	668.55	11565.3	12894.5	166.612	1515.24	3686.09	1348.7	4472.2	21061.4
miR-200c-3p	1226.54	5707.93	826.572	1104.86	1067.81	1064.08	3832.11	4791.74	3048.34	2588.58	4534.48	24.1983	169.358	75.8277	93.3151	9.12492	58.4954	277.367	14.7856	42.8725	34.7504	50.2437	27.5459	145.307	40.9316	8.23626	13.0423	0	25.0181	19.2557	361.068	0	279.938
miR-363-3p	1219.61	1461.58	736.298	755.957	0	378.34	479.013	1290.08	1088.69	543.978	542.166	157.289	1074.77	106.159	81.6507	182.498	62.8284	277.367	147.856	171.49	208.502	50.2437	179.049	145.307	122.795	161.431	91.2964	39.9869	95.7929	104.531	265.491	253.143	625.972
miR-331-3p	1188.43	1267.81	956.341	838.337	533.903	1797.12	898.15	368.596	435.477	862.861	1084.33	2056.85	1973.67	2244.5	1831.31	1240.99	1973.68	2265.16	1822.32	2200.79	1135.18	904.386	964.108	581.226	996.002	436.522	408.66	186.606	189.281	250.324	201.773	295.334	233.281
miR-210-3p	1164.18	2873.34	933.773	494.279	1067.81	307.401	958.026	184.298	580.636	656.525	1281.48	14591.6	10057.3	18951.9	4168.08	7496.12	20388.9	11741.9	15524.9	6759.56	14294	11355.1	11376.5	13222.9	10355.7	19650.1	7351.53	786.41	7221.66	7537.23	15504.7	9703.82	4844.48
miR-29c-5p	1122.6	1146.01	725.014	1017.63	533.903	520.218	538.89	921.489	1814.49	562.736	837.892	1203.86	885.872	935.208	839.836	314.81	684.612	693.417	595.119	728.832	706.591	301.462	688.648	726.533	272.877	805.506	556.473	46.6514	379.55	63.2687	3695.64	2236.1	1566.87
miR-18a-5p	1108.74	835.982	843.499	755.957	1067.81	922.204	359.26	184.298	290.318	506.462	345.015	1833.02	2390.55	1799.64	1496.93	1583.17	931.593	1987.8	1541.4	1786.35	451.755	251.218	950.335	1017.15	709.481	375.573	1182.51	2439.2	488.84	4811.17	53.0983	168.762	112.753
miR-20b-5p	1094.88	1367.47	2564.35	2185.49	0	780.326	1556.79	1658.68	1306.43	1031.68	2070.09	278.28	872.845	151.655	108.868	529.245	353.139	1109.47	628.387	128.617	428.588	251.218	509.6	290.613	382.028	312.978	399.965	286.573	381.855	517.153	138.056	168.762	454.899
miR-30e-3p	1049.84	1782.69	908.383	1133.94	533.903	401.986	1437.04	1474.38	1451.59	1256.78	1380.06	846.94	345.23	743.111	598.772	524.683	437.632	277.367	347.461	514.469	660.257	954.63	936.562	1598.37	723.125	382.162	173.898	146.619	144.183	321.845	329.209	295.334	365.474
miR-138-1-5p	1046.37	990.998	2338.66	1138.78	0	520.218	1676.55	1290.08	3483.81	2701.13	2119.38	12.0991	71.6514	333.642	11.6644	27.3748	808.103	231.139	51.7495	28.5816	0	0	0	0	0	329.45	4.34745	4178.63	341.036	13.7541	743.376	464.096	590.98
miR-361-5p	1025.58	1096.19	1481.06	1516.76	533.903	1537.01	2395.07	3685.96	3193.5	3038.77	2020.8	1282.51	599.267	399.359	727.08	1478.24	589.287	1340.61	1097.83	1286.17	2386.19	1859.02	2947.41	2906.13	2114.8	212.495	539.084	633.127	259.727	489.645	127.436	506.286	221.617
miR-17-5p	987.471	1278.89	11848.5	9740.21	2669.51	8559.94	8921.62	9214.89	10886.9	6809.1	9561.83	13865.6	1016.15	904.877	1399.73	13664.6	6419.33	15625	12748.9	11932.8	10193.4	10500.9	20191.2	18163.3	12306.8	8055.06	8947.05	7870.76	4376.19	17814.3	5320.45	4725.34	13265.9
miR-92a-1-3p	987.471	1378.54	555.75	765.649	0	614.803	778.397	737.191	580.636	712.798	542.166	629.155	1374.4	1263.79	995.361	638.744	268.645	369.822	317.89	1043.23	417.005	502.437	633.556	871.84	422.96	121.897	304.321	513.166	195.865	343.852	31.859	295.334	116.641
miR-502-3p	980.542	1461.58	1980.39	1826.9	1067.81	472.925	1975.93	1474.38	2467.7	1181.74	1527.92	399.272	482.019	586.401	252.728	406.059	431.133	600.962	502.709	185.781	278.003	502.437	564.692	1307.76	504.823	103.777	91.2964	39.9869	171.176	30.2589	63.7179	126.572	241.058
miR-139-5p	973.612	1234.6	1895.76	1439.23	1067.81	2270.04	2275.31	552.893	3120.92	2663.62	3400.86	816.692	143.303	652.118	136.085	2039.42	140.822	1248.15	591.423	385.852	1193.1	2612.67	2052.17	3777.97	4024.94	166.372	73.9066	19.9935	258.41	24.7573	0	42.1905	167.185
miR-362-3p	973.612	1788.23	519.076	780.186	533.903	543.864	718.52	737.191	943.533	769.072	837.892	187.537	514.588	601.566	276.057	310.247	240.481	416.05	258.748	128.617	486.505	351.706	344.324	1598.37	436.604	724.79	347.796	86.6384	882.545	145.793	424.786	168.762	2301.71
miR-1975-5p	914.71	376.469	203.117	232.602	1067.81	23.6463	658.643	1290.08	1887.07	1763.24	542.166	296.429	1556.79	990.815	590.996	282.873	1278.23	462.278	266.14	200.071	1297.35	854.143	895.243	726.533	395.672	252.029	204.33	346.553	23.3721	123.787	138.056	84.3811	291.602
let-7i-5p	897.386	952.244	431.623	562.122	2135.61	1276.9	59.8767	184.298	145.159	281.368	492.878	1712.03	3895.23	2355.71	1162.55	939.867	760.44	1017.01	1397.24	2600.93	393.838	150.731	454.508	726.533	545.755	1169.55	1452.05	506.501	306.471	2241.91	892.051	1350.1	797.045
miR-29b-2-5p	893.921	647.747	1091.75	1051.56	533.903	236.463	778.397	1290.08	1379.01	1181.74	591.453	447.668	560.184	379.138	353.82	209.873	463.63	277.367	510.102	328.689	417.005	301.462	647.329	581.226	409.316	65.89	95.6439	39.9869	223.517	27.5081	223.013	42.1905	31.1042
miR-429-3p	845.414	1411.76	228.506	523.355	533.903	472.925	1437.04	184.298	798.374	712.798	985.756	241.983	201.927	389.249	1139.22	86.6867	227.482	184.911	66.5351	185.781	139.002	100.487	151.503	581.226	259.233	42.8285	60.8643	33.3224	46.7443	379.612	180.534	0	439.347
miR-497-5p	845.414	326.642	318.78	411.9	1067.81	1111.37	239.507	184.298	580.636	450.189	98.5756	471.866	885.872	960.484	482.128	939.867	145.155	2496.3	2228.93	914.612	1436.35	753.655	812.605	290.613	368.384	1200.85	2621.51	19.9935	686.68	35.7606	860.192	3122.1	1345.26
miR-362-5p	828.09	1461.58	490.865	688.115	0	260.109	1616.67	1290.08	1596.75	750.314	1133.62	90.7436	664.404	545.959	194.407	164.249	164.654	231.139	158.945	100.036	231.669	200.975	234.14	1307.76	136.439	186.139	252.152	33.3224	222.858	46.7638	233.632	168.762	388.802
miR-221-3p	807.301	1062.97	651.666	1032.17	0	2175.46	1077.78	1658.68	1233.85	1125.47	985.756	1046.58	2585.97	2628.69	1446.38	1446.3	4112.01	878.328	961.062	3787.07	1042.51	1205.85	1198.25	581.226	845.92	2510.41	2291.11	2019.34	511.883	7900.33	16120.6	9281.92	3246.5
miR-505-3p	803.836	426.295	871.709	775.34	1601.71	1300.54	419.137	921.489	653.215	675.283	985.756	1349.05	579.725	642.008	489.904	857.742	409.468	416.05	901.92	1028.94	625.507	904.386	1184.48	581.226	859.564	266.855	147.813	246.586	207.716	82.5244	148.675	253.143	147.745
miR-193a-5p	793.442	758.473	784.256	722.036	533.903	827.619	1437.04	737.191	1161.27	1669.45	1626.5	738.048	1211.56	1172.8	532.674	1067.62	1416.89	1987.8	1238.29	957.485	590.756	703.412	1225.79	435.92	804.988	163.078	386.923	626.462	246.56	418.123	1061.97	1392.29	42.7683
miR-590-5p	789.977	741.864	1009.94	891.641	2135.61	401.986	419.137	184.298	580.636	318.884	542.166	1712.03	723.028	409.469	851.501	1797.61	2205.49	3051.04	1083.04	1014.65	1390.02	1055.12	881.47	435.92	750.413	2955.17	3260.59	2412.55	3509.77	4318.78	828.333	2404.86	2764.39
miR-140-5p	755.329	431.832	270.822	305.29	0	401.986	538.89	0	290.318	450.189	147.863	423.47	1107.34	687.504	388.813	898.805	342.306	1155.7	1031.29	285.816	695.008	452.193	564.692	581.226	382.028	681.962	726.024	86.6384	394.035	88.026	1518.61	1307.91	750.389
let-7f-1-5p	731.075	952.244	614.992	814.107	533.903	543.864	718.52	184.298	1524.17	937.893	542.166	641.254	872.845	727.946	730.969	990.054	487.461	508.506	513.799	514.469	938.26	753.655	1818.03	1598.37	1036.93	98.8351	160.856	173.277	80.3212	225.567	0	253.143	73.8725
miR-301a-3p	706.822	603.457	857.604	610.58	0	898.558	1317.29	921.489	1016.11	450.189	985.756	1016.33	814.221	586.401	769.85	574.87	610.952	970.784	1175.45	685.959	660.257	1004.87	757.513	435.92	955.071	1429.81	921.659	1319.57	501.349	2343.69	286.731	548.477	1248.06
miR-215-5p	699.892	525.949	245.433	179.297	0	47.2925	59.8767	368.596	435.477	150.063	246.439	127.041	879.359	854.325	443.247	9.12492	359.638	0	14.7856	14.2908	81.0842	50.2437	165.276	0	150.083	123.544	60.8643	0	86.2465	11.0032	10.6197	42.1905	120.529
miR-222-3p	654.849	775.082	490.865	440.975	1067.81	756.68	419.137	1105.79	435.477	750.314	1232.19	429.519	1478.63	1991.74	594.884	561.183	2534.8	369.822	413.996	1514.83	556.006	653.168	977.881	726.533	859.564	1726.32	2143.29	2625.81	393.047	7696.77	22354.4	6244.2	1971.23
miR-25-3p	637.525	769.546	922.488	1192.09	1067.81	1064.08	59.8767	184.298	217.738	187.579	295.727	1609.19	618.808	1122.25	559.891	1341.36	1068.08	1802.88	1182.85	2243.66	532.839	954.63	867.697	871.84	764.057	1396.87	878.185	493.172	651.787	2544.5	1975.26	2151.72	2200.62
miR-16-2-5p	630.596	293.424	614.992	654.193	533.903	425.633	239.507	184.298	145.159	337.641	295.727	683.601	527.615	682.449	377.149	752.806	671.613	693.417	469.442	557.342	463.338	552.681	537.146	871.84	532.111	452.994	191.288	233.257	828.23	145.793	106.197	0	206.065
miR-203-3p	589.018	1289.96	510.613	518.509	1601.71	780.326	778.397	921.489	290.318	337.641	492.878	332.726	260.551	131.435	120.532	22.8123	112.658	138.683	85.017	171.49	185.335	301.462	151.503	145.307	327.453	32.945	0	526.495	14.155	261.327	169.915	0	163.297
miR-22-5p	589.018	708.647	598.066	634.81	533.903	496.571	239.507	552.893	1524.17	1219.26	788.605	1252.26	1165.96	1359.84	435.471	643.307	1059.42	277.367	779.939	1243.3	810.842	502.437	537.146	1307.76	1077.87	357.453	182.593	186.606	57.9366	192.557	53.0983	126.572	89.4246
miR-192-3p	585.553	370.932	1117.14	620.272	0	212.816	299.383	921.489	1016.11	525.22	542.166	707.8	514.588	495.407	295.498	59.312	974.923	277.367	44.3567	0	173.752	200.975	509.6	145.307	354.741	334.392	104.339	0	436.17	41.2622	31.859	0	112.753
miR-378-5p	575.159	614.529	1198.95	823.799	0	189.17	1556.79	921.489	1233.85	1031.68	936.468	290.379	143.303	601.566	120.532	241.81	329.307	369.822	306.801	457.306	613.923	251.218	413.189	726.533	409.316	317.919	330.406	213.264	296.267	115.534	191.154	253.143	69.9844
miR-199b-5p	571.694	559.166	157.98	135.685	2135.61	780.326	359.26	184.298	72.5795	375.157	197.151	6.04957	260.551	40.4414	466.576	27.3748	23.8314	46.2278	77.6243	342.98	69.5008	0	13.773	0	81.8632	82.3626	43.4745	0	79.6628	2.75081	106.197	0	108.865
miR-31-3p	571.694	653.284	84.632	58.1505	1601.71	378.34	119.753	0	145.159	262.61	246.439	520.263	1107.34	212.317	3339.9	18.2498	437.632	46.2278	362.247	242.944	34.7504	50.2437	0	0	13.6439	24.7088	13.0423	686.442	38.8438	541.91	223.013	42.1905	46.6563
miR-374b-5p	543.975	564.703	544.466	615.426	1067.81	662.095	598.767	737.191	1161.27	656.525	837.892	943.733	677.432	687.504	695.975	953.554	535.124	970.784	539.673	800.286	1807.02	1557.55	1680.3	1598.37	1323.46	1113.54	330.406	93.3029	97.768	200.809	148.675	843.811	824.261
miR-652-3p	543.975	758.473	516.255	363.441	0	378.34	299.383	0	217.738	300.126	197.151	350.875	729.542	439.8	369.372	291.997	407.301	416.05	406.603	257.235	115.835	150.731	123.957	145.307	163.726	284.974	260.847	73.3094	194.878	145.793	711.517	337.524	237.17
miR-15a-5p	512.792	348.787	411.876	281.061	0	307.401	359.26	0	435.477	375.157	295.727	798.543	905.414	1425.56	505.457	962.679	513.459	508.506	864.956	871.74	648.674	1356.58	674.875	1307.76	477.535	1884.46	1095.56	186.606	532.292	497.897	467.265	843.811	855.365
miR-193a-3p	502.398	586.848	157.98	164.76	0	236.463	239.507	368.596	0	187.579	147.863	423.47	2605.51	2739.91	318.827	670.682	907.761	924.556	942.58	571.633	417.005	251.218	399.416	290.613	95.5071	2113.42	3486.65	833.061	2272.37	1746.77	4067.33	6708.29	2161.74
let-7f-2-5p	485.074	614.529	262.359	474.896	2135.61	472.925	239.507	184.298	1016.11	562.736	492.878	399.272	527.615	444.856	443.247	424.309	244.814	0	229.176	485.888	648.674	452.193	853.924	1017.15	382.028	120.249	173.898	93.3029	38.5147	173.301	42.4786	42.1905	132.193
miR-425-5p	481.609	487.195	527.539	523.355	533.903	283.755	179.63	552.893	580.636	225.094	246.439	296.429	1035.69	783.552	839.836	424.309	701.944	600.962	646.869	443.015	231.669	150.731	399.416	726.533	422.96	1179.43	1108.6	446.521	459.872	1034.31	3865.56	2067.34	1454.12
miR-148a-3p	478.144	764.01	434.444	518.509	1067.81	1395.13	299.383	0	362.897	562.736	345.015	1415.6	6995.79	1779.42	4556.89	410.621	1596.71	1017.01	2923.85	1429.08	625.507	351.706	1032.97	1162.45	354.741	2040.94	726.024	0	368.687	46.7638	350.449	168.762	870.918
miR-214-3p	471.214	553.63	1774.45	1415	1601.71	1891.7	1077.78	1842.98	1814.49	2607.34	2513.68	133.091	286.606	106.159	182.742	716.306	233.981	924.556	709.707	1071.81	428.588	50.2437	275.459	435.92	1241.59	614.425	447.787	0	984.922	11.0032	966.389	2615.81	1049.77
miR-92b-3p	464.285	459.513	197.475	295.598	1067.81	1466.07	479.013	552.893	1233.85	450.189	887.18	296.429	703.487	697.614	734.857	456.246	444.132	138.683	1500.74	1171.85	370.671	502.437	385.643	726.533	477.535	72.479	260.847	726.429	144.183	385.114	106.197	84.3811	23.3281
miR-361-3p	460.82	453.977	657.308	712.344	2669.51	898.558	2215.44	921.489	1524.17	1500.63	1182.91	1185.72	1537.25	1526.66	474.352	871.43	2235.82	1063.24	746.671	700.25	810.842	1105.36	1335.98	1162.45	900.495	464.525	286.932	159.948	143.525	126.537	74.3376	210.953	81.6485
miR-615-3p	446.961	376.469	349.812	373.133	533.903	496.571	239.507	921.489	798.374	600.251	394.302	387.172	338.716	161.766	334.379	168.811	95.3258	416.05	395.514	242.944	393.838	703.412	234.14	0	313.809	28.0033	99.9913	179.941	56.949	189.806	42.4786	126.572	15.5521
miR-28-3p	436.566	376.469	939.415	780.186	0	496.571	1197.53	552.893	1451.59	1031.68	1429.35	538.412	364.771	389.249	427.694	994.616	2259.65	970.784	827.992	886.031	1320.51	1457.07	1680.3	2760.83	1855.57	709.965	743.414	2245.93	789.386	927.024	2803.59	1729.81	497.667
miR-125b-2-5p	422.707	647.747	248.254	426.437	1601.71	733.034	1077.78	1105.79	435.477	412.673	591.453	248.032	241.009	111.214	287.722	127.749	136.489	46.2278	210.694	457.306	301.17	150.731	316.778	145.307	218.302	79.0681	69.5592	0	39.173	41.2622	116.816	210.953	93.3126
miR-181b-2-5p	422.707	304.497	2.82107	53.3046	0	23.6463	0	0	0	56.2736	98.5756	102.843	944.496	1091.92	412.142	50.1871	69.3278	92.4556	33.2675	85.7449	0	0	27.5459	145.307	40.9316	390.399	247.805	639.791	84.2714	720.713	10.6197	210.953	38.8802
miR-125b-1-5p	408.848	398.614	197.475	421.591	533.903	827.619	538.89	368.596	725.795	375.157	394.302	320.627	136.789	70.7725	248.84	91.2492	106.158	138.683	225.48	600.214	254.836	502.437	385.643	145.307	259.233	44.4758	73.9066	0	34.8936	19.2557	31.859	210.953	46.6563
miR-338-3p	388.059	387.541	87.453	48.4588	533.903	141.878	359.26	552.893	72.5795	168.821	197.151	181.487	293.12	778.497	31.105	223.561	73.6608	184.911	129.374	157.199	926.677	502.437	564.692	0	504.823	345.923	882.532	0	139.575	24.7573	159.295	2025.15	346.034
miR-501-5p	388.059	725.256	262.359	329.52	0	283.755	838.273	552.893	72.5795	262.61	295.727	66.5453	169.358	176.931	85.5389	72.9994	112.658	92.4556	192.212	28.5816	69.5008	251.218	41.3189	435.92	68.2193	47.7703	82.6015	26.658	99.4139	55.0162	53.0983	210.953	101.089
miR-182-5p	370.735	531.485	186.19	256.831	0	638.449	299.383	368.596	72.5795	206.336	542.166	48.3966	227.982	126.379	672.647	54.7495	353.139	46.2278	88.7134	185.781	0	0	55.0919	145.307	68.2193	196.023	17.3898	4092	114.886	2236.41	679.658	0	73.8725
miR-214-5p	370.735	354.323	141.053	164.76	0	496.571	0	184.298	0	206.336	98.5756	90.7436	162.844	65.7173	163.301	59.312	8.66598	0	173.73	357.27	34.7504	0	0	145.307	109.151	482.645	134.771	0	173.81	2.75081	223.013	379.715	229.393
miR-101-2-3p	363.805	586.848	166.443	116.301	0	94.585	359.26	368.596	145.159	300.126	147.863	405.321	312.661	419.58	412.142	168.811	127.823	508.506	121.981	71.4541	185.335	452.193	413.189	0	259.233	144.958	69.5592	0	24.6889	5.50162	0	42.1905	108.865
miR-1307-3p	360.34	376.469	406.233	339.211	0	307.401	0	184.298	290.318	300.126	147.863	205.685	325.688	303.311	295.498	95.8117	162.487	231.139	240.266	128.617	81.0842	50.2437	96.4108	145.307	109.151	471.114	286.932	479.843	166.897	657.444	276.111	464.096	116.641
miR-542-3p	360.34	337.714	414.697	339.211	533.903	236.463	299.383	184.298	435.477	393.915	295.727	865.089	1120.37	667.283	221.623	360.434	457.13	416.05	946.277	271.526	613.923	653.168	192.822	1453.07	313.809	258.618	213.025	6.66449	145.829	99.0292	31.859	210.953	334.37
miR-489-3p	346.481	282.351	1072	440.975	533.903	212.816	479.013	184.298	870.954	750.314	640.741	611.007	364.771	30.3311	97.2033	159.686	155.988	1294.38	121.981	2872.45	104.251	0	4283.39	435.92	122.795	299.8	2121.55	0	234.709	308.091	84.9573	126.572	1827.37
miR-99a-3p	339.552	470.586	253.896	426.437	0	331.048	59.8767	0	0	37.5157	98.5756	284.33	169.358	131.435	373.261	109.499	223.149	46.2278	158.945	328.689	57.9173	0	55.0919	290.613	163.726	184.492	78.2541	6.66449	277.503	88.026	21.2393	84.3811	163.297
miR-744-5p	332.622	310.033	414.697	329.52	533.903	520.218	1017.9	368.596	1379.01	769.072	788.605	598.907	175.872	278.035	532.674	291.997	149.488	508.506	399.21	385.852	544.423	452.193	495.827	581.226	695.837	79.0681	156.508	186.606	120.811	129.288	84.9573	84.3811	120.529
miR-142-5p	329.157	110.726	273.643	256.831	2135.61	1064.08	299.383	184.298	943.533	450.189	295.727	1306.71	573.211	636.952	824.284	1323.11	2437.31	1017.01	827.992	528.76	532.839	502.437	785.059	581.226	586.686	4149.43	873.837	19.9935	994.468	41.2622	1231.88	421.905	1508.55
miR-22-3p	329.157	337.714	603.708	542.738	533.903	591.156	479.013	0	290.318	506.462	591.453	1082.87	670.918	460.021	217.735	447.121	2123.17	1063.24	683.833	1014.65	579.173	301.462	358.097	726.533	641.262	4928.58	1647.68	146.619	257.752	976.538	9663.89	7383.34	6664.07
miR-138-2-5p	322.227	542.558	1125.61	377.978	0	401.986	598.767	1290.08	1016.11	956.651	936.468	24.1983	13.0275	166.821	11.6644	0	441.965	46.2278	44.3567	0	11.5835	50.2437	41.3189	0	0	263.56	0	2225.94	161.63	38.5114	371.688	421.905	419.907
miR-7-1-3p	322.227	232.525	578.318	450.667	0	260.109	179.63	0	290.318	243.852	492.878	816.692	267.064	338.697	248.84	456.246	515.626	369.822	373.336	271.526	405.421	753.655	509.6	726.533	613.974	364.042	143.466	726.429	593.85	247.573	254.872	126.572	828.149
let-7a-2-5p	318.763	653.284	112.843	344.057	533.903	212.816	179.63	552.893	435.477	468.946	345.015	181.487	462.477	485.297	268.281	360.434	140.822	184.911	121.981	271.526	243.253	200.975	206.594	435.92	368.384	44.4758	65.2117	19.9935	39.8314	33.0097	31.859	42.1905	77.7605
miR-495-3p	318.763	177.162	93.0952	38.767	0	401.986	119.753	0	145.159	225.094	98.5756	42.347	338.716	267.924	108.868	104.937	62.8284	0	59.1423	285.816	162.168	100.487	41.3189	0	231.946	49.4175	13.0423	6.66449	10.8631	16.5049	0	0	38.8802
miR-424-3p	308.368	332.178	1088.93	818.953	533.903	614.803	479.013	0	2032.23	750.314	788.605	1197.81	338.716	530.794	139.973	1003.74	1237.07	1617.97	2373.08	1243.3	845.592	150.731	495.827	871.84	518.467	833.509	1408.57	786.41	524.063	951.781	223.013	801.62	353.81
miR-10b-3p	301.439	442.904	561.392	436.129	0	189.17	359.26	368.596	435.477	543.978	295.727	254.082	130.275	126.379	58.322	260.06	77.9938	508.506	166.338	71.4541	196.919	200.975	220.367	435.92	286.521	125.191	73.9066	0	60.8993	27.5081	127.436	210.953	178.849
miR-455-5p	301.439	238.061	160.801	222.91	0	118.231	239.507	0	0	262.61	295.727	653.354	534.129	955.429	167.19	164.249	151.655	323.595	351.157	357.27	405.421	552.681	592.238	1743.68	764.057	309.683	143.466	13.329	136.941	79.7736	106.197	464.096	427.683
miR-24-2-5p	297.974	221.452	265.18	358.595	533.903	851.265	239.507	552.893	362.897	93.7893	295.727	1040.53	338.716	404.414	314.939	437.996	398.635	878.328	543.37	857.449	498.089	753.655	399.416	0	463.892	695.14	586.905	79.9739	226.15	478.641	1412.41	1181.33	458.787
miR-500-3p	297.974	393.077	394.949	319.828	0	165.524	299.383	368.596	725.795	206.336	147.863	36.2974	149.817	121.324	62.2101	95.8117	49.8294	138.683	77.6243	28.5816	57.9173	0	41.3189	435.92	204.658	54.3593	34.7796	53.3159	68.4705	13.7541	84.9573	42.1905	186.625
miR-194-2-5p	294.509	382.005	341.349	353.749	0	307.401	119.753	0	508.056	187.579	49.2878	659.403	364.771	303.311	112.756	27.3748	151.655	92.4556	18.482	14.2908	11.5835	50.2437	13.773	145.307	54.5755	240.499	39.127	0	15.4717	33.0097	42.4786	0	555.988
miR-24-2-3p	291.044	310.033	234.148	150.222	0	283.755	119.753	368.596	290.318	243.852	295.727	405.321	195.413	192.097	299.386	214.436	129.99	92.4556	184.82	371.561	278.003	401.949	275.459	290.613	382.028	64.2428	78.2541	46.6514	60.5701	90.7768	63.7179	0	11.6641
miR-29b-2-3p	273.72	326.642	76.1688	58.1505	0	23.6463	0	0	0	18.7579	49.2878	139.14	273.578	237.593	334.379	36.4997	147.322	231.139	29.5711	71.4541	150.585	100.487	27.5459	0	40.9316	975.173	1047.73	459.85	614.26	1779.78	106.197	337.524	890.358
miR-200b-5p	266.79	420.759	242.612	310.136	0	331.048	598.767	737.191	290.318	375.157	394.302	30.2479	91.1927	65.7173	314.939	45.6246	127.823	184.911	96.1062	42.8725	23.1669	200.975	96.4108	290.613	81.8632	23.0615	8.6949	233.257	80.9795	195.308	244.252	0	66.0964
miR-335-5p	266.79	221.452	143.874	188.989	533.903	472.925	179.63	0	145.159	281.368	197.151	54.4461	195.413	30.3311	217.735	27.3748	101.825	46.2278	81.3206	242.944	139.002	50.2437	96.4108	0	68.2193	26.356	21.7372	0	0.987555	33.0097	21.2393	0	15.5521
miR-141-3p	259.861	697.574	141.053	96.9175	0	141.878	119.753	552.893	217.738	243.852	985.756	18.1487	32.5688	55.6069	62.2101	9.12492	28.1644	92.4556	3.69639	71.4541	11.5835	0	55.0919	0	0	11.5308	4.34745	0	6.91289	22.0065	541.603	0	353.81
let-7a-1-5p	252.931	326.642	50.7792	164.76	0	212.816	119.753	368.596	145.159	619.009	98.5756	96.7931	234.496	207.262	209.959	173.373	62.8284	92.4556	51.7495	128.617	196.919	200.975	220.367	0	177.37	42.8285	82.6015	26.658	43.1233	49.5146	10.6197	84.3811	73.8725
miR-494-3p	252.931	177.162	121.306	29.0753	0	401.986	239.507	184.298	145.159	56.2736	147.863	12.0991	136.789	70.7725	66.0982	50.1871	21.665	0	66.5351	114.327	46.3338	0	13.773	0	27.2877	52.712	30.4321	0	33.5769	5.50162	10.6197	84.3811	73.8725
miR-501-3p	249.466	448.44	414.697	450.667	0	212.816	479.013	1105.79	870.954	506.462	492.878	114.942	123.762	267.924	93.3151	91.2492	110.491	92.4556	70.2315	57.1633	69.5008	0	123.957	0	231.946	51.0648	34.7796	6.66449	49.3778	16.5049	31.859	42.1905	69.9844
miR-146b-5p	239.072	155.016	78.9898	92.0717	533.903	354.694	119.753	0	362.897	206.336	147.863	435.569	1550.28	1076.75	2185.13	447.121	675.946	878.328	521.191	528.76	440.171	200.975	137.73	290.613	109.151	459.583	439.092	6.66449	45.7567	19.2557	1115.06	337.524	462.675
miR-132-3p	235.607	404.15	166.443	208.373	0	685.741	119.753	368.596	145.159	225.094	394.302	90.7436	149.817	379.138	256.617	218.998	112.658	323.595	192.212	485.888	208.502	50.2437	509.6	145.307	313.809	105.424	113.034	66.6449	66.4954	68.7703	10.6197	0	66.0964
miR-144-5p	235.607	160.553	78.9898	251.986	533.903	94.585	119.753	0	145.159	56.2736	98.5756	248.032	65.1377	338.697	23.3288	497.308	324.974	231.139	181.123	71.4541	254.836	301.462	151.503	145.307	245.59	98.8351	469.524	0	153.071	8.25244	21.2393	210.953	369.362
miR-320b-2-3p	235.607	182.698	107.2	92.0717	0	118.231	119.753	0	72.5795	131.305	98.5756	60.4957	208.441	202.207	139.973	182.498	132.156	138.683	136.767	228.653	139.002	50.2437	41.3189	0	68.2193	47.7703	195.635	193.27	43.4524	35.7606	10.6197	84.3811	34.9922
miR-454-3p	235.607	177.162	214.401	184.143	0	236.463	239.507	921.489	580.636	412.673	295.727	151.239	306.147	308.366	202.183	173.373	249.147	138.683	192.212	100.036	347.504	251.218	495.827	871.84	395.672	306.389	295.626	806.403	155.046	739.968	95.5769	42.1905	167.185
miR-376c-3p	221.748	155.016	355.454	276.215	0	520.218	179.63	184.298	217.738	206.336	394.302	24.1983	182.385	101.104	58.322	392.372	101.825	92.4556	147.856	300.107	208.502	150.731	27.5459	145.307	491.179	947.169	439.092	6.66449	1358.55	93.5276	265.491	1518.86	3440.9
miR-16-1-5p	218.283	177.162	146.695	135.685	0	94.585	59.8767	0	0	168.821	49.2878	229.884	267.064	343.752	151.637	392.372	201.484	231.139	206.998	185.781	139.002	100.487	275.459	145.307	95.5071	485.939	147.813	133.29	313.055	129.288	31.859	168.762	190.513
miR-185-5p	218.283	293.424	442.907	785.032	1067.81	1135.02	419.137	921.489	653.215	656.525	492.878	1603.14	351.743	449.911	435.471	1879.73	1206.74	785.873	687.529	1114.68	428.588	502.437	729.967	2179.6	1227.95	1396.87	2391.1	1486.18	1970.83	1202.1	2463.76	2531.43	1979
miR-34a-3p	218.283	160.553	64.8845	184.143	0	236.463	239.507	368.596	72.5795	225.094	98.5756	641.254	579.725	808.828	509.345	492.746	615.285	554.734	850.17	1186.14	359.087	452.193	495.827	290.613	327.453	518.884	660.812	859.719	633.023	1009.55	286.731	421.905	672.628
miR-17-3p	211.353	326.642	242.612	251.986	533.903	401.986	359.26	184.298	290.318	93.7893	394.302	623.106	495.046	510.573	322.715	556.62	272.978	416.05	462.049	371.561	359.087	100.487	840.151	145.307	422.96	998.234	895.574	459.85	294.292	1369.9	233.632	970.382	859.253
miR-409-3p	207.889	182.698	157.98	106.609	1067.81	496.571	239.507	0	217.738	56.2736	147.863	36.2974	182.385	156.71	46.6576	63.8744	21.665	369.822	103.499	200.071	11.5835	0	41.3189	0	163.726	171.314	121.729	0	121.14	22.0065	307.97	675.049	264.386
miR-186-5p	204.424	238.061	146.695	193.835	0	118.231	239.507	368.596	145.159	93.7893	246.439	326.677	247.523	283.09	244.952	182.498	231.815	554.734	195.909	342.98	266.42	200.975	385.643	871.84	204.658	691.845	852.1	99.9673	89.5384	162.298	807.094	1307.91	929.238
miR-190-3p	204.424	265.742	138.232	174.452	0	0	119.753	0	362.897	225.094	345.015	54.4461	19.5413	85.938	31.105	45.6246	62.8284	46.2278	70.2315	28.5816	104.251	150.731	96.4108	0	13.6439	184.492	60.8643	46.6514	275.857	63.2687	0	42.1905	435.459
miR-181a-2-3p	200.959	188.234	197.475	300.444	0	331.048	119.753	0	0	150.063	197.151	411.371	130.275	156.71	256.617	346.747	643.449	508.506	251.355	342.98	162.168	200.975	179.049	435.92	163.726	288.269	191.288	979.68	246.231	1691.75	3727.5	1434.48	738.725
miR-99b-3p	197.494	199.307	344.17	198.681	533.903	141.878	119.753	184.298	0	225.094	246.439	145.19	45.5964	131.435	108.868	168.811	73.6608	323.595	110.892	185.781	46.3338	0	68.8648	0	95.5071	107.071	73.9066	93.3029	82.6255	129.288	53.0983	126.572	42.7683
miR-125b-2-3p	194.029	210.379	135.411	164.76	533.903	94.585	299.383	0	145.159	56.2736	147.863	90.7436	104.22	25.2759	186.63	95.8117	60.6619	0	133.07	271.526	150.585	50.2437	82.6378	145.307	54.5755	131.78	52.1694	13.329	72.4207	121.036	42.4786	42.1905	299.378
miR-149-5p	187.1	442.904	197.475	237.448	533.903	307.401	359.26	0	435.477	206.336	443.59	24.1983	52.1101	15.1655	66.0982	141.436	10.8325	46.2278	118.285	271.526	23.1669	50.2437	82.6378	0	177.37	8.23626	34.7796	153.283	17.776	66.0195	31.859	84.3811	3.88802
miR-152-3p	180.17	265.742	304.675	285.907	0	591.156	359.26	0	435.477	318.884	492.878	604.957	175.872	80.8828	124.42	269.185	368.304	277.367	365.943	457.306	417.005	401.949	316.778	290.613	286.521	258.618	226.067	66.6449	132.332	33.0097	223.013	210.953	174.961
miR-10a-3p	176.705	238.061	143.874	179.297	0	141.878	239.507	368.596	145.159	150.063	147.863	36.2974	71.6514	50.5518	97.2033	41.0621	23.8314	0	107.195	71.4541	115.835	50.2437	68.8648	0	109.151	14.8253	21.7372	6.66449	15.8009	38.5114	42.4786	0	31.1042
miR-151-5p	176.705	232.525	135.411	155.068	0	260.109	239.507	368.596	362.897	318.884	345.015	211.735	117.248	202.207	120.532	191.623	84.4933	46.2278	88.7134	142.908	220.086	251.218	385.643	145.307	409.316	36.2395	30.4321	26.658	8.22963	41.2622	10.6197	0	15.5521
miR-196a-2-5p	176.705	99.6534	126.948	164.76	533.903	236.463	59.8767	0	0	168.821	49.2878	272.231	143.303	70.7725	171.078	177.936	145.155	46.2278	214.391	85.7449	127.418	301.462	289.232	145.307	163.726	29.6505	56.5168	0	8.55881	77.0227	21.2393	0	46.6563
miR-328-3p	176.705	210.379	307.496	344.057	0	236.463	299.383	921.489	435.477	506.462	837.892	84.694	45.5964	30.3311	66.0982	123.186	45.4964	369.822	144.159	57.1633	220.086	401.949	137.73	581.226	204.658	37.8868	65.2117	6.66449	75.3834	19.2557	106.197	337.524	46.6563
miR-106b-3p	152.452	149.48	197.475	213.219	0	378.34	0	0	435.477	131.305	0	502.114	332.202	530.794	198.295	314.81	450.631	323.595	499.013	485.888	139.002	401.949	165.276	290.613	191.014	232.262	213.025	146.619	43.1233	434.628	127.436	168.762	116.641
miR-187-3p	152.452	188.234	268.001	339.211	0	70.9388	179.63	0	145.159	300.126	542.166	199.636	0	5.05518	3.88813	0	171.153	46.2278	29.5711	57.1633	0	50.2437	13.773	0	0	4.94175	26.0847	0	39.8314	0	10.6197	0	19.4401
miR-598-3p	152.452	83.0445	129.769	92.0717	0	141.878	0	0	0	150.063	98.5756	90.7436	78.1652	313.421	209.959	187.061	116.991	0	36.9639	157.199	57.9173	50.2437	27.5459	0	0	13.178	34.7796	79.9739	86.9049	24.7573	10.6197	0	34.9922
miR-151-3p	148.987	182.698	330.065	281.061	0	236.463	119.753	184.298	217.738	131.305	98.5756	199.636	32.5688	131.435	42.7694	273.748	149.488	231.139	221.784	228.653	278.003	301.462	192.822	581.226	218.302	148.253	95.6439	66.6449	95.4637	192.557	1242.5	464.096	342.146
miR-93-3p	148.987	177.162	70.5266	72.6882	0	165.524	119.753	184.298	72.5795	112.547	197.151	175.438	273.578	333.642	97.2033	91.2492	82.3268	416.05	96.1062	300.107	46.3338	50.2437	96.4108	435.92	122.795	138.369	186.94	126.625	73.7375	308.091	180.534	590.667	206.065
miR-181a-1-3p	145.522	71.9719	87.453	87.2258	0	23.6463	119.753	0	72.5795	187.579	0	266.181	123.762	222.428	101.091	82.1243	108.325	416.05	192.212	171.49	104.251	100.487	82.6378	145.307	95.5071	833.509	265.194	319.896	283.758	464.887	467.265	1561.05	338.258
miR-211-5p	145.522	210.379	256.717	334.366	0	94.585	119.753	184.298	580.636	168.821	0	127.041	45.5964	131.435	54.4338	31.9372	10.8325	46.2278	44.3567	0	92.6677	100.487	220.367	290.613	95.5071	1.64725	0	0	28.6391	2.75081	0	0	19.4401
miR-146a-5p	142.057	55.363	95.9162	87.2258	0	189.17	0	184.298	145.159	131.305	98.5756	235.933	175.872	217.373	303.274	200.748	88.8263	138.683	99.8026	128.617	115.835	301.462	234.14	0	95.5071	505.706	243.457	39.9869	198.828	836.247	1146.92	1392.29	746.501
miR-188-5p	142.057	215.916	152.338	198.681	0	141.878	59.8767	0	72.5795	56.2736	0	42.347	123.762	181.986	23.3288	114.062	114.824	0	55.4459	14.2908	11.5835	0	27.5459	145.307	13.6439	368.984	91.2964	99.9673	264.994	93.5276	722.137	506.286	769.829
miR-671-5p	138.592	160.553	217.222	353.749	0	212.816	0	368.596	290.318	187.579	345.015	163.338	182.385	197.152	268.281	273.748	452.797	277.367	147.856	314.398	231.669	50.2437	137.73	726.533	259.233	240.499	313.016	1052.99	179.406	767.477	1157.54	1645.43	171.073
miR-29b-1-3p	131.663	193.771	36.6739	33.9211	0	141.878	0	0	0	37.5157	0	90.7436	149.817	121.324	112.756	36.4997	60.6619	92.4556	25.8748	14.2908	34.7504	0	27.5459	0	13.6439	207.554	308.669	199.935	418.724	640.939	53.0983	126.572	209.953
miR-887-3p	131.663	121.799	236.969	353.749	0	141.878	0	0	72.5795	112.547	246.439	181.487	91.1927	30.3311	62.2101	269.185	147.322	508.506	129.374	57.1633	11.5835	50.2437	82.6378	145.307	354.741	88.9516	108.686	26.658	120.153	52.2654	84.9573	379.715	31.1042
miR-136-5p	128.198	49.8267	28.2107	29.0753	0	94.585	0	0	0	18.7579	49.2878	18.1487	19.5413	25.2759	42.7694	13.6874	17.332	46.2278	14.7856	28.5816	23.1669	0	13.773	0	68.2193	135.075	52.1694	0	147.475	0	244.252	1518.86	602.644
miR-324-5p	128.198	77.5082	64.8845	72.6882	0	165.524	299.383	0	145.159	131.305	49.2878	72.5948	254.037	202.207	31.105	18.2498	49.8294	0	77.6243	85.7449	150.585	0	41.3189	0	95.5071	326.156	47.8219	19.9935	57.6074	44.013	42.4786	84.3811	93.3126
miR-423-5p	128.198	310.033	135.411	116.301	533.903	94.585	239.507	0	145.159	281.368	295.727	320.627	241.009	293.2	171.078	205.311	194.985	231.139	195.909	342.98	127.418	100.487	123.957	145.307	122.795	293.211	512.999	206.599	196.853	266.829	201.773	717.239	186.625
miR-98-5p	128.198	193.771	157.98	237.448	0	260.109	0	368.596	653.215	168.821	147.863	417.42	273.578	131.435	167.19	310.247	95.3258	231.139	369.639	314.398	243.253	150.731	275.459	1017.15	218.302	108.719	178.245	46.6514	27.9807	195.308	21.2393	0	136.081
miR-16-2-3p	124.733	44.2904	118.485	159.914	0	165.524	59.8767	184.298	0	18.7579	0	235.933	110.734	237.593	112.756	465.371	487.461	184.911	151.552	228.653	185.335	200.975	289.232	0	177.37	135.075	191.288	253.251	202.778	115.534	31.859	168.762	248.834
miR-1180-3p	121.268	127.335	53.6002	48.4588	0	47.2925	59.8767	0	217.738	187.579	197.151	78.6444	26.0551	90.9932	136.085	13.6874	15.1655	138.683	44.3567	85.7449	104.251	0	27.5459	145.307	40.9316	21.4143	47.8219	26.658	13.4966	55.0162	0	0	3.88802
miR-497-3p	121.268	105.19	25.3896	29.0753	0	47.2925	119.753	0	0	0	98.5756	90.7436	293.12	363.973	139.973	132.311	43.3299	323.595	288.319	100.036	474.922	100.487	192.822	290.613	95.5071	103.777	234.762	0	71.7624	5.50162	10.6197	84.3811	101.089
miR-183-5p	117.804	155.016	59.2424	101.763	0	118.231	0	0	0	18.7579	49.2878	12.0991	208.441	30.3311	108.868	0	103.992	0	55.4459	42.8725	11.5835	0	27.5459	0	27.2877	100.482	4.34745	1086.31	28.3099	583.172	276.111	42.1905	50.5443
miR-296-5p	117.804	160.553	104.379	125.993	0	118.231	239.507	368.596	72.5795	262.61	98.5756	6.04957	768.624	80.8828	206.071	54.7495	188.485	231.139	66.5351	114.327	382.254	0	55.0919	0	27.2877	19.767	17.3898	313.231	67.8121	0	21.2393	0	0
miR-1260-5p	114.339	77.5082	231.327	213.219	0	283.755	179.63	184.298	653.215	375.157	345.015	338.776	280.092	60.6621	62.2101	278.31	168.987	231.139	402.907	357.27	208.502	150.731	358.097	435.92	504.823	116.955	126.076	19.9935	126.078	27.5081	31.859	210.953	194.401
miR-145-3p	114.339	83.0445	95.9162	82.3799	533.903	141.878	0	0	0	56.2736	147.863	139.14	149.817	166.821	23.3288	214.436	38.9969	92.4556	136.767	171.49	115.835	100.487	41.3189	145.307	231.946	197.67	286.932	0	110.606	0	31.859	295.334	256.61
miR-196a-2-3p	110.874	94.1171	5.64213	19.3835	0	47.2925	0	0	0	0	49.2878	6.04957	0	50.5518	66.0982	31.9372	60.6619	0	0	28.5816	0	0	0	0	54.5755	42.8285	104.339	33.3224	99.7431	44.013	31.859	0	23.3281
miR-101-1-3p	107.409	210.379	53.6002	67.8423	0	165.524	59.8767	0	72.5795	187.579	0	211.735	117.248	136.49	151.637	59.312	75.8273	277.367	48.0531	171.49	220.086	200.975	137.73	0	204.658	28.0033	0	0	8.55881	5.50162	0	0	42.7683
miR-33a-3p	107.409	182.698	62.0634	111.455	0	0	0	0	145.159	150.063	49.2878	54.4461	58.6239	65.7173	34.9932	41.0621	110.491	138.683	62.8387	71.4541	23.1669	0	13.773	0	13.6439	97.1878	130.423	113.296	105.668	429.127	95.5769	295.334	256.61
miR-582-5p	107.409	177.162	42.316	87.2258	0	0	59.8767	0	217.738	56.2736	98.5756	665.453	364.771	90.9932	34.9932	13.6874	67.1613	138.683	51.7495	28.5816	139.002	50.2437	303.005	0	40.9316	13.178	4.34745	0	22.0554	52.2654	10.6197	126.572	85.5365
miR-103-2-3p	103.944	77.5082	118.485	111.455	533.903	70.9388	0	0	435.477	37.5157	98.5756	157.289	208.441	121.324	77.7626	141.436	138.656	46.2278	99.8026	100.036	104.251	0	151.503	290.613	231.946	113.66	73.9066	86.6384	15.8009	192.557	159.295	42.1905	101.089
miR-132-5p	103.944	88.5808	81.8109	106.609	0	236.463	119.753	0	0	18.7579	98.5756	66.5453	136.789	111.214	77.7626	100.374	101.825	46.2278	107.195	171.49	11.5835	50.2437	68.8648	0	54.5755	88.9516	104.339	13.329	43.4524	38.5114	127.436	295.334	66.0964
miR-27b-5p	103.944	121.799	287.749	198.681	0	94.585	59.8767	0	72.5795	56.2736	98.5756	114.942	45.5964	50.5518	46.6576	82.1243	119.157	138.683	40.6603	128.617	0	150.731	55.0919	145.307	122.795	18.1198	8.6949	53.3159	20.0803	46.7638	254.872	210.953	66.0964
miR-542-5p	103.944	49.8267	67.7056	67.8423	0	0	59.8767	0	0	75.0314	197.151	72.5948	175.872	156.71	34.9932	63.8744	47.6629	46.2278	181.123	28.5816	150.585	0	41.3189	290.613	40.9316	39.534	30.4321	13.329	36.2104	13.7541	10.6197	0	15.5521
miR-590-3p	103.944	160.553	95.9162	62.9964	0	118.231	119.753	184.298	217.738	18.7579	49.2878	127.041	110.734	85.938	139.973	187.061	160.321	92.4556	81.3206	128.617	115.835	150.731	179.049	290.613	150.083	85.6571	130.423	139.954	90.8551	148.544	0	42.1905	77.7605
miR-92a-2-3p	103.944	188.234	28.2107	33.9211	0	94.585	59.8767	0	0	56.2736	0	108.892	214.954	171.876	139.973	82.1243	25.9979	46.2278	29.5711	85.7449	46.3338	0	68.8648	145.307	0	49.4175	86.949	59.9804	37.1979	112.783	21.2393	0	46.6563
miR-106a-5p	100.48	199.307	888.636	993.405	533.903	236.463	598.767	552.893	798.374	281.368	443.59	175.438	260.551	181.986	182.742	205.311	90.9928	231.139	192.212	114.327	115.835	0	192.822	0	40.9316	84.0098	147.813	46.6514	75.7126	101.78	21.2393	84.3811	268.274
miR-128-1-3p	97.0147	94.1171	31.0317	58.1505	0	47.2925	119.753	368.596	72.5795	56.2736	49.2878	42.347	26.0551	70.7725	97.2033	41.0621	25.9979	46.2278	314.193	114.327	266.42	50.2437	41.3189	0	40.9316	13.178	8.6949	33.3224	2.96267	16.5049	0	42.1905	11.6641
miR-1301-3p	97.0147	132.871	56.4213	67.8423	0	118.231	119.753	184.298	217.738	281.368	98.5756	163.338	247.523	136.49	69.9864	86.6867	97.4923	92.4556	144.159	85.7449	139.002	100.487	82.6378	0	81.8632	32.945	17.3898	6.66449	21.397	13.7541	74.3376	84.3811	7.77605
miR-200a-5p	97.0147	83.0445	62.0634	48.4588	0	23.6463	0	0	145.159	37.5157	0	36.2974	19.5413	20.2207	116.644	9.12492	45.4964	0	25.8748	28.5816	0	50.2437	27.5459	145.307	0	4.94175	4.34745	166.612	37.5271	77.0227	106.197	0	58.3204
miR-502-5p	97.0147	199.307	45.137	58.1505	0	0	0	0	72.5795	75.0314	98.5756	24.1983	52.1101	45.4966	27.2169	4.56246	21.665	46.2278	25.8748	42.8725	46.3338	50.2437	13.773	145.307	40.9316	26.356	26.0847	0	15.1425	5.50162	0	0	31.1042
miR-874-3p	97.0147	166.089	135.411	116.301	0	70.9388	359.26	368.596	0	75.0314	98.5756	18.1487	45.5964	25.2759	19.4407	59.312	25.9979	138.683	25.8748	57.1633	23.1669	0	41.3189	0	13.6439	70.8318	121.729	6.66449	153.4	2.75081	116.816	506.286	66.0964
miR-142-3p	93.5499	5.5363	14.1053	9.69175	0	165.524	119.753	0	72.5795	131.305	0	296.429	384.312	308.366	318.827	59.312	262.146	554.734	99.8026	57.1633	81.0842	200.975	220.367	0	109.151	952.111	395.618	0	77.0293	8.25244	669.038	759.43	513.219
miR-224-5p	93.5499	160.553	115.664	48.4588	0	141.878	59.8767	0	0	131.305	147.863	719.899	5412.94	363.973	182.742	570.308	1226.24	1155.7	791.028	628.796	590.756	452.193	1170.7	435.92	518.467	355.806	317.364	426.527	140.562	1650.49	1125.68	295.334	202.177
miR-129-2-3p	90.0851	94.1171	129.769	92.0717	1067.81	94.585	59.8767	0	72.5795	131.305	9857.56	30.2479	13.0275	0	46.6576	41.0621	30.3309	0	110.892	14.2908	23.1669	0	13.773	0	0	23.0615	26.0847	26.658	44.1108	0	31.859	0	27.2162
miR-197-3p	90.0851	55.363	90.2741	77.534	0	236.463	239.507	921.489	290.318	243.852	147.863	248.032	32.5688	45.4966	69.9864	68.4369	60.6619	323.595	129.374	185.781	359.087	100.487	234.14	290.613	191.014	85.6571	156.508	259.915	92.501	198.058	180.534	1265.72	132.193
let-7b-3p	86.6203	110.726	112.843	111.455	0	118.231	299.383	184.298	290.318	131.305	98.5756	84.694	84.679	96.0484	104.98	187.061	123.49	92.4556	59.1423	157.199	243.253	200.975	206.594	145.307	409.316	21.4143	39.127	53.3159	98.7555	8.25244	0	42.1905	15.5521
miR-130a-5p	86.6203	66.4356	53.6002	106.609	0	118.231	0	184.298	145.159	56.2736	0	90.7436	45.5964	55.6069	46.6576	31.9372	43.3299	0	36.9639	28.5816	46.3338	50.2437	68.8648	0	13.6439	18.1198	30.4321	206.599	40.819	101.78	21.2393	42.1905	27.2162
miR-505-5p	86.6203	110.726	318.78	285.907	0	70.9388	419.137	552.893	217.738	393.915	443.59	72.5948	169.358	176.931	69.9864	205.311	179.819	46.2278	158.945	57.1633	34.7504	50.2437	165.276	0	136.439	118.602	91.2964	13.329	64.5203	96.2784	329.209	126.572	81.6485
miR-487b-3p	83.1555	121.799	62.0634	19.3835	0	47.2925	0	184.298	0	18.7579	0	12.0991	104.22	101.104	31.105	22.8123	6.49949	92.4556	22.1784	114.327	46.3338	0	13.773	0	54.5755	51.0648	8.6949	0	41.1481	0	10.6197	42.1905	104.977
let-7f-2-3p	79.6907	116.262	16.9264	4.84588	0	23.6463	0	0	0	18.7579	49.2878	24.1983	97.7065	35.3862	46.6576	22.8123	12.999	46.2278	7.39279	57.1633	34.7504	0	0	0	27.2877	31.2978	30.4321	0	32.9185	27.5081	0	0	0
miR-15b-3p	79.6907	88.5808	67.7056	82.3799	0	189.17	0	184.298	72.5795	37.5157	0	139.14	91.1927	156.71	46.6576	182.498	225.315	92.4556	214.391	214.362	150.585	0	123.957	145.307	0	120.249	113.034	133.29	28.3099	137.541	95.5769	0	42.7683
miR-421-3p	79.6907	83.0445	282.107	344.057	0	94.585	59.8767	0	217.738	337.641	49.2878	145.19	58.6239	50.5518	46.6576	164.249	138.656	92.4556	114.588	14.2908	196.919	0	151.503	726.533	286.521	660.548	234.762	259.915	301.534	346.602	201.773	84.3811	451.011
miR-874-5p	79.6907	116.262	87.453	67.8423	0	70.9388	59.8767	0	0	56.2736	147.863	12.0991	19.5413	35.3862	27.2169	45.6246	6.49949	46.2278	33.2675	14.2908	11.5835	50.2437	13.773	0	27.2877	6.589	4.34745	0	20.0803	0	0	0	3.88802
miR-340-3p	76.2259	71.9719	56.4213	38.767	0	70.9388	0	0	0	18.7579	0	66.5453	91.1927	116.269	108.868	95.8117	64.9949	92.4556	77.6243	57.1633	81.0842	50.2437	41.3189	0	68.2193	37.8868	34.7796	13.329	23.043	22.0065	42.4786	0	11.6641
miR-543-3p	76.2259	94.1171	42.316	0	0	94.585	59.8767	0	0	37.5157	0	0	97.7065	106.159	31.105	4.56246	8.66598	0	25.8748	85.7449	11.5835	50.2437	13.773	0	0	18.1198	0	0	2.96267	2.75081	0	0	7.77605
miR-95-3p	76.2259	66.4356	47.9581	48.4588	0	118.231	59.8767	368.596	0	168.821	147.863	84.694	26.0551	30.3311	73.8745	31.9372	30.3309	0	18.482	28.5816	11.5835	0	192.822	290.613	150.083	23.0615	47.8219	0	5.59615	5.50162	0	0	15.5521
let-7a-3-5p	72.761	215.916	115.664	247.14	0	165.524	119.753	184.298	870.954	318.884	246.439	151.239	149.817	106.159	77.7626	200.748	62.8284	92.4556	114.588	128.617	231.669	200.975	96.4108	726.533	136.439	80.7153	104.339	19.9935	41.8065	63.2687	31.859	42.1905	132.193
miR-135a-2-3p	72.761	77.5082	124.127	188.989	0	23.6463	59.8767	0	145.159	131.305	0	96.7931	0	0	27.2169	31.9372	6.49949	0	3.69639	42.8725	11.5835	0	0	145.307	0	1.64725	0	0	2.96267	0	0	0	19.4401
miR-339-5p	72.761	199.307	28.2107	24.2294	0	94.585	59.8767	0	72.5795	56.2736	0	60.4957	351.743	176.931	81.6507	4.56246	30.3309	92.4556	33.2675	28.5816	57.9173	0	27.5459	0	40.9316	84.0098	60.8643	46.6514	81.9671	68.7703	0	168.762	15.5521
let-7e-3p	69.2962	149.48	22.5685	29.0753	0	70.9388	59.8767	0	290.318	131.305	197.151	0	19.5413	85.938	81.6507	18.2498	4.33299	46.2278	18.482	57.1633	23.1669	0	13.773	0	40.9316	9.88351	17.3898	13.329	7.24207	13.7541	0	0	19.4401
miR-1249-3p	69.2962	16.6089	19.7475	38.767	0	70.9388	59.8767	0	0	56.2736	49.2878	24.1983	84.679	50.5518	101.091	31.9372	43.3299	277.367	25.8748	71.4541	81.0842	100.487	110.184	0	68.2193	44.4758	121.729	173.277	34.5644	35.7606	31.859	506.286	38.8802
miR-148b-3p	69.2962	99.6534	73.3477	106.609	0	94.585	239.507	184.298	145.159	56.2736	98.5756	441.619	338.716	288.145	167.19	123.186	136.489	462.278	262.444	300.107	57.9173	150.731	289.232	0	68.2193	205.906	43.4745	13.329	38.8438	74.2719	42.4786	126.572	58.3204
miR-181c-5p	69.2962	33.2178	0	29.0753	0	0	0	0	72.5795	37.5157	0	211.735	169.358	90.9932	38.8813	109.499	25.9979	0	73.9279	257.235	11.5835	0	82.6378	0	54.5755	209.201	139.118	19.9935	12.1799	118.285	169.915	464.096	252.722
miR-338-5p	69.2962	38.7541	42.316	67.8423	0	47.2925	59.8767	184.298	0	75.0314	197.151	60.4957	32.5688	50.5518	0	72.9994	15.1655	46.2278	11.0892	28.5816	34.7504	0	55.0919	0	54.5755	11.5308	26.0847	0	17.1176	2.75081	0	42.1905	46.6563
miR-766-3p	69.2962	105.19	160.801	96.9175	1067.81	94.585	119.753	737.191	0	206.336	147.863	54.4461	39.0826	35.3862	58.322	82.1243	171.153	184.911	62.8387	85.7449	11.5835	50.2437	27.5459	0	81.8632	74.1263	117.381	79.9739	86.9049	44.013	42.4786	42.1905	81.6485
let-7d-3p	65.8314	127.335	81.8109	58.1505	0	165.524	598.767	184.298	145.159	318.884	98.5756	145.19	117.248	136.49	73.8745	86.6867	47.6629	462.278	40.6603	71.4541	196.919	401.949	82.6378	145.307	272.877	44.4758	82.6015	73.3094	39.173	44.013	31.859	126.572	34.9922
let-7i-3p	65.8314	44.2904	5.64213	29.0753	0	70.9388	0	0	0	0	0	66.5453	175.872	181.986	62.2101	36.4997	38.9969	92.4556	44.3567	57.1633	0	0	27.5459	0	68.2193	324.508	86.949	19.9935	42.7941	173.301	244.252	84.3811	89.4246
miR-127-3p	65.8314	49.8267	14.1053	9.69175	0	331.048	59.8767	0	0	150.063	49.2878	0	39.0826	55.6069	38.8813	9.12492	8.66598	0	11.0892	71.4541	23.1669	0	0	0	54.5755	18.1198	4.34745	0	6.91289	0	0	42.1905	7.77605
miR-1306-5p	65.8314	11.0726	56.4213	77.534	0	0	59.8767	0	0	112.547	98.5756	36.2974	32.5688	35.3862	27.2169	36.4997	56.3289	46.2278	48.0531	28.5816	46.3338	50.2437	13.773	0	163.726	37.8868	43.4745	19.9935	30.285	2.75081	10.6197	0	19.4401
miR-130b-3p	62.3666	66.4356	251.075	96.9175	0	189.17	0	0	72.5795	0	147.863	266.181	208.441	207.262	42.7694	520.12	491.794	231.139	369.639	228.653	127.418	100.487	41.3189	0	177.37	1536.89	1008.61	593.14	426.295	1446.93	1932.78	1054.76	937.014
miR-190-5p	62.3666	71.9719	45.137	87.2258	0	141.878	239.507	368.596	508.056	225.094	345.015	290.379	71.6514	80.8828	58.322	45.6246	97.4923	184.911	92.4098	157.199	208.502	150.731	275.459	290.613	136.439	293.211	365.186	13.329	22.0554	99.0292	0	126.572	633.748
miR-24-1-5p	62.3666	60.8993	78.9898	87.2258	0	94.585	0	184.298	0	18.7579	0	211.735	45.5964	45.4966	27.2169	41.0621	60.6619	138.683	51.7495	100.036	23.1669	150.731	13.773	145.307	68.2193	56.0065	39.127	0	27.3224	2.75081	212.393	42.1905	81.6485
miR-330-3p	62.3666	55.363	84.632	77.534	0	94.585	179.63	184.298	0	112.547	98.5756	72.5948	78.1652	65.7173	50.5457	118.624	86.6598	0	129.374	57.1633	46.3338	0	55.0919	145.307	68.2193	24.7088	56.5168	26.658	21.7262	35.7606	42.4786	0	31.1042
miR-660-3p	62.3666	88.5808	0	0	0	0	0	0	0	0	0	0	6.51377	40.4414	11.6644	0	0	0	0	0	0	0	0	0	0	0	0	0	0	0	0	0	0
miR-450b-5p	58.9018	49.8267	39.4949	38.767	0	0	0	0	0	18.7579	49.2878	72.5948	130.275	55.6069	34.9932	36.4997	49.8294	92.4556	85.017	42.8725	92.6677	150.731	27.5459	0	68.2193	11.5308	52.1694	6.66449	25.0181	24.7573	0	0	7.77605
miR-504-5p	58.9018	49.8267	93.0952	106.609	0	236.463	119.753	0	0	56.2736	49.2878	30.2479	13.0275	10.1104	27.2169	91.2492	12.999	92.4556	36.9639	114.327	23.1669	100.487	0	0	68.2193	59.301	56.5168	0	51.0237	2.75081	95.5769	717.239	116.641
miR-21-3p	55.437	22.1452	25.3896	24.2294	0	165.524	0	184.298	0	18.7579	0	181.487	384.312	212.317	369.372	141.436	431.133	277.367	173.73	328.689	23.1669	150.731	13.773	145.307	54.5755	477.703	326.059	306.567	141.55	621.684	148.675	210.953	112.753
miR-218-1-3p	55.437	60.8993	50.7792	58.1505	0	94.585	0	0	217.738	75.0314	49.2878	0	0	20.2207	50.5457	4.56246	0	46.2278	18.482	0	11.5835	0	0	0	0	14.8253	39.127	6.66449	6.5837	8.25244	0	0	7.77605
miR-221-5p	55.437	27.6815	42.316	67.8423	0	70.9388	0	0	0	75.0314	98.5756	36.2974	136.789	111.214	85.5389	63.8744	173.32	46.2278	40.6603	100.036	34.7504	0	13.773	0	109.151	64.2428	52.1694	86.6384	20.4095	189.806	127.436	0	81.6485
miR-224-3p	55.437	116.262	39.4949	38.767	533.903	401.986	119.753	0	0	75.0314	0	671.502	423.395	90.9932	186.63	118.624	316.308	138.683	266.14	185.781	405.421	100.487	757.513	145.307	95.5071	36.2395	43.4745	19.9935	52.0113	178.803	212.393	126.572	11.6641
let-7f-1-3p	51.9722	38.7541	47.9581	111.455	0	47.2925	59.8767	0	0	112.547	0	96.7931	26.0551	90.9932	73.8745	123.186	41.1634	0	44.3567	114.327	69.5008	100.487	27.5459	0	13.6439	21.4143	4.34745	66.6449	51.3529	5.50162	0	0	15.5521
miR-139-3p	51.9722	49.8267	28.2107	29.0753	0	0	59.8767	0	0	37.5157	0	18.1487	13.0275	35.3862	3.88813	36.4997	2.1665	0	3.69639	0	11.5835	50.2437	27.5459	0	13.6439	4.94175	4.34745	6.66449	11.5215	0	10.6197	0	3.88802
miR-144-3p	51.9722	33.2178	22.5685	29.0753	0	23.6463	0	0	0	0	98.5756	36.2974	39.0826	116.269	23.3288	91.2492	84.4933	138.683	55.4459	0	57.9173	200.975	13.773	145.307	13.6439	90.5988	373.881	6.66449	59.2533	13.7541	21.2393	421.905	501.555
miR-196b-3p	51.9722	33.2178	2.82107	9.69175	0	23.6463	0	0	0	0	0	24.1983	78.1652	10.1104	85.5389	0	34.6639	0	11.0892	14.2908	0	0	13.773	0	0	19.767	21.7372	13.329	58.9241	74.2719	10.6197	0	15.5521
miR-2110-5p	51.9722	55.363	87.453	62.9964	0	94.585	0	368.596	72.5795	112.547	98.5756	42.347	52.1101	25.2759	46.6576	13.6874	86.6598	138.683	59.1423	57.1633	0	0	55.0919	0	150.083	13.178	0	26.658	7.57126	19.2557	95.5769	84.3811	7.77605
miR-323-3p	51.9722	71.9719	73.3477	4.84588	0	236.463	59.8767	0	0	18.7579	49.2878	24.1983	26.0551	70.7725	0	13.6874	2.1665	0	11.0892	28.5816	11.5835	50.2437	0	0	81.8632	9.88351	13.0423	6.66449	22.0554	2.75081	31.859	126.572	11.6641
miR-155-5p	48.5074	11.0726	8.4632	19.3835	0	23.6463	119.753	0	0	150.063	0	284.33	403.854	753.221	108.868	150.561	506.96	323.595	206.998	171.49	115.835	452.193	344.324	145.307	231.946	146.605	291.279	579.811	34.8936	1342.4	31.859	0	19.4401
miR-26a-2-5p	48.5074	16.6089	8.4632	9.69175	0	0	119.753	184.298	0	93.7893	0	12.0991	32.5688	20.2207	46.6576	22.8123	6.49949	0	11.0892	28.5816	11.5835	0	13.773	0	0	3.2945	8.6949	0	0.329185	0	10.6197	0	0
miR-1181-5p	45.0425	83.0445	2.82107	0	0	23.6463	0	0	0	0	0	6.04957	26.0551	30.3311	31.105	0	2.1665	0	18.482	28.5816	0	0	0	0	0	0	0	0	0	0	0	0	0
miR-181b-1-3p	45.0425	60.8993	8.4632	19.3835	0	0	0	0	0	37.5157	0	30.2479	117.248	121.324	50.5457	9.12492	21.665	92.4556	29.5711	0	34.7504	0	0	145.307	27.2877	49.4175	47.8219	199.935	25.3473	181.554	10.6197	0	11.6641
miR-193b-5p	45.0425	66.4356	152.338	82.3799	0	23.6463	119.753	0	435.477	112.547	394.302	30.2479	84.679	50.5518	19.4407	9.12492	158.154	46.2278	51.7495	28.5816	104.251	0	13.773	0	204.658	11.5308	4.34745	1692.78	15.4717	88.026	138.056	84.3811	11.6641
miR-29a-5p	45.0425	110.726	11.2843	29.0753	0	0	0	184.298	72.5795	0	98.5756	78.6444	58.6239	45.4966	31.105	18.2498	15.1655	0	18.482	14.2908	11.5835	0	41.3189	145.307	0	74.1263	47.8219	13.329	15.1425	63.2687	84.9573	126.572	93.3126
miR-30c-2-3p	45.0425	88.5808	78.9898	77.534	0	23.6463	119.753	0	145.159	18.7579	147.863	42.347	6.51377	25.2759	27.2169	27.3748	10.8325	0	22.1784	0	23.1669	50.2437	13.773	290.613	13.6439	24.7088	8.6949	13.329	10.8631	24.7573	201.773	84.3811	69.9844
miR-629-5p	45.0425	110.726	22.5685	9.69175	0	23.6463	59.8767	184.298	72.5795	0	0	120.991	71.6514	116.269	73.8745	36.4997	71.4943	46.2278	88.7134	28.5816	46.3338	50.2437	110.184	145.307	40.9316	8.23626	26.0847	6.66449	6.5837	19.2557	0	0	19.4401
miR-15a-3p	41.5777	22.1452	28.2107	24.2294	0	0	0	0	0	0	0	30.2479	52.1101	96.0484	34.9932	22.8123	58.4954	92.4556	14.7856	14.2908	11.5835	0	13.773	0	13.6439	415.107	121.729	106.632	127.395	189.806	371.688	210.953	419.907
miR-196b-5p	41.5777	33.2178	14.1053	19.3835	0	23.6463	59.8767	0	72.5795	93.7893	0	30.2479	78.1652	5.05518	73.8745	22.8123	30.3309	92.4556	25.8748	57.1633	11.5835	50.2437	41.3189	0	109.151	11.5308	47.8219	26.658	3.62104	214.563	84.9573	0	34.9922
miR-23b-5p	41.5777	66.4356	42.316	38.767	0	212.816	59.8767	0	290.318	112.547	197.151	12.0991	13.0275	15.1655	46.6576	36.4997	38.9969	0	11.0892	0	46.3338	50.2437	123.957	145.307	218.302	1.64725	8.6949	26.658	10.5339	5.50162	10.6197	0	3.88802
miR-425-3p	41.5777	66.4356	84.632	67.8423	0	70.9388	0	0	0	0	49.2878	42.347	32.5688	40.4414	46.6576	54.7495	67.1613	92.4556	40.6603	71.4541	46.3338	0	41.3189	0	54.5755	103.777	43.4745	46.6514	61.8868	35.7606	191.154	42.1905	77.7605
miR-1271-5p	38.1129	66.4356	50.7792	19.3835	0	0	59.8767	0	0	0	49.2878	48.3966	39.0826	207.262	15.5525	77.5618	177.653	0	181.123	57.1633	81.0842	100.487	27.5459	0	95.5071	29.6505	34.7796	19.9935	52.3404	16.5049	0	84.3811	11.6641
miR-19b-1-5p	38.1129	33.2178	47.9581	62.9964	0	70.9388	179.63	184.298	0	75.0314	49.2878	193.586	39.0826	65.7173	93.3151	54.7495	45.4964	46.2278	73.9279	71.4541	139.002	200.975	137.73	290.613	40.9316	156.489	113.034	159.948	81.6379	294.337	21.2393	84.3811	206.065
miR-335-3p	34.6481	5.5363	11.2843	19.3835	0	0	0	0	72.5795	56.2736	0	6.04957	6.51377	10.1104	34.9932	22.8123	8.66598	0	3.69639	14.2908	0	0	13.773	0	0	36.2395	52.1694	0	1.64593	88.026	53.0983	0	15.5521
miR-382-5p	34.6481	27.6815	39.4949	29.0753	533.903	94.585	0	0	145.159	18.7579	0	6.04957	71.6514	35.3862	7.77626	18.2498	12.999	0	29.5711	14.2908	0	0	0	0	27.2877	18.1198	17.3898	0	6.25452	0	10.6197	42.1905	15.5521
miR-508-3p	34.6481	55.363	33.8528	4.84588	0	0	239.507	0	0	18.7579	0	0	26.0551	0	3.88813	4.56246	4.33299	0	0	0	0	0	0	0	0	1.64725	0	0	54.9739	0	0	0	23.3281
miR-101-1-5p	31.1833	38.7541	11.2843	33.9211	533.903	23.6463	0	0	0	0	0	18.1487	52.1101	50.5518	15.5525	13.6874	23.8314	138.683	33.2675	57.1633	34.7504	50.2437	68.8648	145.307	54.5755	19.767	17.3898	0	10.5339	8.25244	31.859	168.762	23.3281
miR-134-5p	31.1833	16.6089	39.4949	19.3835	0	141.878	0	0	72.5795	56.2736	49.2878	18.1487	13.0275	0	19.4407	41.0621	6.49949	46.2278	22.1784	28.5816	0	0	0	0	109.151	6.589	17.3898	6.66449	7.24207	0	31.859	0	11.6641
miR-210-5p	31.1833	83.0445	31.0317	87.2258	0	0	59.8767	0	0	18.7579	98.5756	465.817	65.1377	101.104	85.5389	269.185	402.968	1201.92	354.854	128.617	498.089	653.168	275.459	1598.37	477.535	538.651	195.635	59.9804	802.553	170.55	403.547	1223.53	357.698
miR-216b-5p	31.1833	11.0726	36.6739	87.2258	0	0	179.63	0	0	0	49.2878	12.0991	0	0	0	0	0	0	0	0	0	0	0	0	0	0	0	0	1.97511	0	0	0	0
miR-301a-5p	31.1833	5.5363	5.64213	29.0753	0	47.2925	0	0	145.159	0	0	18.1487	13.0275	15.1655	7.77626	0	12.999	0	14.7856	42.8725	11.5835	0	0	0	0	14.8253	8.6949	6.66449	7.24207	16.5049	10.6197	84.3811	0
miR-374a-5p	31.1833	66.4356	25.3896	29.0753	0	23.6463	59.8767	0	72.5795	150.063	98.5756	18.1487	13.0275	30.3311	69.9864	36.4997	19.4985	92.4556	18.482	28.5816	150.585	301.462	82.6378	290.613	122.795	23.0615	4.34745	0	2.63348	0	0	0	38.8802
miR-379-5p	31.1833	22.1452	25.3896	9.69175	0	0	0	184.298	0	37.5157	49.2878	6.04957	52.1101	5.05518	15.5525	0	10.8325	0	14.7856	57.1633	0	0	41.3189	0	27.2877	13.178	13.0423	0	5.92533	0	10.6197	0	31.1042
miR-452-5p	31.1833	55.363	39.4949	43.6129	533.903	165.524	0	184.298	0	18.7579	98.5756	895.336	338.716	80.8828	89.427	223.561	487.461	323.595	229.176	114.327	185.335	150.731	220.367	290.613	313.809	194.376	321.711	166.612	152.413	486.894	1284.98	548.477	474.339
miR-652-5p	31.1833	94.1171	50.7792	19.3835	0	0	0	0	0	56.2736	49.2878	30.2479	19.5413	30.3311	34.9932	45.6246	108.325	0	40.6603	42.8725	46.3338	0	0	0	0	294.858	191.288	39.9869	154.388	110.032	138.056	337.524	326.594
miR-671-3p	31.1833	27.6815	33.8528	19.3835	0	0	59.8767	0	0	37.5157	98.5756	0	19.5413	10.1104	38.8813	22.8123	28.1644	0	7.39279	28.5816	23.1669	0	0	0	13.6439	6.589	4.34745	33.3224	3.95022	19.2557	10.6197	0	3.88802
miR-1287-5p	27.7185	5.5363	28.2107	19.3835	0	47.2925	59.8767	0	0	37.5157	0	54.4461	13.0275	10.1104	15.5525	13.6874	15.1655	0	59.1423	28.5816	46.3338	0	0	0	13.6439	13.178	13.0423	19.9935	14.155	11.0032	0	0	7.77605
miR-1296-5p	27.7185	71.9719	14.1053	4.84588	0	0	119.753	0	0	225.094	0	24.1983	39.0826	35.3862	15.5525	18.2498	6.49949	0	3.69639	0	11.5835	0	13.773	0	40.9316	13.178	21.7372	0	6.25452	16.5049	0	42.1905	3.88802
miR-19b-1-3p	27.7185	38.7541	5.64213	14.5376	0	0	0	0	0	0	0	6.04957	6.51377	40.4414	31.105	0	6.49949	0	11.0892	0	0	0	0	0	0	186.139	13.0423	13.329	8.22963	90.7768	31.859	84.3811	225.505
miR-19b-2-3p	27.7185	55.363	14.1053	14.5376	0	23.6463	0	0	0	18.7579	0	6.04957	71.6514	40.4414	58.322	4.56246	6.49949	0	3.69639	0	11.5835	0	13.773	0	40.9316	161.431	52.1694	86.6384	7.57126	99.0292	53.0983	84.3811	128.305
miR-217-3p	27.7185	5.5363	14.1053	58.1505	0	0	0	0	0	0	0	6.04957	6.51377	0	0	0	4.33299	0	3.69639	0	11.5835	0	0	0	0	3.2945	0	0	2.3043	0	21.2393	0	19.4401
miR-28-5p	27.7185	33.2178	186.19	135.685	0	118.231	59.8767	368.596	0	75.0314	0	260.132	104.22	70.7725	27.2169	187.061	220.983	92.4556	133.07	228.653	139.002	150.731	110.184	145.307	177.37	113.66	113.034	33.3224	34.2353	79.7736	361.068	210.953	221.617
miR-375-3p	27.7185	5.5363	2.82107	4.84588	0	283.755	0	0	145.159	75.0314	49.2878	0	45.5964	5.05518	66.0982	0	8.66598	0	7.39279	28.5816	0	0	0	0	0	1.64725	0	0	0	2.75081	0	0	0
miR-483-5p	27.7185	11.0726	16.9264	9.69175	0	0	0	0	0	0	246.439	0	6.51377	0	0	0	0	0	0	0	23.1669	0	0	0	0	3.2945	4.34745	0	2.3043	0	0	421.905	3.88802
miR-493-5p	27.7185	49.8267	11.2843	0	0	23.6463	0	184.298	0	18.7579	49.2878	6.04957	6.51377	45.4966	11.6644	18.2498	0	0	29.5711	71.4541	0	50.2437	55.0919	0	0	3.2945	0	0	0.65837	0	0	0	0
miR-577-5p	27.7185	155.016	172.085	96.9175	533.903	23.6463	239.507	368.596	72.5795	75.0314	49.2878	30.2479	6.51377	20.2207	19.4407	18.2498	12.999	46.2278	18.482	57.1633	34.7504	50.2437	27.5459	0	13.6439	31.2978	0	0	10.2047	55.0162	0	0	42.7683
miR-154-3p	24.2537	16.6089	19.7475	4.84588	0	23.6463	0	0	0	0	0	6.04957	97.7065	20.2207	7.77626	9.12492	2.1665	0	14.7856	14.2908	11.5835	0	0	0	27.2877	21.4143	4.34745	0	3.62104	0	0	0	11.6641
miR-154-5p	24.2537	0	0	0	0	0	0	0	0	0	0	0	6.51377	10.1104	0	0	0	0	0	14.2908	0	0	0	0	13.6439	3.2945	0	0	1.97511	0	0	0	0
miR-194-2-3p	24.2537	27.6815	73.3477	43.6129	0	23.6463	59.8767	184.298	435.477	93.7893	0	24.1983	13.0275	10.1104	15.5525	0	30.3309	0	3.69639	0	11.5835	0	68.8648	0	27.2877	6.589	0	0	4.27941	5.50162	0	0	3.88802
miR-199a-2-3p	24.2537	27.6815	14.1053	14.5376	0	23.6463	0	0	0	0	0	0	6.51377	10.1104	11.6644	9.12492	0	0	3.69639	0	11.5835	0	13.773	0	0	6.589	0	0	1.31674	0	0	0	23.3281
miR-26b-3p	24.2537	22.1452	11.2843	24.2294	0	23.6463	0	0	0	18.7579	147.863	42.347	6.51377	15.1655	7.77626	31.9372	10.8325	0	22.1784	28.5816	0	0	0	145.307	0	14.8253	13.0423	0	10.5339	13.7541	42.4786	0	3.88802
miR-30b-3p	24.2537	66.4356	33.8528	62.9964	0	23.6463	59.8767	0	217.738	225.094	49.2878	24.1983	6.51377	15.1655	11.6644	45.6246	12.999	0	25.8748	42.8725	0	0	68.8648	0	54.5755	14.8253	8.6949	6.66449	0.987555	19.2557	148.675	84.3811	27.2162
miR-339-3p	24.2537	71.9719	73.3477	67.8423	0	141.878	0	184.298	290.318	112.547	345.015	157.289	104.22	70.7725	23.3288	63.8744	97.4923	184.911	158.945	128.617	92.6677	50.2437	82.6378	435.92	163.726	260.266	65.2117	13.329	62.5452	77.0227	297.35	84.3811	112.753
miR-585-3p	24.2537	0	11.2843	24.2294	0	0	0	0	0	18.7579	0	0	0	0	0	41.0621	2.1665	0	25.8748	0	0	0	13.773	0	0	9.88351	4.34745	0	19.7511	0	10.6197	42.1905	0
miR-589-3p	24.2537	11.0726	25.3896	19.3835	0	0	0	0	0	0	0	18.1487	0	0	7.77626	13.6874	21.665	0	14.7856	28.5816	0	0	0	145.307	13.6439	8.23626	8.6949	6.66449	3.95022	2.75081	0	0	0
miR-628-5p	24.2537	44.2904	93.0952	58.1505	0	0	179.63	0	72.5795	56.2736	49.2878	36.2974	19.5413	20.2207	31.105	31.9372	51.9959	46.2278	18.482	28.5816	81.0842	50.2437	55.0919	0	68.2193	42.8285	26.0847	19.9935	32.9185	27.5081	74.3376	42.1905	81.6485
miR-769-5p	24.2537	71.9719	25.3896	0	0	23.6463	239.507	184.298	72.5795	93.7893	49.2878	66.5453	32.5688	131.435	69.9864	22.8123	43.3299	0	77.6243	14.2908	115.835	50.2437	96.4108	0	68.2193	69.1845	34.7796	0	6.5837	41.2622	74.3376	126.572	50.5443
miR-891a-5p	24.2537	110.726	67.7056	53.3046	0	23.6463	119.753	184.298	0	412.673	246.439	0	286.606	0	0	0	0	0	73.9279	0	0	0	0	0	0	0	0	0	6.91289	0	10.6197	0	7.77605
let-7g-3p	20.7889	27.6815	5.64213	9.69175	0	23.6463	0	0	0	0	0	6.04957	19.5413	35.3862	54.4338	9.12492	28.1644	0	7.39279	14.2908	0	0	0	0	0	21.4143	26.0847	0	13.8258	22.0065	42.4786	42.1905	23.3281
miR-103-1-3p	20.7889	38.7541	22.5685	29.0753	0	0	59.8767	0	72.5795	0	49.2878	66.5453	58.6239	20.2207	11.6644	27.3748	25.9979	46.2278	40.6603	85.7449	11.5835	0	27.5459	0	13.6439	16.4725	17.3898	13.329	7.57126	41.2622	148.675	0	50.5443
miR-136-3p	20.7889	11.0726	8.4632	4.84588	0	23.6463	0	0	0	0	0	6.04957	6.51377	15.1655	3.88813	0	0	0	7.39279	0	34.7504	0	0	0	0	56.0065	8.6949	0	5.26696	0	10.6197	0	108.865
miR-148b-5p	20.7889	16.6089	16.9264	9.69175	0	23.6463	0	0	0	0	0	6.04957	13.0275	5.05518	31.105	4.56246	12.999	46.2278	7.39279	42.8725	0	0	0	0	0	6.589	4.34745	13.329	18.1052	49.5146	0	0	7.77605
miR-181d-5p	20.7889	22.1452	0	0	0	0	0	0	0	0	0	0	32.5688	25.2759	11.6644	9.12492	6.49949	0	0	14.2908	0	0	0	0	0	69.1845	8.6949	13.329	2.3043	41.2622	21.2393	42.1905	34.9922
miR-183-3p	20.7889	27.6815	19.7475	33.9211	0	47.2925	0	0	0	37.5157	147.863	12.0991	58.6239	0	31.105	0	34.6639	0	18.482	42.8725	0	0	27.5459	0	0	0	0	106.632	2.63348	30.2589	10.6197	0	0
miR-29b-1-5p	20.7889	5.5363	33.8528	33.9211	0	0	0	0	0	0	0	18.1487	13.0275	10.1104	11.6644	22.8123	58.4954	0	7.39279	57.1633	0	0	0	145.307	13.6439	0	8.6949	19.9935	0.329185	49.5146	0	0	0
miR-320b-1-5p	20.7889	5.5363	5.64213	4.84588	0	0	0	0	0	0	0	6.04957	0	5.05518	7.77626	0	4.33299	0	3.69639	0	0	0	0	0	13.6439	1.64725	8.6949	26.658	2.63348	5.50162	0	84.3811	3.88802
miR-32-5p	20.7889	11.0726	16.9264	33.9211	0	0	0	0	0	56.2736	0	36.2974	6.51377	20.2207	77.7626	27.3748	25.9979	138.683	0	0	11.5835	50.2437	55.0919	0	27.2877	88.9516	43.4745	6.66449	23.043	63.2687	10.6197	84.3811	202.177
miR-331-5p	20.7889	44.2904	19.7475	19.3835	0	47.2925	0	0	145.159	0	0	24.1983	45.5964	30.3311	58.322	41.0621	49.8294	0	33.2675	28.5816	0	0	13.773	0	27.2877	29.6505	21.7372	66.6449	11.5215	35.7606	10.6197	0	15.5521
miR-382-3p	20.7889	0	2.82107	0	0	0	0	0	0	37.5157	0	0	71.6514	15.1655	7.77626	31.9372	4.33299	0	7.39279	14.2908	23.1669	0	0	0	0	1.64725	8.6949	0	3.29185	0	0	0	15.5521
miR-582-3p	20.7889	16.6089	5.64213	19.3835	0	23.6463	0	0	0	0	0	42.347	0	5.05518	0	0	0	46.2278	3.69639	0	11.5835	0	68.8648	0	0	0	0	0	2.96267	8.25244	0	42.1905	0
miR-654-3p	20.7889	5.5363	11.2843	9.69175	0	47.2925	0	0	0	0	0	0	26.0551	15.1655	7.77626	13.6874	6.49949	0	18.482	42.8725	11.5835	50.2437	0	0	27.2877	4.94175	4.34745	0	5.92533	0	0	0	7.77605
let-7c-3p	17.3241	16.6089	16.9264	38.767	0	23.6463	0	0	0	18.7579	0	18.1487	0	0	46.6576	13.6874	2.1665	0	7.39279	28.5816	11.5835	50.2437	13.773	0	13.6439	0	0	13.329	5.59615	8.25244	0	0	3.88802
miR-1257-5p	17.3241	38.7541	11.2843	4.84588	0	0	0	0	0	0	0	18.1487	39.0826	15.1655	11.6644	0	15.1655	323.595	11.0892	28.5816	0	0	0	0	0	0	0	0	0	2.75081	0	0	0
miR-129-1-3p	17.3241	60.8993	28.2107	19.3835	0	0	0	0	0	0	49.2878	6.04957	6.51377	0	0	4.56246	0	0	0	0	0	0	0	0	0	0	0	0	1.31674	0	0	0	19.4401
miR-1292-5p	17.3241	5.5363	14.1053	4.84588	0	0	0	0	0	56.2736	49.2878	18.1487	19.5413	10.1104	0	9.12492	8.66598	46.2278	3.69639	0	34.7504	0	0	145.307	0	4.94175	13.0423	6.66449	6.25452	22.0065	10.6197	0	0
miR-143-5p	17.3241	22.1452	31.0317	19.3835	0	0	59.8767	0	0	37.5157	0	18.1487	65.1377	65.7173	7.77626	68.4369	10.8325	46.2278	33.2675	14.2908	23.1669	0	27.5459	0	54.5755	255.324	108.686	0	35.2228	8.25244	180.534	253.143	182.737
miR-196a-1-3p	17.3241	38.7541	53.6002	24.2294	0	47.2925	0	0	0	0	0	0	0	0	27.2169	0	19.4985	0	33.2675	0	46.3338	0	0	0	0	93.8933	52.1694	0	2.96267	66.0195	10.6197	0	7.77605
miR-206-3p	17.3241	22.1452	70.5266	43.6129	0	23.6463	59.8767	184.298	0	18.7579	0	0	0	0	0	0	0	0	0	0	0	0	0	0	0	0	0	0	0.329185	0	42.4786	0	3.88802
miR-20b-3p	17.3241	49.8267	50.7792	48.4588	0	0	59.8767	184.298	0	0	0	0	6.51377	0	0	9.12492	2.1665	0	7.39279	0	0	0	55.0919	0	0	13.178	0	6.66449	5.26696	16.5049	10.6197	0	42.7683
miR-2110-3p	17.3241	22.1452	59.2424	116.301	0	70.9388	119.753	184.298	72.5795	0	147.863	36.2974	45.5964	20.2207	34.9932	50.1871	56.3289	0	22.1784	14.2908	23.1669	0	13.773	0	81.8632	8.23626	8.6949	19.9935	11.5215	11.0032	10.6197	0	3.88802
miR-212-3p	17.3241	22.1452	14.1053	29.0753	0	70.9388	59.8767	0	0	37.5157	0	24.1983	32.5688	25.2759	23.3288	27.3748	4.33299	46.2278	11.0892	42.8725	11.5835	0	27.5459	0	27.2877	3.2945	13.0423	6.66449	7.24207	0	0	42.1905	0
miR-299-5p	17.3241	16.6089	8.4632	9.69175	0	47.2925	0	0	0	0	0	0	39.0826	35.3862	7.77626	4.56246	0	0	3.69639	28.5816	0	0	0	0	27.2877	4.94175	0	0	3.95022	0	21.2393	0	27.2162
miR-320d-2-3p	17.3241	5.5363	8.4632	19.3835	0	23.6463	59.8767	0	0	0	0	6.04957	13.0275	20.2207	15.5525	27.3748	21.665	46.2278	3.69639	42.8725	23.1669	0	0	0	68.2193	9.88351	21.7372	13.329	5.26696	0	0	210.953	7.77605
miR-324-3p	17.3241	22.1452	8.4632	53.3046	0	47.2925	0	184.298	0	18.7579	0	24.1983	32.5688	25.2759	7.77626	4.56246	23.8314	0	36.9639	28.5816	0	0	27.5459	0	27.2877	26.356	13.0423	0	14.8133	22.0065	63.7179	42.1905	15.5521
miR-337-3p	17.3241	33.2178	8.4632	9.69175	0	141.878	0	184.298	0	0	147.863	0	65.1377	40.4414	38.8813	4.56246	8.66598	0	14.7856	28.5816	46.3338	0	27.5459	0	81.8632	14.8253	13.0423	0	3.29185	0	0	84.3811	15.5521
miR-342-5p	17.3241	27.6815	70.5266	96.9175	0	23.6463	0	0	72.5795	168.821	197.151	96.7931	143.303	40.4414	50.5457	123.186	212.317	184.911	336.372	71.4541	46.3338	150.731	55.0919	145.307	95.5071	72.479	99.9913	6.66449	67.8121	66.0195	307.97	84.3811	58.3204
miR-370-3p	17.3241	0	0	24.2294	0	0	0	0	145.159	18.7579	0	0	6.51377	5.05518	0	4.56246	6.49949	0	3.69639	0	11.5835	0	0	0	0	4.94175	4.34745	0	2.3043	0	42.4786	126.572	19.4401
miR-411-5p	17.3241	22.1452	11.2843	0	0	47.2925	0	0	0	18.7579	0	6.04957	26.0551	10.1104	15.5525	31.9372	8.66598	0	14.7856	28.5816	0	0	13.773	0	0	32.945	0	0	13.1674	0	0	42.1905	34.9922
miR-454-5p	17.3241	11.0726	16.9264	19.3835	0	0	0	0	0	0	0	6.04957	19.5413	15.1655	27.2169	36.4997	23.8314	0	25.8748	14.2908	0	0	13.773	0	54.5755	8.23626	17.3898	113.296	26.0056	60.5179	10.6197	0	3.88802
miR-503-5p	17.3241	33.2178	22.5685	4.84588	0	94.585	59.8767	0	0	18.7579	0	60.4957	286.606	247.704	19.4407	31.9372	75.8273	46.2278	88.7134	57.1633	115.835	50.2437	55.0919	145.307	13.6439	228.968	230.415	53.3159	45.0984	250.324	0	0	171.073
miR-7-2-3p	17.3241	33.2178	14.1053	24.2294	0	0	0	0	0	0	0	0	0	0	7.77626	4.56246	12.999	0	11.0892	0	34.7504	0	0	0	27.2877	16.4725	4.34745	0	5.26696	0	0	42.1905	15.5521
miR-744-3p	17.3241	38.7541	33.8528	53.3046	0	0	59.8767	0	0	56.2736	49.2878	42.347	6.51377	15.1655	23.3288	9.12492	25.9979	46.2278	11.0892	0	0	0	0	0	0	9.88351	4.34745	19.9935	8.22963	13.7541	21.2393	0	11.6641
miR-888-5p	17.3241	16.6089	2.82107	0	0	0	0	0	0	18.7579	49.2878	0	13.0275	0	0	0	0	0	0	0	0	0	0	0	0	0	0	0	1.97511	0	0	0	3.88802
miR-92a-1-5p	17.3241	38.7541	25.3896	87.2258	0	23.6463	59.8767	184.298	0	0	49.2878	30.2479	26.0551	0	19.4407	27.3748	15.1655	0	3.69639	71.4541	57.9173	0	13.773	145.307	13.6439	14.8253	8.6949	26.658	9.87555	126.537	63.7179	42.1905	11.6641
miR-107-5p	13.8592	16.6089	25.3896	67.8423	0	0	0	0	72.5795	56.2736	98.5756	6.04957	13.0275	5.05518	7.77626	0	4.33299	46.2278	0	0	0	0	0	0	0	18.1198	4.34745	13.329	19.4219	33.0097	42.4786	0	81.6485
miR-125a-3p	13.8592	38.7541	62.0634	33.9211	0	0	0	0	0	56.2736	0	6.04957	13.0275	5.05518	7.77626	22.8123	23.8314	92.4556	22.1784	57.1633	11.5835	0	0	0	0	39.534	34.7796	6.66449	12.509	74.2719	148.675	295.334	108.865
miR-181b-2-3p	13.8592	16.6089	14.1053	4.84588	0	0	59.8767	0	0	0	0	18.1487	0	5.05518	31.105	31.9372	43.3299	92.4556	0	0	23.1669	0	0	0	0	19.767	4.34745	39.9869	10.8631	96.2784	31.859	0	151.633
miR-181c-3p	13.8592	16.6089	19.7475	24.2294	0	70.9388	0	0	72.5795	0	49.2878	66.5453	13.0275	10.1104	27.2169	77.5618	28.1644	0	48.0531	28.5816	0	0	0	0	0	98.8351	82.6015	26.658	60.2409	79.7736	116.816	421.905	124.417
miR-196a-1-5p	13.8592	0	0	9.69175	0	0	0	0	0	0	49.2878	6.04957	6.51377	5.05518	7.77626	4.56246	10.8325	46.2278	22.1784	0	0	0	0	0	0	1.64725	0	0	0	5.50162	0	0	0
miR-1974-5p	13.8592	11.0726	2.82107	9.69175	0	0	59.8767	184.298	0	37.5157	0	12.0991	0	0	0	0	0	0	0	0	0	0	0	0	0	3.2945	8.6949	0	1.64593	0	0	0	3.88802
miR-203-5p	13.8592	11.0726	8.4632	0	0	0	0	0	0	0	0	0	0	0	7.77626	0	2.1665	0	3.69639	0	0	0	0	0	0	0	0	0	0.329185	11.0032	0	0	0
miR-32-3p	13.8592	5.5363	19.7475	4.84588	0	23.6463	0	0	72.5795	37.5157	0	6.04957	6.51377	20.2207	15.5525	0	4.33299	0	3.69639	0	11.5835	0	27.5459	0	40.9316	8.23626	4.34745	0	0.987555	13.7541	10.6197	0	19.4401
miR-337-5p	13.8592	16.6089	2.82107	4.84588	0	23.6463	0	0	0	0	0	24.1983	19.5413	10.1104	11.6644	0	2.1665	0	3.69639	57.1633	0	0	0	0	0	36.2395	0	0	11.5215	0	0	84.3811	136.081
miR-34b-5p	13.8592	5.5363	0	9.69175	0	0	0	0	0	0	0	0	117.248	30.3311	34.9932	0	17.332	0	7.39279	28.5816	23.1669	50.2437	0	0	0	29.6505	34.7796	6.66449	12.8382	5.50162	520.363	126.572	31.1042
miR-369-5p	13.8592	11.0726	8.4632	4.84588	0	70.9388	0	0	72.5795	0	0	0	6.51377	5.05518	7.77626	4.56246	0	0	0	14.2908	23.1669	0	0	0	0	28.0033	0	0	1.64593	0	10.6197	126.572	15.5521
miR-409-5p	13.8592	5.5363	2.82107	4.84588	0	23.6463	179.63	0	0	0	0	12.0991	6.51377	25.2759	11.6644	9.12492	2.1665	0	14.7856	0	0	0	0	0	0	3.2945	4.34745	0	3.29185	2.75081	0	42.1905	23.3281
miR-503-3p	13.8592	5.5363	5.64213	14.5376	0	0	0	0	0	18.7579	0	18.1487	6.51377	10.1104	7.77626	4.56246	12.999	46.2278	25.8748	14.2908	11.5835	50.2437	13.773	0	0	1.64725	0	13.329	3.62104	2.75081	0	0	3.88802
miR-551b-3p	13.8592	33.2178	14.1053	33.9211	0	0	59.8767	0	0	0	49.2878	0	0	40.4414	233.288	0	12.999	184.911	7.39279	0	0	0	0	0	0	21.4143	0	6.66449	20.0803	11.0032	0	0	46.6563
miR-579-3p	13.8592	5.5363	0	0	0	0	0	0	0	0	0	6.04957	13.0275	25.2759	7.77626	4.56246	8.66598	0	3.69639	14.2908	11.5835	0	13.773	0	0	3.2945	21.7372	33.3224	11.8507	19.2557	0	0	0
miR-627-5p	13.8592	16.6089	19.7475	24.2294	0	0	59.8767	0	0	0	0	36.2974	0	5.05518	15.5525	22.8123	8.66598	0	14.7856	14.2908	0	0	27.5459	0	27.2877	16.4725	13.0423	13.329	11.8507	8.25244	21.2393	0	19.4401
miR-656-3p	13.8592	16.6089	5.64213	9.69175	533.903	0	0	0	0	18.7579	0	0	13.0275	10.1104	11.6644	9.12492	0	0	3.69639	0	0	0	0	0	0	3.2945	0	0	2.63348	0	0	0	7.77605
miR-98-3p	13.8592	49.8267	2.82107	9.69175	0	0	0	0	0	0	49.2878	6.04957	13.0275	15.1655	11.6644	31.9372	8.66598	0	22.1784	14.2908	11.5835	0	13.773	0	0	8.23626	8.6949	19.9935	9.87555	13.7541	10.6197	0	15.5521
miR-106a-3p	10.3944	22.1452	5.64213	0	0	0	0	0	0	0	0	0	13.0275	5.05518	0	0	0	0	0	0	0	0	0	0	0	0	4.34745	0	2.96267	0	0	0	23.3281
miR-1226-3p	10.3944	11.0726	14.1053	14.5376	0	0	59.8767	0	145.159	56.2736	49.2878	12.0991	6.51377	10.1104	0	0	4.33299	46.2278	14.7856	0	11.5835	0	27.5459	0	0	6.589	4.34745	6.66449	4.60859	2.75081	0	0	0
miR-1227-3p	10.3944	0	11.2843	33.9211	0	0	0	0	145.159	56.2736	0	6.04957	6.51377	5.05518	0	0	6.49949	0	11.0892	0	0	0	0	0	0	4.94175	4.34745	26.658	4.27941	2.75081	10.6197	0	3.88802
miR-1228-3p	10.3944	5.5363	2.82107	0	0	0	0	0	0	0	0	0	19.5413	20.2207	3.88813	9.12492	6.49949	0	29.5711	42.8725	0	150.731	0	0	13.6439	4.94175	8.6949	0	1.64593	0	0	0	0
miR-1234-3p	10.3944	0	0	0	0	0	0	0	0	0	0	0	0	5.05518	0	0	2.1665	0	0	0	11.5835	0	0	0	13.6439	0	0	0	0.329185	0	0	0	0
miR-1307-5p	10.3944	11.0726	0	4.84588	0	0	0	0	0	0	0	0	19.5413	15.1655	31.105	4.56246	10.8325	0	0	0	0	0	0	0	0	6.589	4.34745	19.9935	4.93778	11.0032	0	0	7.77605
miR-130b-5p	10.3944	5.5363	14.1053	9.69175	0	23.6463	59.8767	0	0	0	49.2878	12.0991	13.0275	20.2207	15.5525	31.9372	8.66598	0	44.3567	28.5816	11.5835	0	0	145.307	13.6439	16.4725	26.0847	6.66449	7.24207	33.0097	84.9573	295.334	19.4401
miR-138-1-3p	10.3944	16.6089	50.7792	43.6129	0	0	0	0	217.738	0	0	0	0	0	3.88813	0	15.1655	0	0	0	0	0	0	0	0	1.64725	0	86.6384	3.62104	0	0	0	3.88802
miR-148a-5p	10.3944	11.0726	11.2843	0	0	0	0	0	0	0	49.2878	24.1983	13.0275	10.1104	34.9932	0	21.665	0	25.8748	28.5816	23.1669	50.2437	13.773	0	0	6.589	13.0423	0	6.5837	0	0	0	0
miR-184-3p	10.3944	0	121.306	9.69175	0	0	0	0	72.5795	18.7579	98.5756	0	0	0	0	0	4.33299	0	0	0	0	0	0	0	0	0	0	0	6.25452	0	0	0	11.6641
miR-186-3p	10.3944	0	0	0	0	0	0	0	0	0	0	6.04957	0	5.05518	0	0	4.33299	0	0	0	0	0	0	0	0	32.945	34.7796	0	1.64593	5.50162	53.0983	0	66.0964
miR-23a-5p	10.3944	0	11.2843	24.2294	0	0	119.753	0	0	37.5157	0	12.0991	6.51377	10.1104	27.2169	22.8123	17.332	46.2278	7.39279	28.5816	34.7504	0	68.8648	0	0	1.64725	21.7372	6.66449	2.63348	41.2622	10.6197	210.953	7.77605
miR-26a-1-5p	10.3944	11.0726	5.64213	4.84588	0	0	0	0	0	18.7579	0	0	13.0275	5.05518	11.6644	0	2.1665	0	0	0	0	0	0	0	0	1.64725	0	0	0	0	0	0	3.88802
miR-320c-2-3p	10.3944	27.6815	16.9264	4.84588	0	47.2925	59.8767	0	0	0	0	6.04957	26.0551	35.3862	11.6644	18.2498	4.33299	46.2278	3.69639	100.036	11.5835	0	0	145.307	54.5755	4.94175	8.6949	6.66449	3.62104	16.5049	0	0	7.77605
miR-369-3p	10.3944	5.5363	0	0	0	0	0	0	0	18.7579	0	0	6.51377	0	0	0	0	0	0	0	0	0	0	0	27.2877	0	0	0	0.329185	0	0	0	3.88802
miR-450a-2-3p	10.3944	5.5363	31.0317	4.84588	0	0	0	0	0	18.7579	0	6.04957	0	5.05518	3.88813	4.56246	8.66598	0	0	0	11.5835	100.487	0	0	0	0	0	0	2.96267	0	0	0	3.88802
miR-506-3p	10.3944	22.1452	19.7475	4.84588	0	23.6463	59.8767	0	0	37.5157	0	0	0	0	7.77626	4.56246	0	0	0	0	0	0	0	0	0	0	0	0	17.776	0	0	0	3.88802
miR-509-3-5p	10.3944	38.7541	22.5685	4.84588	0	0	0	0	0	0	0	6.04957	0	0	7.77626	0	0	0	0	0	0	0	0	0	0	3.2945	0	0	9.21718	0	0	0	3.88802
miR-510-5p	10.3944	11.0726	16.9264	0	0	23.6463	0	0	72.5795	37.5157	0	0	0	0	0	4.56246	0	0	0	0	0	0	0	0	0	0	0	0	9.21718	0	0	0	3.88802
miR-539-5p	10.3944	5.5363	0	0	0	0	0	0	0	18.7579	0	0	13.0275	5.05518	0	0	2.1665	0	0	0	0	0	27.5459	0	40.9316	1.64725	0	0	1.31674	0	0	0	3.88802
miR-584-5p	10.3944	0	0	9.69175	0	0	59.8767	0	0	0	0	0	19.5413	5.05518	0	36.4997	0	0	0	0	57.9173	0	41.3189	0	13.6439	3.2945	0	6.66449	2.3043	5.50162	0	0	0
miR-592-5p	10.3944	5.5363	5.64213	0	0	23.6463	0	0	0	0	0	24.1983	32.5688	30.3311	50.5457	13.6874	0	46.2278	70.2315	14.2908	23.1669	0	0	290.613	27.2877	21.4143	56.5168	0	0.65837	0	0	42.1905	19.4401
miR-653-5p	10.3944	5.5363	11.2843	9.69175	0	0	0	0	0	37.5157	0	18.1487	39.0826	0	0	4.56246	2.1665	46.2278	0	157.199	0	0	55.0919	0	13.6439	3.2945	8.6949	0	0.987555	5.50162	10.6197	0	15.5521
miR-654-5p	10.3944	11.0726	0	0	0	0	0	0	0	18.7579	49.2878	0	0	0	0	0	0	0	0	0	0	0	0	0	27.2877	0	4.34745	0	0.329185	0	0	0	0
miR-675-3p	10.3944	55.363	8.4632	4.84588	0	0	59.8767	0	0	18.7579	49.2878	0	0	0	0	9.12492	0	0	22.1784	28.5816	0	0	0	0	0	9.88351	113.034	0	4.27941	0	10.6197	84.3811	0
miR-708-5p	10.3944	0	284.928	455.512	0	141.878	299.383	1105.79	290.318	318.884	394.302	290.379	0	0	0	114.062	1323.73	138.683	328.979	285.816	104.251	0	206.594	145.307	136.439	84.0098	447.787	366.547	114.886	332.848	934.53	675.049	124.417
miR-769-3p	10.3944	0	2.82107	0	0	0	0	0	0	0	0	30.2479	6.51377	15.1655	15.5525	0	4.33299	0	14.7856	0	0	0	27.5459	0	27.2877	1.64725	4.34745	6.66449	1.31674	5.50162	10.6197	42.1905	3.88802
miR-876-5p	10.3944	5.5363	5.64213	0	0	0	0	0	0	0	0	0	6.51377	0	3.88813	0	0	0	0	0	0	0	0	0	0	1.64725	0	0	4.60859	0	0	0	0
miR-1-1-5p	6.92962	0	2.82107	0	0	0	0	0	0	0	0	6.04957	0	0	0	0	0	0	0	0	0	0	0	0	0	6.589	4.34745	0	6.5837	0	0	0	27.2162
miR-1180-5p	6.92962	5.5363	5.64213	0	0	23.6463	59.8767	0	0	0	49.2878	6.04957	0	5.05518	19.4407	4.56246	10.8325	0	7.39279	0	11.5835	0	0	0	0	0	4.34745	6.66449	1.97511	5.50162	0	0	3.88802
miR-1-2-3p	6.92962	11.0726	5.64213	0	0	0	0	0	0	0	0	0	0	0	0	13.6874	0	0	3.69639	42.8725	11.5835	0	0	0	13.6439	11.5308	0	0	0	0	0	0	3.88802
miR-1247-5p	6.92962	11.0726	67.7056	14.5376	0	0	179.63	368.596	0	56.2736	0	0	19.5413	0	3.88813	9.12492	41.1634	0	3.69639	14.2908	0	0	0	145.307	40.9316	278.385	2291.11	0	34.5644	2.75081	1667.29	84.3811	143.857
miR-127-5p	6.92962	5.5363	0	0	0	23.6463	0	184.298	0	0	0	0	19.5413	10.1104	3.88813	13.6874	2.1665	46.2278	7.39279	14.2908	11.5835	0	0	0	0	11.5308	17.3898	0	4.27941	0	21.2393	42.1905	58.3204
miR-128-2-3p	6.92962	27.6815	22.5685	9.69175	0	0	0	0	0	0	0	12.0991	0	5.05518	3.88813	0	0	0	59.1423	0	46.3338	0	0	0	0	0	0	6.66449	0.329185	2.75081	0	0	3.88802
miR-141-5p	6.92962	27.6815	2.82107	0	0	0	0	0	0	0	0	0	0	0	0	0	0	0	0	0	0	0	0	0	0	0	0	0	0.987555	2.75081	10.6197	0	0
miR-1468-3p	6.92962	0	0	4.84588	0	0	0	0	0	0	0	0	0	0	0	0	2.1665	0	0	0	0	0	0	0	0	0	0	0	0	0	0	0	0
miR-1468-5p	6.92962	16.6089	5.64213	19.3835	0	0	0	0	0	0	0	0	0	0	0	0	0	0	14.7856	0	0	0	0	0	0	1.64725	0	0	0.329185	0	0	0	0
miR-147b-3p	6.92962	0	2.82107	4.84588	0	0	0	0	0	0	0	42.347	13.0275	5.05518	3.88813	4.56246	0	0	0	28.5816	0	50.2437	0	0	0	6.589	4.34745	19.9935	9.87555	49.5146	53.0983	0	7.77605
miR-152-5p	6.92962	5.5363	0	0	0	0	0	0	0	0	0	12.0991	0	0	3.88813	0	0	0	0	0	0	0	41.3189	0	0	18.1198	17.3898	39.9869	5.26696	0	42.4786	0	34.9922
miR-20a-3p	6.92962	27.6815	14.1053	0	0	0	0	0	0	0	0	36.2974	78.1652	35.3862	89.427	27.3748	10.8325	92.4556	11.0892	28.5816	11.5835	100.487	27.5459	0	0	54.3593	52.1694	13.329	24.6889	55.0162	42.4786	42.1905	108.865
miR-223-5p	6.92962	0	2.82107	0	0	47.2925	0	0	0	0	0	12.0991	13.0275	5.05518	19.4407	13.6874	32.4974	184.911	0	0	0	0	27.5459	0	0	18.1198	13.0423	0	3.95022	2.75081	74.3376	42.1905	19.4401
miR-25-5p	6.92962	27.6815	14.1053	24.2294	0	0	0	0	0	37.5157	0	30.2479	0	30.3311	7.77626	18.2498	6.49949	0	7.39279	57.1633	0	50.2437	0	0	27.2877	8.23626	4.34745	46.6514	5.92533	90.7768	31.859	42.1905	7.77605
miR-26a-2-3p	6.92962	0	0	4.84588	0	23.6463	0	0	0	18.7579	0	0	13.0275	0	7.77626	0	4.33299	0	7.39279	42.8725	34.7504	0	13.773	0	0	9.88351	0	6.66449	1.64593	2.75081	10.6197	0	15.5521
miR-27a-5p	6.92962	11.0726	8.4632	9.69175	0	23.6463	0	0	0	0	0	6.04957	6.51377	20.2207	0	13.6874	15.1655	46.2278	3.69639	0	0	0	13.773	0	0	70.8318	52.1694	26.658	0.987555	49.5146	106.197	1012.57	93.3126
miR-296-3p	6.92962	0	5.64213	4.84588	0	0	0	0	0	0	0	0	6.51377	0	0	4.56246	8.66598	0	7.39279	28.5816	11.5835	0	0	0	0	4.94175	0	86.6384	3.95022	2.75081	21.2393	0	0
miR-30d-3p	6.92962	11.0726	2.82107	9.69175	0	47.2925	0	0	0	18.7579	0	18.1487	6.51377	0	3.88813	0	2.1665	0	3.69639	0	34.7504	0	0	0	0	0	0	0	2.63348	0	0	42.1905	15.5521
miR-33a-5p	6.92962	22.1452	2.82107	0	0	23.6463	59.8767	0	0	18.7579	0	12.0991	52.1101	35.3862	15.5525	18.2498	15.1655	46.2278	18.482	14.2908	11.5835	0	0	0	13.6439	41.1813	52.1694	33.3224	44.44	107.282	31.859	337.524	112.753
miR-34b-3p	6.92962	5.5363	5.64213	4.84588	0	47.2925	0	0	0	0	0	0	58.6239	0	15.5525	4.56246	8.66598	0	3.69639	0	23.1669	0	13.773	0	0	1.64725	13.0423	0	2.63348	0	31.859	0	7.77605
miR-381-3p	6.92962	11.0726	5.64213	0	0	47.2925	0	0	0	0	0	0	13.0275	15.1655	7.77626	0	2.1665	46.2278	0	14.2908	0	0	13.773	0	0	18.1198	8.6949	0	2.3043	2.75081	0	84.3811	42.7683
miR-449a-5p	6.92962	0	5.64213	0	0	0	0	0	0	0	0	0	0	0	7.77626	0	0	0	0	0	0	0	0	0	0	6.589	4.34745	0	2.3043	2.75081	0	0	0
miR-507-3p	6.92962	11.0726	0	0	0	23.6463	0	0	0	56.2736	0	0	0	0	0	0	0	0	0	0	0	0	0	0	0	0	0	0	5.92533	0	0	0	0
miR-589-5p	6.92962	22.1452	16.9264	4.84588	0	0	0	0	0	0	0	24.1983	19.5413	20.2207	23.3288	18.2498	15.1655	46.2278	11.0892	28.5816	0	0	27.5459	145.307	0	13.178	13.0423	13.329	6.91289	57.7671	21.2393	0	0
miR-615-5p	6.92962	5.5363	2.82107	0	0	0	0	0	0	0	0	6.04957	0	5.05518	7.77626	0	8.66598	0	3.69639	0	0	0	0	0	0	6.589	8.6949	0	0	2.75081	0	0	0
miR-641-5p	6.92962	5.5363	14.1053	29.0753	0	0	0	0	0	0	49.2878	18.1487	0	0	19.4407	22.8123	8.66598	0	11.0892	0	0	0	0	0	54.5755	6.589	0	6.66449	7.24207	16.5049	0	0	3.88802
miR-7-1-5p	6.92962	0	2.82107	0	0	0	0	0	0	18.7579	0	0	0	0	0	0	0	0	0	0	23.1669	0	0	0	0	0	0	13.329	0.329185	11.0032	0	0	0
miR-760-5p	6.92962	0	0	0	0	0	0	0	0	0	0	0	0	0	0	0	2.1665	0	3.69639	0	0	0	0	0	0	0	4.34745	0	0.329185	0	0	0	0
miR-934-3p	6.92962	60.8993	42.316	53.3046	0	0	59.8767	0	0	0	49.2878	0	0	0	3.88813	0	0	0	0	0	0	0	0	0	0	0	0	0	1.31674	0	0	0	23.3281
miR-940-3p	6.92962	0	0	0	0	0	0	0	0	0	0	0	0	15.1655	15.5525	13.6874	4.33299	0	7.39279	0	0	0	0	0	0	18.1198	47.8219	119.961	32.2601	71.5211	10.6197	126.572	19.4401
miR-942-3p	6.92962	5.5363	0	0	0	0	0	0	0	0	0	0	0	0	0	0	2.1665	0	0	0	0	0	0	0	0	1.64725	4.34745	6.66449	1.97511	2.75081	0	0	0
miR-101-2-5p	3.46481	0	0	0	0	0	0	0	0	0	0	0	0	0	0	0	0	0	0	0	0	0	0	0	0	0	0	0	0	0	10.6197	0	0
miR-1-1-3p	3.46481	11.0726	2.82107	4.84588	0	0	0	0	0	18.7579	0	0	0	5.05518	0	0	0	0	0	0	0	0	0	0	0	0	0	0	0.329185	2.75081	0	0	0
miR-122-5p	3.46481	0	0	0	0	23.6463	0	0	0	0	0	465.817	957.524	60.6621	0	82.1243	54.1624	184.911	646.869	1043.23	915.093	150.731	1459.93	1162.45	586.686	108.719	4.34745	0	3.29185	63.2687	53.0983	84.3811	50.5443
miR-1245-3p	3.46481	5.5363	2.82107	4.84588	0	0	0	0	0	0	0	12.0991	26.0551	5.05518	3.88813	0	4.33299	0	0	28.5816	0	0	0	0	0	0	0	0	0	0	0	0	0
miR-1247-3p	3.46481	0	8.4632	0	0	0	0	0	0	0	0	0	0	0	0	4.56246	0	0	0	0	0	0	0	0	0	0	4.34745	0	0	0	0	0	0
miR-1251-5p	3.46481	0	0	4.84588	0	0	0	0	0	0	0	6.04957	0	0	0	0	0	0	0	0	0	0	0	0	0	6.589	0	0	0.65837	0	0	0	11.6641
miR-1262-5p	3.46481	5.5363	5.64213	0	0	0	0	0	0	0	0	0	0	0	0	0	0	0	0	0	0	0	0	0	0	0	0	0	0.329185	0	0	0	0
miR-1296-3p	3.46481	0	0	0	0	0	0	0	0	0	0	0	0	0	0	0	0	0	0	0	0	0	0	0	0	0	0	0	0.329185	0	10.6197	0	3.88802
miR-135b-3p	3.46481	5.5363	0	0	0	23.6463	0	0	0	0	49.2878	12.0991	0	0	27.2169	0	15.1655	0	0	0	0	0	13.773	0	0	3.2945	8.6949	26.658	2.63348	8.25244	0	0	0
miR-150-3p	3.46481	0	2.82107	0	0	0	0	0	0	18.7579	0	0	0	5.05518	0	0	10.8325	0	0	14.2908	0	0	41.3189	0	0	3.2945	4.34745	0	0.65837	0	0	0	0
miR-181b-1-3p	3.46481	0	0	0	0	0	0	0	0	0	0	0	0	0	0	0	2.1665	0	3.69639	0	0	0	0	0	0	0	0	0	0	0	0	0	0
miR-182-3p	3.46481	0	0	0	0	0	0	0	0	0	0	0	0	0	7.77626	0	2.1665	0	0	0	0	0	0	0	0	6.589	0	6.66449	1.31674	52.2654	0	0	0
miR-188-3p	3.46481	16.6089	8.4632	4.84588	0	0	59.8767	0	0	0	0	0	0	5.05518	0	0	0	0	3.69639	0	0	0	0	0	0	11.5308	4.34745	0	7.90044	5.50162	10.6197	0	15.5521
miR-191-3p	3.46481	27.6815	0	9.69175	0	47.2925	59.8767	0	72.5795	0	0	0	0	0	7.77626	4.56246	2.1665	0	3.69639	0	0	0	0	0	27.2877	1.64725	4.34745	13.329	2.3043	5.50162	42.4786	0	0
miR-194-1-5p	3.46481	22.1452	16.9264	14.5376	0	0	59.8767	0	72.5795	18.7579	0	24.1983	26.0551	10.1104	11.6644	4.56246	21.665	0	0	14.2908	0	0	0	0	0	23.0615	0	0	2.3043	0	0	0	15.5521
miR-200c-5p	3.46481	0	0	0	0	0	0	0	0	0	0	0	0	0	0	0	0	0	0	0	0	0	0	0	0	1.64725	0	0	0	0	0	0	0
miR-205-5p	3.46481	387.541	2.82107	0	0	94.585	0	0	0	0	49.2878	0	19.5413	0	0	0	56.3289	0	3.69639	0	0	0	0	0	0	1.64725	0	6.66449	2.3043	0	53.0983	0	0
miR-218-2-3p	3.46481	0	0	0	0	0	0	0	0	0	0	6.04957	6.51377	0	0	0	0	0	3.69639	0	0	0	13.773	0	0	1.64725	0	0	2.63348	0	0	0	0
miR-222-5p	3.46481	0	0	4.84588	0	0	0	0	0	0	0	0	6.51377	0	3.88813	0	4.33299	0	3.69639	0	11.5835	0	13.773	0	0	6.589	8.6949	13.329	0.329185	93.5276	42.4786	210.953	15.5521
miR-301b-3p	3.46481	11.0726	8.4632	0	0	0	0	0	0	0	0	30.2479	65.1377	20.2207	11.6644	36.4997	21.665	184.911	33.2675	42.8725	46.3338	0	13.773	0	13.6439	19.767	21.7372	6.66449	4.60859	16.5049	0	0	23.3281
miR-320c-1-3p	3.46481	5.5363	8.4632	9.69175	0	0	59.8767	0	0	0	49.2878	0	26.0551	5.05518	7.77626	4.56246	12.999	0	3.69639	0	0	0	55.0919	0	13.6439	6.589	30.4321	6.66449	2.3043	5.50162	0	42.1905	19.4401
miR-326-3p	3.46481	16.6089	5.64213	9.69175	0	23.6463	59.8767	0	0	0	0	36.2974	6.51377	5.05518	7.77626	13.6874	19.4985	46.2278	3.69639	14.2908	23.1669	0	27.5459	0	0	44.4758	52.1694	19.9935	15.1425	11.0032	106.197	42.1905	31.1042
miR-33b-5p	3.46481	11.0726	0	0	0	0	0	0	0	0	0	42.347	13.0275	35.3862	15.5525	0	36.8304	184.911	59.1423	28.5816	11.5835	0	27.5459	0	0	36.2395	65.2117	0	14.155	5.50162	21.2393	42.1905	38.8802
miR-345-5p	3.46481	0	194.654	174.452	533.903	189.17	59.8767	184.298	72.5795	112.547	147.863	447.668	0	15.1655	11.6644	291.997	181.986	184.911	221.784	128.617	69.5008	200.975	179.049	145.307	177.37	121.897	134.771	26.658	176.114	55.0162	116.816	126.572	132.193
miR-346-5p	3.46481	5.5363	0	0	0	23.6463	0	0	0	0	0	0	32.5688	15.1655	7.77626	0	2.1665	0	11.0892	0	0	0	0	0	0	6.589	17.3898	0	2.63348	0	0	0	0
miR-34c-5p	3.46481	16.6089	2.82107	14.5376	0	47.2925	0	0	0	0	98.5756	6.04957	156.33	25.2759	66.0982	0	12.999	0	7.39279	0	0	0	0	0	0	24.7088	43.4745	6.66449	12.509	22.0065	446.026	0	27.2162
miR-380-5p	3.46481	5.5363	2.82107	0	0	23.6463	0	0	0	0	0	6.04957	0	0	11.6644	0	2.1665	0	0	14.2908	23.1669	0	41.3189	0	0	0	0	0	0	0	0	0	3.88802
miR-381-5p	3.46481	0	0	0	0	0	0	0	0	0	49.2878	0	0	0	3.88813	4.56246	0	0	3.69639	0	0	0	0	0	0	4.94175	0	0	2.63348	0	0	0	0
miR-431-5p	3.46481	0	0	4.84588	0	0	0	0	0	0	0	0	13.0275	10.1104	0	0	4.33299	46.2278	18.482	0	11.5835	0	0	0	0	3.2945	0	0	0.987555	0	0	0	0
miR-432-5p	3.46481	11.0726	8.4632	0	0	23.6463	0	0	0	0	49.2878	0	0	0	0	0	2.1665	0	0	28.5816	0	0	0	0	13.6439	0	0	0	0.65837	0	0	0	0
miR-433-3p	3.46481	0	0	0	0	0	0	0	0	0	0	0	6.51377	0	0	0	0	0	0	0	0	0	0	0	13.6439	4.94175	4.34745	0	1.97511	0	0	42.1905	0
miR-485-3p	3.46481	0	0	0	0	47.2925	0	0	0	0	0	0	0	0	0	0	0	0	0	0	0	0	0	0	0	1.64725	0	0	0.987555	0	0	0	3.88802
miR-485-5p	3.46481	5.5363	8.4632	0	0	0	0	0	0	0	0	0	0	0	0	0	0	0	3.69639	0	0	0	0	0	0	0	0	0	0	0	0	0	0
miR-489-5p	3.46481	11.0726	14.1053	4.84588	0	47.2925	0	0	72.5795	0	49.2878	42.347	26.0551	5.05518	7.77626	4.56246	6.49949	46.2278	7.39279	142.908	0	0	55.0919	0	0	19.767	186.94	0	4.93778	22.0065	10.6197	42.1905	54.4323
miR-491-5p	3.46481	0	0	4.84588	0	0	0	0	0	18.7579	0	6.04957	0	5.05518	0	9.12492	0	0	3.69639	0	0	0	0	0	0	6.589	0	0	0.987555	0	138.056	0	23.3281
miR-508-5p	3.46481	5.5363	16.9264	4.84588	0	23.6463	59.8767	0	0	0	0	0	0	0	3.88813	0	0	0	7.39279	0	0	0	0	0	0	0	0	0	105.998	2.75081	0	0	3.88802
miR-541-3p	3.46481	0	0	0	0	0	0	0	0	0	0	0	0	0	0	0	0	0	0	0	0	0	0	0	0	0	0	0	0	0	0	0	0
miR-545-5p	3.46481	0	5.64213	4.84588	0	0	0	0	0	0	0	6.04957	0	0	7.77626	13.6874	2.1665	0	3.69639	0	0	0	41.3189	0	13.6439	4.94175	4.34745	0	1.97511	5.50162	0	0	0
miR-548b-3p	3.46481	0	0	4.84588	0	0	0	0	0	0	0	0	0	0	0	0	0	0	0	0	0	0	0	0	0	0	0	0	0	0	0	0	3.88802
miR-548l-3p	3.46481	0	0	0	0	0	0	0	0	0	0	0	0	0	0	0	0	0	0	0	0	0	0	0	0	0	0	0	0	0	0	0	0
miR-551a-3p	3.46481	0	0	9.69175	0	0	0	0	0	0	0	6.04957	0	0	3.88813	0	4.33299	92.4556	3.69639	28.5816	0	0	0	0	13.6439	4.94175	0	0	2.96267	0	10.6197	42.1905	0
miR-574-5p	3.46481	0	0	0	0	0	0	0	0	0	0	0	0	0	0	0	0	0	0	0	0	0	0	0	0	3.2945	0	0	0	0	0	0	0
miR-585-5p	3.46481	5.5363	19.7475	9.69175	0	0	0	0	0	18.7579	0	6.04957	0	0	0	0	6.49949	0	22.1784	0	23.1669	0	13.773	0	13.6439	11.5308	0	0	16.1301	0	0	0	0
miR-588-5p	3.46481	0	0	0	0	0	0	0	0	0	0	0	0	0	0	0	0	0	0	0	0	0	0	0	0	0	0	0	0	0	0	0	0
miR-618-5p	3.46481	0	0	4.84588	0	0	0	0	0	0	0	18.1487	0	10.1104	0	0	4.33299	0	7.39279	0	0	0	41.3189	0	0	1.64725	13.0423	0	1.97511	2.75081	0	0	23.3281
miR-624-3p	3.46481	0	0	0	0	0	0	0	0	0	0	0	0	0	3.88813	0	0	46.2278	3.69639	0	0	0	0	0	0	4.94175	0	0	0	0	0	0	0
miR-636-3p	3.46481	0	0	0	0	0	0	0	0	0	0	0	0	5.05518	0	0	0	0	3.69639	0	0	0	0	0	0	0	0	6.66449	0.987555	0	0	0	0
miR-639-3p	3.46481	0	0	4.84588	0	0	0	0	0	0	0	0	0	0	0	0	0	0	0	0	0	0	0	0	0	0	0	0	0	0	0	0	0
miR-655-3p	3.46481	5.5363	0	0	0	0	0	0	0	0	0	0	0	5.05518	0	0	0	0	0	0	0	0	0	0	0	0	0	0	0.65837	0	0	0	3.88802
miR-668-3p	3.46481	5.5363	8.4632	4.84588	0	0	0	0	0	0	0	0	0	0	0	0	0	0	0	0	0	0	0	0	40.9316	0	0	0	0	0	0	0	0
miR-708-3p	3.46481	0	2.82107	0	0	0	0	0	0	0	0	0	0	10.1104	0	0	6.49949	0	3.69639	0	0	0	0	0	0	3.2945	8.6949	6.66449	0	13.7541	0	42.1905	7.77605
miR-7-3-5p	3.46481	0	0	0	0	0	0	0	0	0	0	0	6.51377	5.05518	0	0	0	0	0	0	0	0	0	0	0	0	4.34745	6.66449	0	5.50162	0	0	0
miR-876-3p	3.46481	0	5.64213	0	0	0	0	0	0	18.7579	0	12.0991	6.51377	0	0	0	0	92.4556	0	0	0	0	0	0	0	0	0	0	0	0	0	0	0
miR-889-3p	3.46481	0	2.82107	0	0	0	0	0	0	0	0	0	6.51377	0	0	0	0	0	0	0	0	0	0	0	0	0	0	0	0.329185	0	0	0	0
miR-891b-5p	3.46481	27.6815	8.4632	4.84588	0	0	0	0	0	0	98.5756	0	71.6514	0	0	4.56246	0	46.2278	7.39279	0	0	0	0	0	0	0	0	0	0.65837	0	0	0	0
miR-92b-5p	3.46481	5.5363	8.4632	4.84588	0	0	59.8767	0	0	0	0	18.1487	13.0275	5.05518	7.77626	9.12492	15.1655	46.2278	11.0892	14.2908	0	0	0	0	13.6439	6.589	39.127	79.9739	12.1799	82.5244	0	42.1905	3.88802
miR-934-5p	3.46481	5.5363	0	0	0	0	0	0	0	0	0	0	0	0	0	0	0	0	0	0	0	0	0	0	0	0	0	0	0	0	10.6197	0	0
miR-935-3p	3.46481	16.6089	5.64213	4.84588	0	0	0	0	0	18.7579	49.2878	0	32.5688	0	11.6644	9.12492	19.4985	92.4556	14.7856	14.2908	11.5835	0	27.5459	0	0	6.589	0	0	2.3043	2.75081	74.3376	379.715	7.77605
miR-96-3p	3.46481	5.5363	0	4.84588	0	23.6463	0	0	0	0	0	0	0	0	3.88813	0	2.1665	0	3.69639	0	0	0	0	0	0	0	0	53.3159	1.31674	35.7606	0	0	3.88802
miR-96-5p	3.46481	5.5363	0	0	0	0	0	184.298	0	0	0	0	13.0275	0	0	0	4.33299	0	0	0	0	0	0	0	0	18.1198	0	0	1.31674	38.5114	31.859	42.1905	0
let-7a-1-3p	0	5.5363	0	0	0	0	0	0	72.5795	0	0	0	0	0	0	0	0	0	3.69639	14.2908	0	0	0	0	0	0	0	0	0	0	0	0	0
let-7a-2-3p	0	5.5363	0	0	0	0	0	0	0	0	0	12.0991	0	0	3.88813	0	2.1665	0	0	14.2908	0	0	0	0	0	0	0	6.66449	0.65837	5.50162	0	0	0
miR-100-3p	0	0	0	0	0	0	0	0	0	0	0	0	0	0	0	0	6.49949	0	3.69639	0	0	0	0	0	0	1.64725	4.34745	0	0.987555	0	0	0	7.77605
miR-103-1-5p	0	5.5363	2.82107	29.0753	0	23.6463	0	0	0	0	0	12.0991	0	5.05518	0	0	6.49949	0	3.69639	28.5816	11.5835	0	13.773	0	40.9316	26.356	34.7796	19.9935	16.4593	22.0065	74.3376	0	7.77605
miR-103-2-5p	0	0	33.8528	24.2294	0	118.231	59.8767	0	72.5795	0	49.2878	60.4957	0	0	0	36.4997	41.1634	46.2278	44.3567	14.2908	69.5008	50.2437	123.957	0	95.5071	118.602	60.8643	73.3094	61.5576	101.78	106.197	126.572	128.305
miR-1179-3p	0	0	0	0	0	0	0	0	0	0	0	0	0	0	0	0	0	0	0	14.2908	0	0	0	0	0	0	0	0	0.329185	0	0	0	0
miR-1179-5p	0	0	2.82107	0	0	0	0	0	0	0	0	0	0	0	0	0	2.1665	0	3.69639	0	0	0	0	0	0	0	8.6949	0	1.64593	2.75081	0	0	0
miR-1183-3p	0	0	0	0	0	0	0	184.298	0	0	0	0	0	0	0	0	0	0	0	0	0	0	0	0	0	0	0	0	0	0	0	0	0
miR-1185-1-3p	0	0	0	0	0	47.2925	0	0	0	0	0	0	6.51377	0	0	0	0	0	0	0	11.5835	0	0	0	0	4.94175	0	0	1.31674	0	0	0	0
miR-1185-2-3p	0	0	0	0	0	0	0	0	0	18.7579	0	0	0	0	0	4.56246	0	0	0	0	0	0	0	0	0	0	4.34745	0	0	0	0	0	0
miR-1204-5p	0	0	0	0	0	0	0	0	0	0	0	0	0	0	0	0	0	0	0	0	0	0	0	0	0	0	0	0	0.329185	0	0	0	0
miR-122-3p	0	0	2.82107	0	0	0	0	0	0	0	49.2878	42.347	130.275	25.2759	0	9.12492	15.1655	0	44.3567	57.1633	23.1669	0	41.3189	0	0	9.88351	0	0	0.987555	19.2557	0	0	23.3281
miR-1224-3p	0	0	0	0	0	0	0	0	0	0	0	0	0	0	0	0	0	0	0	0	0	0	0	0	0	0	0	0	0	2.75081	0	0	0
miR-1224-5p	0	0	0	0	0	0	0	0	0	0	0	0	0	0	0	0	0	0	0	0	0	0	0	0	0	0	0	0	0	8.25244	0	42.1905	0
miR-1226-5p	0	0	0	0	0	23.6463	0	0	0	0	0	0	0	0	0	0	0	0	3.69639	0	0	0	0	0	0	0	0	6.66449	0	0	0	0	0
miR-1228-5p	0	0	0	0	0	0	0	0	0	0	0	6.04957	6.51377	10.1104	0	0	2.1665	0	3.69639	0	0	0	0	0	0	3.2945	0	0	0	0	0	0	0
miR-1229-3p	0	5.5363	0	0	0	0	0	0	0	18.7579	0	6.04957	6.51377	0	0	4.56246	2.1665	0	7.39279	0	0	0	0	0	0	3.2945	8.6949	0	1.97511	13.7541	0	0	7.77605
miR-1229-5p	0	0	0	0	0	0	0	0	0	0	0	0	0	0	3.88813	0	0	0	0	0	0	0	0	0	0	0	0	0	0	0	0	0	0
miR-1237-3p	0	0	0	0	0	0	0	0	0	0	0	0	0	0	3.88813	0	0	0	0	0	0	0	0	0	0	0	0	0	0.329185	0	0	0	0
miR-124-1-3p	0	5.5363	0	0	0	0	0	0	0	0	0	0	0	0	0	0	0	0	0	0	0	0	0	0	0	0	0	0	0	0	0	0	0
miR-1249-5p	0	0	0	0	0	0	0	0	0	0	0	0	0	0	0	0	0	0	0	0	0	0	0	0	0	0	0	6.66449	0.329185	0	0	0	0
miR-1250-5p	0	0	0	4.84588	0	0	0	0	0	0	0	0	0	0	0	4.56246	0	0	0	0	0	0	0	0	0	0	0	0	0.329185	0	0	0	0
miR-1251-3p	0	0	0	0	0	0	0	0	0	0	0	0	0	0	0	0	0	0	0	0	11.5835	0	0	0	0	0	0	0	0	0	0	0	0
miR-1255a-3p	0	0	0	0	0	0	0	0	0	0	0	0	0	0	0	0	0	0	0	0	0	0	0	0	0	0	0	0	0.329185	8.25244	0	0	0
miR-1255a-5p	0	0	5.64213	0	0	0	0	0	0	0	0	0	0	0	0	0	4.33299	0	0	0	0	0	0	0	0	0	0	0	1.31674	0	0	0	0
miR-1256-3p	0	0	0	0	0	0	0	0	0	0	0	0	0	0	0	0	0	0	0	0	0	0	0	0	0	0	0	0	0	0	0	0	3.88802
miR-125b-1-3p	0	5.5363	8.4632	0	0	23.6463	0	0	0	0	49.2878	0	6.51377	10.1104	3.88813	0	8.66598	0	7.39279	0	0	0	0	0	0	0	0	0	0.987555	5.50162	53.0983	84.3811	7.77605
miR-1-2-5p	0	0	0	0	0	0	0	0	0	0	0	0	0	0	0	0	0	0	0	0	0	0	0	0	0	1.64725	0	0	0	0	0	0	3.88802
miR-1263-3p	0	0	0	0	0	0	0	0	0	0	0	0	0	0	3.88813	0	0	0	0	0	0	0	0	0	0	0	0	0	0	0	0	0	0
miR-1263-5p	0	5.5363	0	0	0	0	0	0	0	0	0	0	0	0	0	0	0	0	0	0	0	0	0	0	0	0	0	0	0	0	0	0	11.6641
miR-1265-5p	0	0	0	0	0	0	0	0	0	0	0	0	0	0	0	0	0	0	0	0	0	0	0	0	0	0	4.34745	0	0	0	0	42.1905	0
miR-1266-3p	0	0	0	0	0	0	0	0	0	0	0	0	0	0	0	0	0	0	0	0	0	0	0	0	0	1.64725	0	13.329	0	0	0	0	0
miR-1266-5p	0	0	0	0	0	0	0	0	0	0	0	0	0	0	0	0	0	0	3.69639	0	0	0	0	0	0	0	0	0	0.329185	0	0	0	0
miR-1269-3p	0	0	31.0317	53.3046	0	0	0	0	0	0	0	0	0	0	178.854	0	225.315	0	218.087	0	0	0	0	0	0	37.8868	365.186	0	83.613	2.75081	0	0	0
miR-1269-5p	0	0	0	0	0	0	0	0	0	0	0	0	32.5688	0	11.6644	0	8.66598	0	22.1784	0	0	0	0	0	0	1.64725	0	0	0	0	0	0	23.3281
miR-1272-5p	0	0	0	0	0	0	0	0	0	0	0	0	0	0	0	0	0	0	0	0	0	0	0	0	0	0	0	0	0.329185	0	0	0	0
miR-1273-3p	0	0	0	0	0	0	0	0	0	0	0	0	0	5.05518	0	0	0	0	0	0	0	0	0	0	0	0	0	0	0	0	0	0	0
miR-1274b-5p	0	0	2.82107	0	0	0	0	0	0	0	0	12.0991	6.51377	0	0	0	2.1665	0	0	57.1633	0	0	13.773	0	13.6439	0	4.34745	0	0	2.75081	0	0	0
miR-1277-3p	0	0	0	0	0	0	0	0	0	0	0	0	0	0	0	0	0	0	0	0	0	0	0	0	0	4.94175	8.6949	0	0.987555	0	0	0	7.77605
miR-1278-3p	0	0	0	0	0	0	0	0	0	0	0	0	0	0	0	0	2.1665	0	0	0	0	0	0	0	0	0	4.34745	0	0	0	0	0	0
miR-1278-5p	0	0	0	0	0	0	0	0	0	0	0	0	0	0	3.88813	0	0	0	0	0	0	0	0	0	0	0	0	0	0	0	0	0	0
miR-1280-5p	0	0	2.82107	4.84588	0	0	0	0	0	0	0	0	0	0	0	0	2.1665	0	0	0	0	0	0	0	0	0	0	0	0.987555	0	0	0	0
miR-128-1-5p	0	0	8.4632	0	0	0	0	0	0	18.7579	0	0	0	0	0	4.56246	0	0	3.69639	0	11.5835	0	0	0	0	0	0	6.66449	0.65837	0	0	0	0
miR-128-2-5p	0	0	0	0	0	0	0	0	0	0	0	0	0	0	0	0	0	0	0	0	11.5835	0	0	0	0	0	0	0	0.65837	0	0	0	0
miR-1284-3p	0	0	0	0	0	0	0	0	0	0	0	0	0	0	0	0	0	0	0	0	0	50.2437	0	0	0	0	0	0	0	0	0	0	0
miR-1285-1-3p	0	0	0	0	0	0	0	0	0	0	0	0	0	0	0	0	0	0	0	0	0	0	0	0	0	1.64725	0	0	0.329185	2.75081	0	0	0
miR-1287-3p	0	0	0	4.84588	0	0	0	0	0	0	0	0	0	0	0	0	2.1665	0	0	0	0	0	0	0	0	0	0	0	0.329185	2.75081	0	0	0
miR-1292-3p	0	0	0	0	0	0	0	0	0	0	0	0	0	0	3.88813	0	0	0	0	0	0	0	0	0	0	0	0	0	0	0	0	0	0
miR-1293-3p	0	5.5363	0	0	0	0	0	0	0	0	0	0	13.0275	0	0	0	2.1665	0	0	0	0	0	0	0	0	0	0	0	0.329185	0	0	0	0
miR-1293-5p	0	0	0	0	0	0	0	0	0	0	0	0	6.51377	0	0	0	0	0	0	0	0	0	0	0	0	0	0	0	0	0	0	0	0
miR-1294-3p	0	0	5.64213	4.84588	0	0	0	0	0	0	0	0	0	0	0	0	0	0	3.69639	14.2908	0	0	0	0	0	1.64725	8.6949	0	0.329185	2.75081	0	0	0
miR-1294-5p	0	0	0	0	0	0	0	0	0	0	0	0	0	0	0	0	0	0	3.69639	0	0	0	0	0	0	1.64725	0	0	0	0	0	0	0
miR-1295-3p	0	0	0	0	0	0	0	0	0	0	0	6.04957	6.51377	10.1104	7.77626	0	6.49949	0	0	14.2908	0	0	0	0	0	0	0	0	0.65837	0	0	0	0
miR-1301-5p	0	0	2.82107	0	0	0	0	0	0	0	0	0	6.51377	0	3.88813	0	0	0	0	0	0	0	0	0	0	3.2945	0	0	0.329185	0	0	0	0
miR-1302-3-5p	0	0	0	4.84588	0	0	0	0	0	0	0	0	0	0	0	0	0	0	0	0	0	0	0	0	0	0	0	0	0.65837	0	0	0	0
miR-1303-5p	0	0	0	0	0	0	0	0	0	0	0	0	0	0	3.88813	0	0	0	0	0	0	0	0	0	0	0	0	0	0	0	0	0	3.88802
miR-1304-3p	0	0	2.82107	0	0	0	0	0	0	0	0	0	0	0	0	4.56246	0	0	7.39279	0	0	0	0	0	0	0	0	0	0	2.75081	0	0	0
miR-1304-5p	0	0	0	0	0	0	0	0	0	0	0	0	0	0	0	0	10.8325	0	7.39279	0	0	0	0	0	0	1.64725	0	6.66449	0	5.50162	0	0	3.88802
miR-1305-3p	0	0	0	0	0	0	0	0	0	0	0	0	0	0	3.88813	0	0	0	0	0	0	0	0	0	0	0	0	0	0	0	0	0	0
miR-1305-5p	0	0	0	0	0	0	0	0	0	0	0	0	0	0	0	0	0	0	0	0	0	0	0	0	0	0	0	0	0	2.75081	0	0	0
miR-1306-3p	0	0	5.64213	4.84588	0	0	0	0	0	18.7579	0	0	0	0	0	0	0	0	0	0	0	0	0	145.307	0	0	0	0	0	0	0	0	0
miR-133a-2-5p	0	0	0	0	0	0	0	0	0	0	0	0	0	0	0	0	0	0	0	0	0	0	0	0	0	0	0	0	0	0	0	0	0
miR-133b-3p	0	0	0	0	0	0	0	0	0	0	0	0	6.51377	0	0	0	2.1665	0	0	0	0	0	0	0	0	0	0	0	0	0	0	0	3.88802
miR-134-3p	0	0	2.82107	4.84588	0	23.6463	0	0	0	0	0	24.1983	0	0	0	4.56246	15.1655	46.2278	7.39279	14.2908	0	0	0	0	0	0	0	0	0.329185	0	0	0	0
miR-135a-1-5p	0	0	0	0	0	0	0	0	0	0	0	0	0	0	0	0	0	0	0	0	0	0	0	0	0	1.64725	0	0	0	0	0	0	3.88802
miR-135a-2-5p	0	0	0	0	0	0	0	0	0	0	0	0	0	0	0	0	0	0	0	0	0	0	0	0	0	0	0	0	0.329185	0	0	0	0
miR-135b-5p	0	77.5082	2.82107	33.9211	0	165.524	0	0	0	0	0	0	84.679	10.1104	81.6507	4.56246	12.999	0	14.7856	0	0	0	0	0	0	3.2945	78.2541	6.66449	11.1923	19.2557	10.6197	0	27.2162
miR-138-2-3p	0	11.0726	0	0	0	0	0	0	0	0	0	0	0	0	0	0	0	0	0	0	0	0	0	0	0	0	0	0	0	0	0	0	0
miR-146a-3p	0	0	0	0	0	23.6463	0	0	0	0	0	6.04957	0	25.2759	7.77626	0	0	0	0	0	0	0	0	0	0	4.94175	21.7372	0	4.93778	2.75081	0	0	0
miR-146b-3p	0	0	2.82107	0	0	0	0	0	0	0	0	0	0	0	3.88813	13.6874	2.1665	0	18.482	14.2908	0	0	0	0	0	3.2945	4.34745	0	0.329185	0	0	0	0
miR-1471-5p	0	0	0	0	0	0	0	0	0	0	0	0	0	0	0	0	0	0	0	0	0	0	0	0	0	0	0	0	0.329185	0	0	0	0
miR-147b-5p	0	0	0	0	0	0	0	0	0	0	0	0	0	5.05518	0	0	0	0	0	0	0	0	0	0	0	3.2945	0	6.66449	0	0	0	0	3.88802
miR-149-3p	0	0	0	0	0	0	0	0	0	0	0	0	0	0	0	0	0	0	0	0	0	0	0	0	0	0	0	6.66449	0	0	0	0	0
miR-153-2-5p	0	0	0	0	0	0	0	0	0	0	0	0	0	0	0	0	2.1665	0	0	0	0	0	0	0	0	1.64725	0	0	0.329185	0	0	0	0
miR-1537-3p	0	5.5363	0	0	0	0	0	0	0	0	0	0	0	0	0	0	0	0	0	0	0	0	0	0	0	1.64725	4.34745	0	2.96267	5.50162	0	0	3.88802
miR-1538-3p	0	0	0	0	0	0	0	0	0	0	0	0	0	0	0	4.56246	0	0	0	0	0	0	0	0	0	0	0	0	0	0	0	0	0
miR-1538-5p	0	0	0	0	0	0	0	0	0	0	0	6.04957	0	0	0	0	0	0	0	0	0	0	0	0	0	0	0	0	0.329185	0	0	0	0
miR-155-3p	0	5.5363	0	0	0	23.6463	0	0	0	0	0	0	0	10.1104	11.6644	0	10.8325	0	7.39279	0	0	50.2437	0	0	0	0	0	0	0	5.50162	0	0	0
miR-16-1-3p	0	0	0	0	0	23.6463	0	0	0	0	0	0	0	0	0	0	0	0	0	0	0	0	0	0	0	1.64725	0	13.329	1.31674	2.75081	0	42.1905	0
miR-181a-1-5p	0	0	0	0	0	0	0	0	0	0	0	0	0	5.05518	0	9.12492	2.1665	0	3.69639	0	0	0	0	0	0	1.64725	0	0	0.65837	0	0	0	0
miR-181a-2-5p	0	0	0	0	0	0	0	0	0	0	0	0	0	0	0	0	0	0	0	0	0	0	0	0	0	0	0	6.66449	0	0	0	0	0
miR-181d-3p	0	0	0	0	0	0	0	0	0	0	0	0	0	0	0	0	0	0	0	0	0	0	0	0	0	0	0	6.66449	0	0	0	0	0
miR-185-3p	0	0	0	0	0	0	0	0	0	0	0	0	0	0	0	0	0	0	0	0	0	0	0	0	0	0	4.34745	0	0.329185	0	10.6197	0	0
miR-187-3p	0	0	2.82107	4.84588	0	0	0	0	0	37.5157	0	0	0	0	0	0	8.66598	0	3.69639	0	0	0	0	0	0	0	0	0	0.987555	0	0	0	0
miR-18a-3p	0	0	2.82107	14.5376	0	47.2925	0	0	0	0	0	12.0991	45.5964	35.3862	3.88813	13.6874	8.66598	0	44.3567	57.1633	0	0	41.3189	145.307	81.8632	32.945	43.4745	39.9869	10.8631	137.541	10.6197	42.1905	50.5443
miR-1908-5p	0	0	0	4.84588	0	0	0	0	0	0	0	0	0	0	0	4.56246	0	0	0	0	0	0	0	0	0	0	0	13.329	0.65837	2.75081	0	0	0
miR-1909-5p	0	0	0	0	0	0	0	0	0	0	0	0	0	0	0	0	0	0	0	0	0	0	0	0	0	1.64725	4.34745	0	0	0	0	0	0
miR-190b-5p	0	0	0	4.84588	0	0	0	0	0	0	0	6.04957	13.0275	0	0	0	0	0	11.0892	0	0	0	0	0	0	0	8.6949	0	0	0	0	0	3.88802
miR-1910-3p	0	0	0	0	0	0	0	0	0	0	0	0	0	0	0	0	0	0	0	0	0	0	0	0	0	0	0	0	0	0	10.6197	0	0
miR-1910-5p	0	0	0	0	0	0	0	0	0	0	0	0	0	0	0	0	2.1665	0	0	0	0	0	0	0	0	1.64725	0	6.66449	0	0	0	0	0
miR-1912-3p	0	0	0	0	0	0	0	0	0	0	0	0	0	0	0	0	0	0	0	0	0	0	0	0	0	0	0	0	0	0	0	0	0
miR-1913-3p	0	0	0	0	0	0	0	0	0	0	0	6.04957	0	5.05518	3.88813	0	0	0	0	0	0	0	0	0	0	0	0	0	0	0	0	0	0
miR-1913-5p	0	5.5363	0	0	0	0	0	0	0	0	0	0	0	0	0	0	2.1665	0	0	0	0	0	0	0	0	0	0	0	0	0	0	0	0
miR-1914-3p	0	0	0	0	0	0	0	0	0	0	0	0	0	0	0	0	0	0	0	0	0	0	0	0	0	3.2945	17.3898	26.658	1.97511	0	0	0	0
miR-1914-5p	0	0	0	0	0	0	0	0	0	0	0	0	0	0	0	0	0	0	3.69639	0	0	0	0	0	0	4.94175	26.0847	66.6449	8.55881	27.5081	10.6197	42.1905	3.88802
miR-1915-5p	0	0	0	0	0	0	0	0	0	0	0	0	0	0	0	0	0	0	0	0	11.5835	0	0	0	0	0	0	0	0.329185	0	0	0	0
miR-197-5p	0	0	0	0	0	0	0	0	0	0	0	0	0	0	0	0	0	0	0	0	0	0	0	0	0	0	0	13.329	0.65837	0	0	0	0
miR-1976-3p	0	0	0	4.84588	0	0	0	0	0	0	0	0	0	0	0	4.56246	0	0	0	0	0	0	0	0	27.2877	0	0	0	0.65837	0	21.2393	0	0
miR-1976-5p	0	0	0	0	0	0	0	0	0	0	0	0	0	0	0	0	0	0	0	0	0	0	0	0	0	3.2945	0	0	0.329185	0	0	0	0
miR-199a-1-5p	0	0	0	4.84588	0	0	0	0	0	0	0	0	0	0	0	0	0	0	0	0	0	0	0	0	0	3.2945	0	0	0.65837	0	0	0	11.6641
miR-199a-2-5p	0	0	0	0	0	0	0	0	0	0	0	0	0	0	0	0	0	0	0	0	0	0	0	0	0	1.64725	4.34745	0	0	0	0	0	0
miR-19a-5p	0	0	0	0	0	0	0	0	0	0	0	0	0	0	3.88813	0	0	0	0	0	0	0	27.5459	0	0	1.64725	0	0	1.31674	0	0	42.1905	11.6641
miR-19b-2-5p	0	11.0726	0	0	0	0	0	0	0	0	0	0	0	0	0	0	0	0	0	0	0	0	0	0	0	0	0	0	0.329185	2.75081	0	0	7.77605
miR-202-3p	0	0	0	0	0	0	0	0	0	0	0	6.04957	0	0	0	0	0	0	0	0	0	0	0	0	0	0	0	0	0	0	0	0	0
miR-202-5p	0	0	0	0	0	0	0	0	0	0	0	6.04957	19.5413	0	11.6644	0	0	0	0	0	0	0	0	0	0	3.2945	0	0	0.329185	0	0	0	0
miR-208b-3p	0	0	0	0	0	0	0	0	0	0	0	0	0	0	0	0	0	0	0	0	0	0	0	0	0	0	0	6.66449	0.329185	2.75081	0	0	0
miR-212-5p	0	0	0	0	0	0	0	0	0	0	0	0	0	0	0	4.56246	0	0	0	0	0	0	0	0	0	0	8.6949	0	1.31674	5.50162	0	0	0
miR-216a-5p	0	0	2.82107	0	0	0	0	0	0	0	0	0	6.51377	0	0	0	0	0	3.69639	14.2908	0	0	0	0	0	0	0	0	0	0	0	0	0
miR-216b-3p	0	0	2.82107	9.69175	0	0	0	0	0	0	0	0	0	0	0	0	0	0	0	0	0	0	0	0	0	0	0	0	0	0	0	0	0
miR-218-1-5p	0	0	0	0	0	0	0	0	0	0	0	0	0	0	11.6644	0	0	0	3.69639	0	0	0	0	0	0	1.64725	0	0	0	0	0	0	0
miR-218-2-5p	0	0	0	0	0	0	0	0	0	0	0	0	0	0	0	0	0	0	0	0	0	0	0	0	0	0	0	0	0.329185	0	0	0	0
miR-26a-1-3p	0	11.0726	8.4632	0	0	23.6463	0	0	0	0	0	6.04957	0	5.05518	0	4.56246	0	0	3.69639	0	0	0	0	0	0	0	0	0	0	2.75081	10.6197	0	3.88802
miR-299-3p	0	5.5363	0	0	0	0	0	0	0	0	0	0	0	0	11.6644	0	0	0	0	14.2908	11.5835	0	0	0	0	0	4.34745	0	0	5.50162	0	0	11.6641
miR-302a-3p	0	0	5.64213	0	0	0	59.8767	0	0	0	0	0	0	0	0	0	0	0	0	0	0	0	0	0	0	0	0	0	0	0	0	0	0
miR-302d-3p	0	0	5.64213	9.69175	0	0	0	0	0	0	0	0	0	0	0	0	0	0	0	0	0	0	0	0	0	0	0	0	0.329185	0	0	0	0
miR-30c-1-3p	0	0	5.64213	4.84588	0	0	0	0	0	0	0	0	0	0	0	4.56246	2.1665	0	0	0	0	0	0	0	0	0	0	6.66449	2.3043	0	53.0983	0	15.5521
miR-30c-1-5p	0	5.5363	0	4.84588	0	0	0	0	0	0	0	0	0	0	0	0	0	0	0	0	0	0	0	0	0	0	0	0	0	2.75081	0	0	0
miR-30c-2-5p	0	0	0	4.84588	0	0	0	0	0	0	0	0	6.51377	5.05518	0	0	0	0	3.69639	0	0	0	27.5459	0	0	1.64725	0	0	0	0	0	0	0
miR-328-5p	0	0	0	0	0	0	0	0	0	0	0	0	0	0	0	0	0	0	0	0	11.5835	0	0	0	0	0	0	0	0	0	0	0	0
miR-330-5p	0	0	0	0	0	0	0	0	0	0	0	6.04957	6.51377	5.05518	0	0	0	0	3.69639	0	0	50.2437	0	0	0	0	0	0	0	0	0	0	0
miR-33b-3p	0	0	5.64213	0	0	0	0	0	0	0	0	0	0	0	7.77626	0	0	0	0	0	0	0	0	0	0	0	4.34745	0	0.987555	8.25244	0	0	7.77605
miR-340-5p	0	0	11.2843	9.69175	0	0	59.8767	184.298	0	56.2736	49.2878	72.5948	6.51377	0	3.88813	63.8744	38.9969	46.2278	36.9639	71.4541	185.335	0	82.6378	290.613	40.9316	26.356	43.4745	0	1.97511	19.2557	0	0	27.2162
miR-34c-3p	0	0	0	0	0	0	0	0	0	0	0	0	6.51377	15.1655	7.77626	0	8.66598	0	0	14.2908	0	50.2437	13.773	0	0	3.2945	8.6949	0	2.3043	0	0	0	0
miR-363-5p	0	0	5.64213	0	0	23.6463	0	0	145.159	0	0	0	6.51377	0	0	0	0	0	0	0	0	0	0	0	0	0	0	0	0.329185	0	0	0	0
miR-365-1-5p	0	0	8.4632	0	0	0	0	184.298	0	0	0	0	6.51377	0	0	0	4.33299	0	0	14.2908	0	0	0	0	0	0	4.34745	413.198	0.65837	30.2589	10.6197	42.1905	7.77605
miR-365-2-3p	0	0	0	0	0	0	0	0	72.5795	0	0	0	0	0	0	0	0	0	0	0	0	0	0	0	0	0	0	0	0	0	0	0	0
miR-365-2-5p	0	0	0	0	0	0	0	0	0	0	49.2878	0	0	0	0	0	0	0	0	0	0	0	0	0	0	0	13.0423	26.658	3.62104	30.2589	10.6197	0	0
miR-370-5p	0	0	0	0	0	0	0	0	0	0	0	0	0	0	0	0	0	0	0	0	0	0	0	0	0	0	0	0	0.65837	0	0	0	0
miR-371-5p	0	0	2.82107	0	0	0	0	0	0	0	0	0	0	0	0	0	0	0	0	0	0	0	0	0	0	0	0	0	0	0	0	0	0
miR-372-3p	0	5.5363	0	0	0	0	0	0	0	0	0	0	0	0	0	0	0	0	0	0	0	0	0	0	0	0	0	0	0	0	0	0	0
miR-373-3p	0	0	5.64213	0	0	0	0	0	0	0	0	0	0	0	0	0	0	0	0	0	0	0	0	0	0	1.64725	0	0	0	0	0	0	0
miR-374a-3p	0	5.5363	0	0	0	0	0	0	0	0	0	6.04957	0	0	3.88813	0	0	0	3.69639	0	0	0	0	0	0	3.2945	4.34745	0	1.31674	0	0	0	7.77605
miR-374b-3p	0	0	2.82107	0	0	0	0	0	0	0	0	6.04957	0	15.1655	7.77626	4.56246	6.49949	0	0	0	23.1669	0	27.5459	0	0	4.94175	0	0	1.31674	2.75081	0	0	3.88802
miR-377-3p	0	0	0	0	0	0	0	0	0	18.7579	0	0	0	5.05518	0	0	0	0	0	0	0	0	0	0	0	11.5308	0	0	0	0	0	0	15.5521
miR-377-5p	0	5.5363	2.82107	0	0	0	0	0	0	0	0	0	6.51377	0	0	4.56246	0	0	0	0	0	0	0	0	0	0	0	0	0.329185	0	0	0	0
miR-378-3p	0	0	2.82107	0	0	0	0	184.298	0	18.7579	0	0	0	0	0	0	0	0	0	0	0	0	0	0	0	0	0	0	0	0	0	0	0
miR-379-3p	0	5.5363	0	4.84588	0	0	0	0	0	0	0	0	0	5.05518	3.88813	0	2.1665	0	0	0	0	0	0	0	0	0	0	0	0.329185	5.50162	0	0	0
miR-380-3p	0	0	0	0	0	0	0	0	0	0	0	0	0	0	0	0	0	0	0	0	0	0	0	0	0	1.64725	0	0	0.329185	0	0	0	0
miR-410-3p	0	0	2.82107	0	0	0	0	0	0	0	0	0	0	0	0	0	0	0	0	0	0	0	0	0	0	1.64725	0	0	0	0	0	0	7.77605
miR-411-3p	0	0	0	0	0	0	0	0	0	0	0	0	6.51377	20.2207	3.88813	4.56246	4.33299	0	7.39279	28.5816	0	0	0	0	27.2877	0	4.34745	0	0	0	0	0	7.77605
miR-412-3p	0	0	0	0	0	0	0	0	0	0	0	0	0	5.05518	0	0	0	0	0	0	0	0	0	0	0	0	0	0	0	0	0	0	0
miR-412-5p	0	11.0726	0	4.84588	0	0	0	0	0	0	0	0	0	10.1104	3.88813	0	0	0	0	0	0	0	0	0	0	1.64725	0	0	0.329185	0	0	0	0
miR-421-5p	0	0	2.82107	0	0	0	0	0	0	0	0	0	0	0	0	0	4.33299	0	0	0	0	0	0	0	0	1.64725	0	0	2.3043	0	0	0	0
miR-422a-5p	0	0	0	0	0	0	0	0	0	0	0	12.0991	0	0	0	0	0	0	0	0	0	0	0	0	0	0	0	0	0	0	0	0	0
miR-429-5p	0	5.5363	0	0	0	0	0	0	0	0	0	0	0	0	0	0	2.1665	0	0	0	0	0	0	0	0	0	0	0	0	0	0	0	0
miR-431-3p	0	0	0	0	0	0	0	0	0	0	0	0	0	0	0	0	0	0	0	0	0	0	0	0	0	0	0	0	0	0	0	42.1905	0
miR-432-3p	0	0	0	0	0	0	0	0	0	0	0	0	0	0	0	0	0	0	0	0	0	0	0	0	0	0	0	0	0	0	0	0	0
miR-449b-3p	0	0	0	4.84588	0	0	0	0	0	0	49.2878	0	0	5.05518	0	0	0	0	0	0	0	0	0	0	0	0	0	6.66449	0	8.25244	0	0	0
miR-449b-5p	0	0	0	0	0	0	0	0	0	0	0	0	0	0	0	0	2.1665	0	0	0	0	0	0	0	0	1.64725	0	0	0.329185	0	0	0	0
miR-450a-1-3p	0	0	0	0	0	0	0	0	0	0	0	0	6.51377	5.05518	0	0	0	0	0	0	0	0	0	0	0	0	0	0	0.65837	2.75081	0	0	3.88802
miR-450b-3p	0	0	0	0	0	0	0	0	0	0	0	0	0	0	0	0	2.1665	0	0	0	0	0	0	0	0	1.64725	0	0	0.329185	0	0	0	0
miR-452-3p	0	5.5363	2.82107	0	0	23.6463	0	0	0	18.7579	0	42.347	26.0551	20.2207	7.77626	18.2498	32.4974	0	18.482	0	23.1669	0	27.5459	0	13.6439	0	4.34745	0	1.31674	2.75081	0	0	0
miR-483-3p	0	0	0	4.84588	0	23.6463	0	0	0	0	0	0	0	0	0	0	0	46.2278	0	0	0	0	0	0	0	0	0	0	0.329185	0	0	0	0
miR-486-3p	0	0	0	0	0	0	0	0	0	0	0	0	0	0	3.88813	0	0	0	0	0	0	0	0	0	0	0	0	0	0.65837	0	0	0	0
miR-486-5p	0	5.5363	2.82107	29.0753	0	0	0	0	0	0	0	6.04957	6.51377	5.05518	3.88813	4.56246	6.49949	0	3.69639	0	0	0	0	0	0	0	8.6949	0	3.62104	2.75081	0	0	0
miR-487a-3p	0	5.5363	0	0	0	23.6463	0	0	0	56.2736	0	0	6.51377	10.1104	0	4.56246	0	0	11.0892	0	0	0	0	0	0	4.94175	4.34745	0	2.3043	0	10.6197	0	11.6641
miR-487a-5p	0	5.5363	0	4.84588	0	0	0	0	0	0	0	0	0	0	0	0	0	0	0	0	0	0	0	0	0	0	0	0	0	0	0	0	0
miR-488-5p	0	0	0	4.84588	0	0	0	0	0	0	0	0	0	0	0	0	0	0	0	0	0	0	0	0	0	0	0	0	0	0	0	0	0
miR-491-3p	0	11.0726	0	0	0	0	0	0	0	0	0	0	0	5.05518	0	0	0	0	0	0	0	0	13.773	0	0	3.2945	0	0	0.329185	0	0	0	0
miR-493-3p	0	0	0	0	0	0	0	0	0	0	0	0	0	0	0	0	0	0	0	0	0	0	0	0	0	0	4.34745	0	0.65837	0	0	0	0
miR-495-5p	0	0	0	4.84588	0	0	0	0	0	0	0	0	0	0	0	0	0	0	0	0	0	0	0	0	0	0	0	0	0.329185	0	0	0	0
miR-496-3p	0	5.5363	0	0	0	0	0	0	0	0	0	6.04957	0	0	3.88813	0	0	0	3.69639	0	0	0	0	0	0	1.64725	0	0	0.329185	0	0	0	0
miR-498-5p	0	0	0	0	0	0	0	0	0	0	0	0	0	0	0	0	0	0	0	0	0	0	0	0	0	0	0	0	0	2.75081	0	0	0
miR-499-3p	0	0	0	0	0	0	0	0	0	0	0	0	0	0	0	0	0	0	0	0	0	0	0	0	0	1.64725	0	0	0.987555	0	0	0	3.88802
miR-499-5p	0	0	0	0	0	0	59.8767	0	0	0	0	12.0991	0	20.2207	7.77626	0	4.33299	0	7.39279	14.2908	0	0	82.6378	0	0	0	8.6949	0	0	0	0	0	0
miR-504-3p	0	0	0	0	0	0	0	0	72.5795	0	0	0	0	0	0	0	0	0	0	0	0	0	0	0	0	0	0	0	0.65837	0	10.6197	0	0
miR-513b-5p	0	11.0726	0	0	0	0	0	0	0	0	0	0	0	0	0	0	0	0	0	0	0	0	0	0	0	0	0	0	1.31674	0	0	0	0
miR-513c-5p	0	0	0	0	0	0	0	0	0	0	0	0	0	0	0	0	0	0	0	0	0	0	0	0	0	0	0	0	0.987555	0	0	0	0
miR-519a-1-5p	0	0	0	0	0	0	0	0	0	0	0	0	0	0	0	0	0	0	0	0	0	0	0	0	0	0	0	0	0	2.75081	0	0	0
miR-519d-3p	0	0	0	0	0	0	0	0	0	0	0	0	0	0	0	0	0	0	0	0	0	0	0	0	0	0	0	0	0	0	0	0	0
miR-520d-3p	0	0	0	0	0	0	0	0	72.5795	0	0	0	0	0	0	0	0	0	0	0	0	0	0	0	0	0	0	0	0	0	0	0	0
miR-520g-3p	0	0	0	0	0	0	0	0	0	0	0	0	0	0	0	0	0	0	0	0	11.5835	0	0	0	0	0	0	0	0	0	0	0	0
miR-522-3p	0	0	0	0	0	0	0	0	0	0	0	0	0	0	0	0	0	0	0	0	0	0	0	0	0	0	0	0	0	2.75081	0	0	0
miR-523-3p	0	0	0	0	0	0	0	0	0	0	0	0	0	0	0	0	0	0	0	0	0	0	0	0	0	0	0	0	0	0	0	0	0
miR-539-3p	0	0	0	0	0	0	0	0	0	0	0	0	0	0	0	0	0	0	0	0	0	0	0	0	0	0	0	0	0	0	0	0	7.77605
miR-541-5p	0	0	0	0	0	0	0	0	0	0	0	0	0	0	0	0	0	0	0	14.2908	0	0	0	0	0	0	0	0	0.329185	0	0	0	0
miR-543-5p	0	0	0	0	0	0	0	0	0	0	0	0	0	5.05518	0	0	0	0	0	0	0	0	0	0	0	0	0	0	0.329185	0	0	0	0
miR-545-3p	0	0	0	0	0	0	0	0	0	0	0	0	0	0	0	0	0	0	0	0	0	0	0	0	0	9.88351	8.6949	0	0.987555	2.75081	0	0	19.4401
miR-548e-3p	0	0	0	0	0	0	0	0	0	0	0	0	0	0	0	0	0	0	0	0	0	0	0	0	0	0	8.6949	0	0	2.75081	0	0	0
miR-548e-5p	0	0	0	0	0	0	0	0	0	0	0	0	0	0	0	4.56246	0	0	0	0	0	0	0	0	0	0	0	0	0	0	0	0	0
miR-548j-5p	0	0	0	0	0	0	0	0	0	0	0	0	0	0	7.77626	0	0	0	0	0	0	0	0	0	0	0	0	0	0	0	0	0	0
miR-548k-3p	0	0	0	0	0	0	0	0	0	0	0	0	0	0	0	0	0	0	0	0	0	0	0	0	0	0	0	0	0.329185	0	0	0	0
miR-548l-5p	0	0	0	0	0	0	0	0	0	0	0	6.04957	0	0	0	0	0	0	0	0	0	0	0	0	0	0	0	0	0	0	0	0	0
miR-551b-5p	0	0	8.4632	4.84588	0	0	0	0	0	0	0	0	0	0	0	13.6874	0	0	0	0	0	0	0	0	0	0	0	0	0	0	0	0	7.77605
miR-556-3p	0	0	0	0	0	0	59.8767	0	0	0	0	0	0	0	0	0	0	0	0	0	0	0	0	0	0	0	0	6.66449	0	0	0	0	0
miR-556-5p	0	0	2.82107	0	0	0	0	0	0	0	0	0	0	0	0	0	0	0	0	0	0	0	0	0	0	0	0	0	0	0	0	0	0
miR-559-5p	0	0	0	0	0	0	0	0	0	18.7579	0	0	0	0	0	0	0	0	0	0	0	0	0	0	0	0	0	0	0	0	0	0	0
miR-561-5p	0	0	0	0	0	0	0	0	72.5795	0	0	6.04957	0	0	0	0	2.1665	0	0	0	0	0	0	0	0	0	0	13.329	1.31674	24.7573	21.2393	0	7.77605
miR-564-5p	0	0	0	0	0	0	0	0	0	0	0	0	0	0	0	0	0	0	0	0	0	0	0	0	0	0	0	0	0.65837	0	0	0	0
miR-570-3p	0	5.5363	5.64213	0	0	0	0	0	0	0	0	18.1487	19.5413	0	3.88813	4.56246	2.1665	0	7.39279	0	0	0	0	0	0	13.178	4.34745	0	0.65837	8.25244	0	0	15.5521
miR-573-5p	0	0	0	0	0	0	0	0	0	0	0	0	0	0	0	0	0	0	0	0	0	0	0	0	0	0	0	0	0	2.75081	0	0	0
miR-576-5p	0	0	0	9.69175	0	0	0	0	0	0	0	0	0	10.1104	3.88813	4.56246	0	0	3.69639	0	0	0	0	0	0	3.2945	8.6949	0	0.987555	2.75081	0	0	7.77605
miR-577-3p	0	5.5363	0	0	0	0	0	0	0	0	0	0	0	0	0	0	0	0	0	0	0	0	0	0	0	0	0	0	0	0	0	0	0
miR-579-5p	0	0	0	4.84588	0	0	0	0	0	0	0	6.04957	6.51377	10.1104	3.88813	4.56246	2.1665	0	3.69639	0	0	0	0	0	0	0	4.34745	0	0.65837	0	0	0	3.88802
miR-581-5p	0	0	0	0	0	0	0	0	0	0	0	0	0	0	0	0	0	0	0	0	0	0	0	0	0	0	8.6949	0	0	0	0	0	0
miR-584-3p	0	0	0	0	0	0	0	0	0	0	0	0	0	0	0	0	0	0	0	0	0	0	0	0	0	0	0	6.66449	0.329185	0	0	0	0
miR-586-5p	0	0	0	0	0	0	0	0	0	0	0	0	0	0	0	0	0	0	0	0	0	0	0	0	0	0	0	0	0.329185	0	0	0	0
miR-588-3p	0	0	0	0	0	0	0	0	0	0	0	0	0	0	0	0	0	0	3.69639	0	0	0	0	0	0	0	0	0	0	0	0	0	0
miR-592-3p	0	0	0	0	0	0	0	0	0	0	0	0	0	5.05518	0	0	0	46.2278	25.8748	0	0	0	0	0	0	1.64725	4.34745	0	0	0	0	0	0
miR-597-3p	0	0	0	0	0	0	0	0	0	0	0	0	0	0	0	0	0	0	0	0	0	0	0	0	0	1.64725	0	0	0.329185	0	0	0	0
miR-597-5p	0	5.5363	0	0	0	0	0	0	0	0	0	6.04957	0	5.05518	11.6644	0	4.33299	0	0	0	0	0	0	0	0	21.4143	13.0423	0	0.987555	11.0032	0	0	7.77605
miR-599-3p	0	0	0	4.84588	0	0	0	0	0	0	0	0	0	0	0	0	0	0	18.482	0	0	0	0	0	0	0	0	0	0	0	0	0	34.9922
miR-599-5p	0	0	0	9.69175	0	0	0	0	0	0	0	0	0	0	0	0	0	0	3.69639	0	34.7504	150.731	0	145.307	13.6439	0	0	0	0	0	0	0	42.7683
miR-600-5p	0	0	0	0	0	0	0	0	0	0	0	0	0	0	0	0	0	0	0	0	0	0	0	0	0	1.64725	0	0	0.329185	0	0	0	0
miR-603-3p	0	5.5363	0	0	0	0	0	0	0	0	0	0	0	0	0	0	0	0	0	0	0	0	0	0	0	0	0	0	0	0	0	0	0
miR-604-3p	0	0	0	0	0	0	0	0	0	0	0	0	0	0	0	0	0	0	0	0	11.5835	0	0	0	0	0	0	0	0	0	0	0	0
miR-605-3p	0	0	0	0	0	0	0	0	0	0	0	0	0	0	0	0	0	0	0	0	0	0	0	0	0	4.94175	0	0	0	0	0	0	0
miR-611-5p	0	0	0	0	0	0	0	0	0	0	0	0	0	0	0	0	0	0	0	0	0	0	0	0	0	0	0	0	0	2.75081	0	0	0
miR-616-3p	0	0	0	0	0	0	0	0	0	0	0	0	0	0	0	0	0	0	0	0	0	0	0	0	0	1.64725	0	0	0.329185	5.50162	0	0	0
miR-618-3p	0	5.5363	16.9264	0	0	0	0	0	0	0	0	0	0	0	3.88813	0	0	0	7.39279	0	0	0	0	0	0	1.64725	0	0	0	0	0	0	0
miR-624-5p	0	5.5363	5.64213	0	0	0	0	0	72.5795	0	0	12.0991	6.51377	15.1655	11.6644	0	2.1665	92.4556	22.1784	0	23.1669	0	0	0	0	1.64725	4.34745	0	1.97511	11.0032	10.6197	0	0
miR-625-5p	0	0	0	0	0	0	0	0	0	0	0	0	0	0	0	0	0	0	0	14.2908	0	0	0	0	0	0	0	0	0	0	0	0	0
miR-627-3p	0	5.5363	0	0	0	0	0	0	0	0	0	0	0	0	0	4.56246	0	0	0	0	0	0	0	0	0	1.64725	0	0	0.987555	0	0	0	0
miR-628-3p	0	0	0	0	0	0	0	0	0	0	0	0	0	0	3.88813	0	0	0	0	0	0	0	0	0	0	1.64725	0	0	0	0	0	0	0
miR-629-3p	0	5.5363	11.2843	19.3835	0	23.6463	0	0	72.5795	56.2736	0	48.3966	19.5413	20.2207	15.5525	18.2498	43.3299	0	18.482	0	11.5835	0	27.5459	0	0	4.94175	13.0423	0	10.2047	2.75081	0	0	15.5521
miR-636-5p	0	0	0	0	0	0	0	0	0	0	0	0	6.51377	0	0	0	0	0	0	0	0	0	0	0	0	0	0	0	0	0	0	0	0
miR-641-3p	0	0	0	0	0	0	0	0	0	0	0	0	0	0	0	0	0	0	0	0	0	0	0	0	0	1.64725	0	0	0.329185	2.75081	0	0	0
miR-642-5p	0	0	0	4.84588	0	23.6463	0	0	0	0	0	6.04957	0	0	0	9.12492	41.1634	0	7.39279	0	0	0	0	0	0	0	0	0	3.29185	2.75081	10.6197	0	0
miR-643-3p	0	0	2.82107	0	0	0	0	0	0	0	0	0	0	0	0	0	0	0	11.0892	0	0	0	13.773	0	0	3.2945	0	0	0.65837	2.75081	10.6197	0	0
miR-645-3p	0	0	0	0	0	0	0	0	0	0	0	0	0	0	0	0	2.1665	0	0	0	0	0	0	0	0	0	0	0	0	0	0	0	0
miR-651-5p	0	0	0	0	0	0	0	0	0	0	0	0	0	0	0	0	0	0	0	0	0	0	0	0	0	0	0	0	0	0	0	0	0
miR-658-3p	0	0	0	0	0	0	0	0	0	0	0	0	0	0	0	0	0	0	0	0	0	0	0	0	0	0	0	0	0.65837	0	0	0	0
miR-659-5p	0	0	0	0	0	0	0	0	0	0	0	0	0	0	0	0	0	0	0	0	0	0	0	0	0	0	0	0	0.329185	0	0	0	0
miR-665-3p	0	0	0	0	0	0	0	0	0	0	0	0	0	5.05518	0	0	2.1665	0	3.69639	0	0	0	0	0	0	3.2945	0	0	14.4841	0	21.2393	0	31.1042
miR-665-5p	0	0	0	0	0	0	0	0	0	0	0	0	0	0	0	0	0	0	0	0	0	0	0	0	0	0	0	0	0.65837	0	0	0	0
miR-675-5p	0	11.0726	14.1053	0	0	0	0	0	0	0	49.2878	0	0	0	0	0	2.1665	0	3.69639	0	0	0	0	0	0	9.88351	82.6015	0	1.64593	0	10.6197	42.1905	0
miR-720-5p	0	0	0	4.84588	0	0	0	0	0	0	0	0	0	0	0	0	6.49949	0	0	0	0	0	27.5459	0	0	1.64725	0	6.66449	0.329185	0	0	0	0
miR-7-2-5p	0	0	0	0	0	0	0	0	0	0	0	0	0	0	3.88813	4.56246	0	0	0	0	0	0	0	0	0	1.64725	0	0	0	5.50162	0	0	0
miR-758-3p	0	11.0726	0	0	0	0	0	0	0	0	0	0	0	0	3.88813	0	0	0	0	14.2908	0	0	0	0	0	0	0	0	0.65837	0	0	0	3.88802
miR-758-5p	0	0	0	0	0	0	0	0	0	0	0	0	0	0	0	0	0	0	3.69639	0	0	0	0	0	0	0	0	0	0.329185	0	0	0	3.88802
miR-760-3p	0	0	0	0	0	0	0	0	0	0	0	0	0	0	0	0	2.1665	0	3.69639	0	0	0	0	0	0	3.2945	8.6949	6.66449	1.31674	2.75081	0	0	0
miR-765-3p	0	0	0	0	0	0	0	0	0	0	0	0	0	0	0	0	0	0	3.69639	0	0	0	0	0	0	0	0	0	0.65837	0	0	0	0
miR-766-5p	0	0	0	4.84588	0	0	0	0	0	0	0	0	0	0	0	0	0	0	0	0	0	0	0	0	0	0	4.34745	0	0.329185	5.50162	0	0	0
miR-767-5p	0	5.5363	0	0	0	0	0	0	0	0	0	0	0	0	0	0	0	0	0	0	0	0	0	0	0	0	0	0	0	0	0	0	0
miR-770-5p	0	5.5363	0	0	0	0	0	0	0	0	0	0	0	0	0	0	0	0	0	0	0	0	0	0	0	0	0	0	0	0	0	0	0
miR-802-5p	0	0	0	0	0	0	0	0	0	0	0	0	26.0551	0	0	0	0	0	0	0	0	0	0	0	0	3.2945	0	0	0	0	0	0	0
miR-873-3p	0	0	2.82107	0	0	0	0	0	0	0	0	12.0991	0	0	0	4.56246	0	0	0	0	0	0	0	0	0	0	0	0	0.65837	0	0	0	0
miR-873-5p	0	5.5363	28.2107	24.2294	0	0	0	0	0	18.7579	0	6.04957	0	0	3.88813	4.56246	6.49949	0	0	0	0	0	0	0	0	1.64725	4.34745	0	5.26696	0	0	0	7.77605
miR-875-5p	0	0	0	0	0	0	0	0	0	0	0	6.04957	0	0	0	0	0	0	0	0	23.1669	0	0	145.307	0	0	0	0	0	0	0	0	19.4401
miR-885-3p	0	0	0	0	0	0	0	0	0	0	0	0	6.51377	0	0	0	6.49949	0	0	14.2908	0	0	0	0	0	28.0033	0	0	0.987555	0	0	0	0
miR-885-5p	0	0	0	0	0	0	0	0	0	0	0	6.04957	0	0	0	0	0	0	0	0	0	0	13.773	0	0	4.94175	0	0	0.329185	0	0	0	0
miR-887-5p	0	0	0	0	0	0	0	0	0	0	0	0	0	0	0	0	0	0	0	0	0	0	13.773	0	0	0	0	0	0.329185	0	0	0	0
miR-890-5p	0	0	0	4.84588	0	0	0	0	0	0	0	0	6.51377	0	0	0	0	0	0	0	0	0	0	0	0	0	0	0	0	0	0	0	0
miR-891a-3p	0	0	2.82107	0	0	0	0	0	0	0	0	0	0	0	0	0	0	0	0	0	0	0	0	0	0	0	0	0	0.329185	0	0	0	0
miR-892a-3p	0	5.5363	0	0	0	0	0	0	0	0	0	0	0	0	0	0	0	0	0	0	0	0	0	0	0	0	0	0	0	0	0	0	7.77605
miR-892a-5p	0	0	0	4.84588	0	0	0	0	0	0	0	0	0	0	0	0	0	0	0	0	0	0	0	0	0	0	0	0	0	0	0	0	0
miR-892b-3p	0	0	0	0	0	0	0	0	0	0	0	0	0	0	0	0	0	0	3.69639	0	0	0	0	0	0	0	0	0	0.329185	0	0	0	0
miR-9-1-3p	0	0	0	0	0	0	0	0	0	0	0	0	0	0	0	0	0	0	0	14.2908	0	0	0	0	0	0	0	0	0	0	0	0	0
miR-922-3p	0	0	0	0	0	0	0	0	0	0	0	0	0	0	0	0	0	46.2278	0	0	0	0	0	0	13.6439	0	0	0	0	0	0	0	0
miR-92a-2-5p	0	0	0	0	0	23.6463	0	0	0	0	0	12.0991	0	0	0	0	0	0	0	0	11.5835	0	0	0	0	0	0	0	0.329185	0	0	0	0
miR-9-3-3p	0	0	0	4.84588	0	0	0	0	0	0	0	0	0	0	0	0	0	0	14.7856	0	0	0	0	0	0	0	4.34745	0	1.31674	0	0	0	0
miR-937-3p	0	0	0	0	0	0	0	0	0	0	0	0	0	0	0	4.56246	2.1665	0	0	0	0	0	0	0	0	0	0	0	1.97511	5.50162	0	0	0
miR-937-5p	0	0	0	0	0	0	0	0	0	0	0	0	0	0	0	0	0	0	0	0	0	0	0	0	0	0	0	6.66449	0	0	0	0	0
miR-938-5p	0	0	0	0	0	0	0	0	0	18.7579	0	0	0	0	0	0	0	0	0	0	0	0	0	0	0	1.64725	0	0	0	0	0	0	0
miR-939-3p	0	0	0	0	0	0	0	0	0	0	0	0	0	0	3.88813	0	0	0	0	0	0	0	0	0	0	0	0	0	0.329185	0	0	0	3.88802
miR-939-5p	0	0	2.82107	0	0	0	0	0	0	0	0	0	0	0	0	0	2.1665	0	0	0	0	0	0	0	0	0	0	0	0.329185	0	0	0	0
miR-942-5p	0	0	2.82107	0	0	0	0	0	0	18.7579	0	0	0	0	0	4.56246	2.1665	0	3.69639	28.5816	11.5835	0	0	0	0	1.64725	0	26.658	0.329185	5.50162	0	0	0
The expression level is presented as read count / million (DOC file)
