# Supplementary material for: Genome-Wide MicroRNA Expression Analysis of Clear Cell Renal Cell Carcinoma by Next Generation Deep Sequencing
Source: PLoS One. 2012 Jun 20;7(6):e38298. doi: 10.1371/journal.pone.0038298 (PMC3380046; doi:10.1371/journal.pone.0038298)
Supplement: Table S3 — Novel miRNA candidates were predicted using two independent HMMiR and microPred. These are novel miRNAs not previously reported in any species. The novel miRNA candidate with expression levels exceeding 50 read counts/million in all sequenced samples are presented (XLS file). (XLS) [file pone.0038298.s005.xls]

## Sheet: Sheet1
Table S3. Novel miRNA candidates were predicted using two independent HMMiR and microPred
provisional ID	Chr.	Strand	Start	End	miR sequence	read counts/million	precursor sequence	precursor sequence fold	%(C+G)	MFEI1	MFEI2	dG	dQ	dF	zD	NEFE	Diff	dS	dS/L	Avg_BP_Stems	(A-U)/L	(G-C)/L	(G-U)L	%(A-U)/stems	%(G-C)/stems	%(G-U)/stems	MFEI3	MFEI4	Diversity
cand_617	chr20	-	56460168	56460189	ggaccacucuaugggcaguccu	3702	UGGUACAAGGGCUGCCCAUCCCUACCCAGUGCAGGACCACUCUAUGGGCAGUCCUUGCCCCAGAA	(((..((((((((((((((......((......))........))))))))))))))..)))...	60	-0.00778	-0.155385	-0.4668	-25264.9	0.585786	0.0322	-0.482923	0.0161538	-574.9	-8.84462	6.33333	0.0923077	0.184615	0.0153846	10.5263	21.0526	1.75439	-0.116538	-1.59684	3.075
cand_595	chr20	-	4019619	4019640	gcaaaggaagacaaggggagag	892	UCCCCCUCUUCUUGCCUGGAGCCUCCCAAGCUCCAAGGCAAAGGAAGACAAGGGGAGAGGAAGA	(((((.((((((((((((((((.......))))).)))))..))))))...)))))........	57.81	-0.00832382	-0.160417	-0.4812	-51.522	0.585786	0.0399	-0.5	0.01875	-629.4	-9.83437	7	0.109375	0.203125	0.015625	11.1111	20.6349	1.5873	-0.120313	-1.46667	4.28
cand_367	chr10	-	132760899	132760921	acucuucugacuccaaguccagu	296	CUCCACUCUUCUGACUCCAAGUCCAGUGAUGGCCUCCGAGUGGAGGGUGGAGGAUUCC	(((((((((((..((((..((.(((....))).))..)))))))))))))))......	58.62	-0.00811839	-0.158621	-0.4759	-1.05771e+06	0.585786	0.0316	-0.481897	0.00603448	-476.9	-8.22241	6.66667	0.12069	0.189655	0.0344828	11.6667	18.3333	3.33333	-0.118966	-1.38	1.59
cand_297	chr7	-	141274824	141274839	ugggguuagguuuagc	189	UUCUUGAAUUAAUGAAUUCAAGUGGGGUUAGGUUUAGCUGGGCUUUUUCCUAAACCCACUUGCAGGGAAGA	((((((............((((((((.(((((...(((...)))....))))).))))))))))))))...	40.85	-0.00796573	-0.108451	-0.3254	-1040.06	0.585786	0.0554	-0.345915	0.0205634	-581	-8.1831	7.33333	0.126761	0.15493	0.028169	13.6364	16.6667	3.0303	-0.081338	-1.05	4.315
cand_26	chrx	-	133304113	133304136	acuaacugcacuagaugcaccuua	173	AAGGGGCAUUUAGGGCAGUAGAUUCUAAGCUGCUUCACUAACUGCACUAGAUGCACCUUAACACAAGAGACACAUUAUAAGAAGCA	((((.((((((((.(((((.((..(......)..))....))))).)))))))).))))...........................	41.86	-0.00600096	-0.125581	-0.2512	-5530.49	1	0.0329	-0.267093	0.0159302	-364	-4.23256	10	0.104651	0.116279	0.0116279	22.5	25	2.5	-0.0837209	-1.08	4.5
cand_200	chr5	-	60240917	60240938	ggauauaucaccgacugaccaa	166	AACGGCGCUCACCAUUGGCCGGAUAUAUCACCGACUGACCAAUGGGAGACUCUGCUGUUC	((((((((((.(((((((((((........)))...).))))))))))....))))))).	55	-0.00645455	-0.118333	-0.355	0.1629	0.585786	0.0319	-0.377167	0.0221667	-491.1	-8.185	7	0.1	0.216667	0.0333333	9.52381	20.6349	3.1746	-0.08875	-1.01429	2.63
cand_458	chr13	-	50570599	50570622	acgaacaaaaaaaaaaguacaaca	146	GGGUUGGGCUUUUUUUUUUGUUCCUAAAAAUGCAACGAACAAAAAAAAAAGUACAACAAUCCAAACCCAACCAUC	((((((.((((((((((((((((.............))))))))))))))))....)))))).............	34.67	-0.00904528	-0.156667	-0.3136	-0.1525	1	0.0361	-0.3248	0.0112	-526.2	-7.016	11	0.186667	0.08	0.0266667	31.8182	13.6364	4.54545	-0.104444	-1.06909	4.95
cand_1040	chr11	+	55726928	55726948	ucaaguaauccaggauauuuu	106	GUAUUUUAUAUAAUAAUGUGUAAGUUACAUCAUAGUCAAGUAAUCCAGGAUAUUUUAUAAAUAUGAAAUACUUUA	(((((((((((.((((.((((..(((((...........))))).....)))).))))..)))))))))))....	20	-0.007735	-0.0515556	-0.1547	-35.3348	0.585786	0.0317	-0.176133	0.0214667	-497.2	-6.62933	8	0.24	0.0266667	0.0533333	25	2.77778	5.55556	-0.0386667	-0.483333	9.14
cand_887	chr6	+	92231427	92231449	gacacaugaccauaaaugcuaaa	103	AGCAUUUAUAAUCAUGUGUUCAUUCACAUGAUCAUAAGUGGACACAUGACCAUAAAUGCUAAAGCACACUUACUUCUACAACAUAC	(((((((((..(((((((((((((............)))))))))))))..)))))))))..........................	33.72	-0.00868921	-0.146512	-0.293	0.0641	1	0.0316	-0.304419	0.0113953	-511.4	-5.94651	11	0.162791	0.0697674	0.0232558	31.8182	13.6364	4.54545	-0.0976744	-1.14545	1.715
cand_686	chr1	+	85599524	85599546	cauaggcaccaaaaagcaacaac	102	ACUGCAGUUGCCUUUUUGUUCCCAUGCUGUUUAAGCCUAGCAUAGGCACCAAAAAGCAACAACAGUAUGUGAAA	((((..(((((.((((((..((.((((((........)))))).))...)))))))))))..))))........	41.89	-0.00722607	-0.100901	-0.3027	-3575.43	0.585786	0.0318	-0.323919	0.0212162	-478.8	-6.47027	7.66667	0.162162	0.135135	0.0135135	17.3913	14.4928	1.44928	-0.0756757	-0.973913	3.5
cand_670	chr1	+	32226516	32226532	ccgacugccagagaggg	96	GAGGGAGCGACCCCCUCUGUGCAGUCCUCCCGCUCCGACUGCCAGAGAGGGUCGCUCUCUUAGGGGAGGGGG	(((((((((((((.(((((.((((((..........))))))))))).)))))))))))))...........	69.44	-0.00864055	-0.6	-0.6	-3.34804e+13	2	0.0436	-0.601667	0.00166667	-642.9	-8.92917	24	0.0972222	0.208333	0.0277778	29.1667	62.5	8.33333	-0.3	-1.8	0.23
cand_54	chr1	-	96719741	96719763	uaaccaagucagggucucaggga	88	GGAUUCCCACAGUUCUCUCUGGCUGUUGUAACCAAGUCAGGGUCUCAGGGACUCAGGGACUCCAAAAUCUGUCU	(((.((((..((((((((((((((..........)))))))).....))))))..)))).)))...........	51.35	-0.00673612	-0.115315	-0.3459	-6.9288	0.585786	0.0316	-0.352568	0.00662162	-500.4	-6.76216	7	0.0810811	0.148649	0.0540541	9.52381	17.4603	6.34921	-0.0864865	-1.21905	1.36
cand_139	chr3	-	53272776	53272796	gccuaggccagcaucuugccu	82	CAAGAGCAGCCUGGGUACCUCCACCACCAACUGGAUGGCCUAGGCCAGCAUCUUGCCUCAGCUU	(((((((.((((((((...((((........))))..))))))))..)).))))).........	59.38	-0.00657797	-0.130208	-0.3906	-23.5572	0.585786	0.0319	-0.397813	0.0071875	-546.8	-8.54375	6.33333	0.09375	0.171875	0.03125	10.5263	19.2982	3.50877	-0.0976562	-1.31579	1.88
cand_711	chr2	+	7932511	7932525	ggggguauagcccag	72	CUGUUUGACUUGGCUGCAGUCCCCACAAACCUGGUGGGGGGUAUAGCCCAGAGGAAAACAGCCU	((((((..((((((((.(.(((((((.......))))))).).)))))..)))..))))))...	56.25	-0.00813867	-0.152604	-0.4578	-1.05415e+07	0.585786	0.0391	-0.465781	0.00796875	-522.7	-8.16719	7.33333	0.125	0.171875	0.046875	12.1212	16.6667	4.54545	-0.114453	-1.33182	0.985
cand_880	chr6	+	34568657	34568679	uguguucucuuaacauugcacug	71	UGUGUUCUCUUAACAUUGCACUGCAUUGCUUCCCAAUUGCAGUGUUCAAGUACACAU	(((((...((((((((((((....((((.....))))))))))))).))).))))).	40.35	-0.00721685	-0.097076	-0.2912	-78.4505	0.585786	0.041	-0.315263	0.0240351	-508.1	-8.91404	7	0.22807	0.122807	0.0175439	20.6349	11.1111	1.5873	-0.072807	-0.790476	5.6
cand_69	chr1	-	180049981	180049998	uauucaguguauugcuuu	69	AUAUUGAAUAUUGCCAUAUUGAAUAUAUCGAGUUAGGCAUAUUCAGUGUAUUGCUUUUUUUGUUAUUUUUUAA	(((((((((((.(((...((((.....))))....))))))))))))))........................	23.29	-0.00941176	-0.109589	-0.2192	-0.2866	1	0.0316	-0.232055	0.0128767	-419.8	-5.75068	9	0.136986	0.0684932	0.0410959	27.7778	13.8889	8.33333	-0.0730594	-0.888889	1.88
cand_1250	chr21	+	9703641	9703655	ccaaggcguacccca	63	GGCUUUCUGCCCACCUUGGGGUACCCCUACUGUCCCAAGGCGUACCCCAGGGUCAAACCAGGGACGCCA	((((..(((...((((((((((((.(((.........))).)))))))))))).....)))..).))).	63.77	-0.00802258	-0.170531	-0.5116	-1.1066e+10	0.585786	0.043	-0.52029	0.00869565	-609.4	-8.83188	7.33333	0.101449	0.202899	0.0144928	10.6061	21.2121	1.51515	-0.127899	-1.60455	1.215
cand_428	chr12	-	53908043	53908064	acucaggcuucccaccccacuc	61	GUAUGGUGGGUGUCCUGAAUUCGUUCAUGUGAAUACAGGACUCAGGCUUCCCACCCCACUCCAAUGU	((..((((((.((((((.(((((......))))).))))))........))))))..))........	50.75	-0.0068532	-0.11592	-0.3478	-3.55176e+10	0.585786	0.0327	-0.364627	0.0168657	-532.3	-7.94478	6.33333	0.104478	0.164179	0.0149254	12.2807	19.2982	1.75439	-0.0869403	-1.22632	9.225
cand_67	chr1	-	170374239	170374260	uugagaugagucugauaagcua	58	UUCCAUUUGUUAGUCUUACUUGAUUUAUUGAGAUGAGUCUGAUAAGCUAAUGAAAUGGAAGCAAA	(((((((((((((.((((...(((((((....)))))))...))))))))).)))))))).....	30.77	-0.00970101	-0.149231	-0.2985	0.1003	1	0.0549	-0.316615	0.0181538	-535.2	-8.23385	12	0.246154	0.0769231	0.0461538	33.3333	10.4167	6.25	-0.0994872	-0.808333	2.515
cand_165	chr4	-	21466360	21466382	uugagcaacgcuauacaccagau	56	UCUAUUUGGUGUAUACUGUUGUUCAAAGAAAUAGAGGACUUGAGCAACGCUAUACACCAGAUAGACCUGACA	(((((((((((((((.((((((((((.............)))))))))).))))))))))))))).......	38.89	-0.0112574	-0.4375	-0.4378	-1.3352	2	0.0317	-0.447222	0.00944444	-538.4	-7.47778	25	0.208333	0.0972222	0.0416667	60	28	12	-0.21875	-1.2608	1.3
cand_799	chr3	+	183495494	183495515	uuggggugugugcaugggcgua	55	ACAUGUAAAUAUGUAAAUAAAUGCCAUAAUCACCCCAUAUUUGGGGUGUGUGCAUGGGCGUAUUUACCUGUGUAAA	(((.((((((((((......((((((....(((((((....))))))))).))))..)))))))))).))).....	36.84	-0.010285	-0.126316	-0.3789	-4.33258e+10	0.585786	0.0317	-0.396711	0.0177632	-609.1	-8.01447	8.66667	0.171053	0.144737	0.0263158	16.6667	14.1026	2.5641	-0.0947368	-1.10769	3.39
cand_586	chr19	-	49812064	49812084	acccugagacccuaaccuuaa	51	GGCCCCUUUGUUAAGGGUCUCAGCUCCAGGGAACUUUAAAACCCUGAGACCCUAACCUUAAAGGUGCUGCAAAGAC	(((.((((((...((((((((((.....((...........)))))))))))).....)))))).)))........	50	-0.006974	-0.116228	-0.3487	-547249	0.585786	0.0574	-0.370132	0.0214474	-551	-7.25	7	0.0921053	0.157895	0.0263158	11.1111	19.0476	3.1746	-0.0871711	-1.2619	4.565
cand_794	chr3	+	176232889	176232909	uuggugcguuggcugggaaac	50	ACCUUGGGUGUUUCUCCAGACAACAGACCCAUAUCAUUUUUGGUGCGUUGGCUGGGAAACCAAGGUA	(((((((...((((.((((.((((.(..(((.........)))..))))).))))))))))))))).	47.76	-0.00787479	-0.125373	-0.3761	-3292.38	0.585786	0.0377	-0.397761	0.0216418	-544.6	-8.12836	7.66667	0.149254	0.19403	0	14.4928	18.8406	0	-0.0940299	-1.09565	3.36
These are novel miRNAs not previously reported in any species. The novel miRNA candidate with expression levels exceeding 50 read counts/million in all sequenced samples are presented (XLS file)
